# Supplementary material
Source: PubMed Central journal article supplement (PMC10391355)
Supplement: jamaneurol-e232392-s001.pdf [file jamaneurol-e232392-s001.pdf]

## Supplementary Online Content

Chalos V, Venema E, Mulder MJHL, et al; HERMES Collaborators; MR CLEAN Registry Investigators. Development and validation of a postprocedural model to predict outcome after endovascular treatment for ischemic stroke. *JAMA Neurol*. Published online July 31, 2023. doi:10.1001/jamaneurol.2023.2392

**eTable.** Main Effects of Final Model in Derivation Cohort and Validation Cohort Presented as Common Odds Ratios With 95% CIs

**eAppendix.** R Code (Full Regression Equation)

**eFigure 1.** Flow of Patients in Derivation Cohort (HERMES)

**eFigure 2.** Flow of Patients in Validation Cohort (MR CLEAN Registry)

This supplementary material has been provided by the authors to give readers additional information about their work.

**eTable.** Main effects of final model in derivation cohort and validation cohort presented as common odds ratios<sup>a</sup> with 95% CIs

|                                                      | <b>Derivation cohort<br/>HERMES (n=781)</b> | <b>Validation cohort<br/>MR CLEAN Registry (n=3260)</b> |
|------------------------------------------------------|---------------------------------------------|---------------------------------------------------------|
| Age, per year                                        |                                             |                                                         |
| <65 years                                            | 0.99 (0.98 – 1.01)                          | 1.01 (1.00 – 1.02)                                      |
| ≥65 years                                            | 0.94 (0.91 – 0.96)                          | 0.93 (0.92 – 0.94)                                      |
| Baseline NIHSS, per point                            | 1.03 (1.00 – 1.06)                          | 1.00 (0.98 – 1.01)                                      |
| Diabetes mellitus                                    | 0.48 (0.33 – 0.71)                          | 0.57 (0.47 – 0.69)                                      |
| Pre-stroke mRS, per point                            | 0.62 (0.46 – 0.84)                          | 0.60 (0.55 – 0.65)                                      |
| Occlusion location                                   |                                             |                                                         |
| ICA(-T)                                              | 1.0 (reference)                             | 1.0 (reference)                                         |
| M1                                                   | 1.29 (0.94 – 1.75)                          | 1.16 (0.98 – 1.38)                                      |
| M2 or other                                          | 2.03 (1.19 – 3.48)                          | 1.32 (1.06 – 1.65)                                      |
| Collateral score, per point                          | 1.25 (0.94 – 1.64)                          | 1.12 (1.03 – 1.22)                                      |
| Post-procedural reperfusion grade (mTICI), per point | 1.19 (1.02 – 1.40)                          | 1.11 (1.05 – 1.17)                                      |
| 24h NIHSS, per point                                 |                                             |                                                         |
| <12 points                                           | 0.71 (0.68 – 0.75)                          | 0.78 (0.76 – 0.80)                                      |
| ≥12 points                                           | 0.86 (0.83 – 0.90)                          | 0.84 (0.82 – 0.86)                                      |
| SICH*                                                | 0.28 (0.10 – 0.76)                          | 0.19 (0.12 – 0.28)                                      |

Abbreviations: NIHSS, National Institutes of Health Stroke Scale; mRS, modified Rankin Scale; ICA(-T), intracranial carotid artery (-terminus); M1, middle cerebral artery segment 1; M2, middle cerebral artery segment 2; mTICI, modified treatment in cerebral infarction; SICH, symptomatic intracranial hemorrhage.

<sup>a</sup>Common odds ratios reflect the effect on the reversed modified Rankin Scale (an odds ratio >1 corresponds with better functional outcome).

**eAppendix. R Code (full regression equation)<sup>a</sup>**

```
plogis((+0.00907192*age - 4.83914e-05*pmax(age-50.5,0)^3 + 0.000118985*pmax(age-72,0)^3 -
7.05932e-05*pmax(age-86.5,0)^3 - 0.00333532*NIHSS baseline - 0.563654*diabetes mellitus -
0.508099*pre-mRS + 0.154629*(occlusion location=="M1") + 0.282501*(occlusion location=="M2") +
0.115803*collateral scoreb + 0.0793556*eTICI - 0.252124*NIHSS24h +
0.000148483*pmax(NIHSS24h-1,0)^3 - 0.000272219*pmax(NIHSS24h-11,0)^3 +
0.000123736*pmax(NIHSS24h-23,0)^3 - 1.68195*sICH) + interceptc)
```

<sup>a</sup> Variable definitions

| Variable                      | Definition                               |
|-------------------------------|------------------------------------------|
| Age                           | Numeric; in years                        |
| NIHSS baseline                | Numeric; range 1-42                      |
| Diabetes mellitus             | Binary; 0=no, 1=yes                      |
| Pre-mRS                       | Numeric; 0=0, 1=1, 2=2, >2=3             |
| Occlusion location            | Categorical; ICA-(T), M1, M2             |
| Collateral score <sup>b</sup> | Numeric; range 0-3                       |
| eTICI                         | Numeric; 0=0, 1=1, 2A=2, 2B=3, 2C=4, 3=5 |
| NIHSS 24h                     | Numeric; range 0-42                      |
| sICH                          | Binary; 0=no, 1=yes                      |

<sup>b</sup> When collateral score is missing, use coefficient 0.198023 instead of 0.115803\*collateral score. This coefficient is based on the weighted average of all collateral scores in the MR CLEAN Registry.

<sup>c</sup> Intercepts per modified Rankin Scale cut-point for HERMES and MR CLEAN Registry

To reflect the average baseline risk of both settings and populations, the model intercept was calculated for HERMES (representing selected RCT populations) and the MR CLEAN Registry (representing a broad population as treated in more recent clinical practice) separately.

For the online tool at [www.mrpredicts.com](http://www.mrpredicts.com), the intercept of the MR CLEAN Registry was used.

| mRS cut-point  | Intercept<br>HERMES | Intercept<br>MR CLEAN Registry |
|----------------|---------------------|--------------------------------|
| mRS 0 vs 1-6   | -1.49640            | -1.60096                       |
| mRS 0-1 vs 2-6 | 0.0655256           | 0.186484                       |
| mRS 0-2 vs 3-6 | 1.46388             | 1.69889                        |
| mRS 0-3 vs 4-6 | 2.79135             | 2.81098                        |
| mRS 0-4 vs 5-6 | 4.19445             | 3.80616                        |
| mRS 0-5 vs 6   | 4.86642             | 4.28056                        |

**eFigure 1.** Flow of patients in derivation cohort (HERMES)

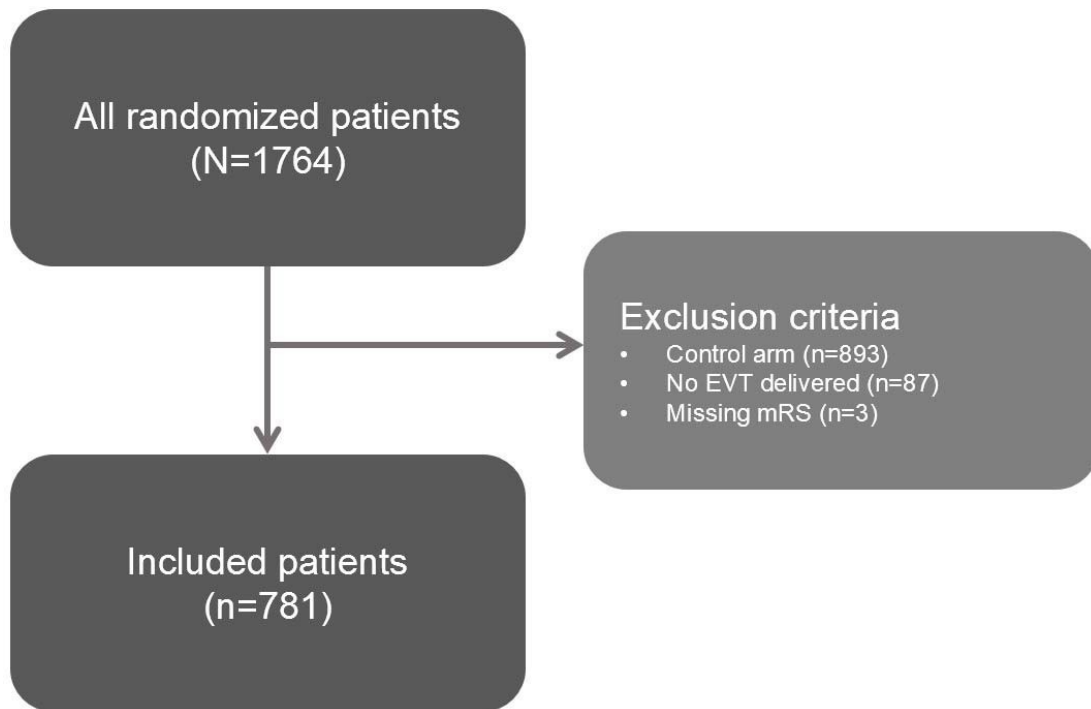

Abbreviations: EVT, endovascular treatment; mRS, modified Rankin Scale

**eFigure 2.** Flow of patients in validation cohort (MR CLEAN Registry)

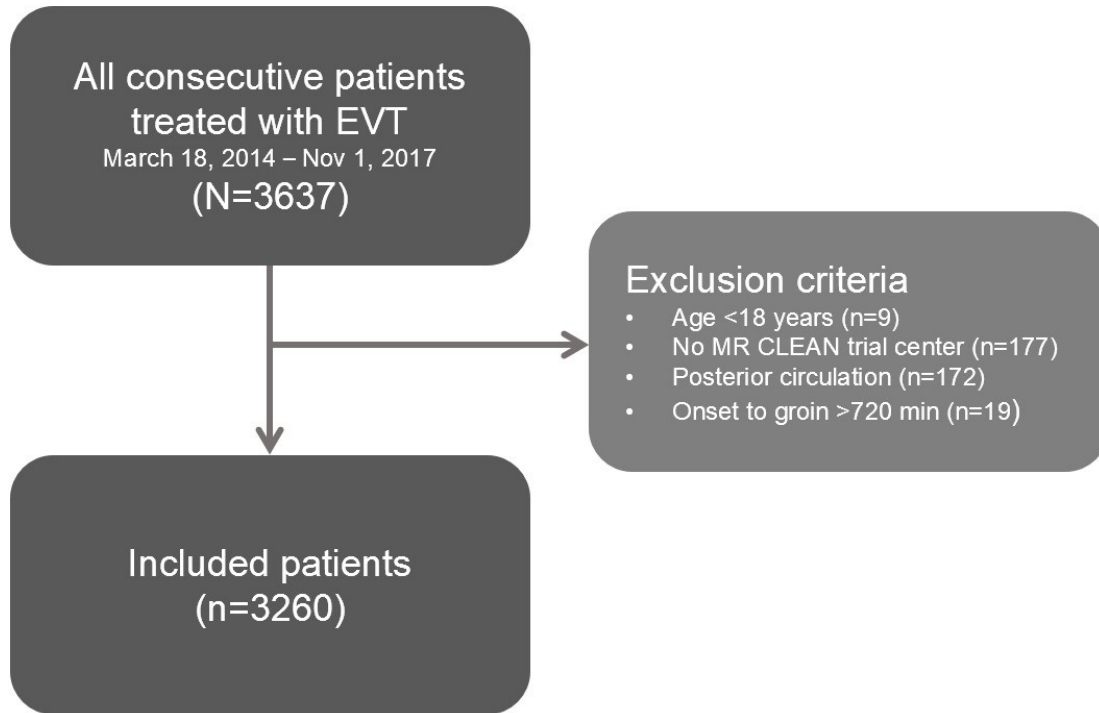

Abbreviations: EVT, endovascular treatment
