# Supplementary material
Source: PubMed Central journal article supplement (PMC10391355)
Supplement: jamaneurol-e232392-s002.pdf [file jamaneurol-e232392-s002.pdf]

\*First name, last name, and suffix (if applicable) are required and will appear in PubMed.

| <b>*Group Name(s): HERMES Collaborators and MR CLEAN Registry Investigators</b> |                   |                              |                  |                                                          |                                          |                                                                                       |                                                                                            |
|---------------------------------------------------------------------------------|-------------------|------------------------------|------------------|----------------------------------------------------------|------------------------------------------|---------------------------------------------------------------------------------------|--------------------------------------------------------------------------------------------|
| <b>*First Name and Middle Initial(s)</b>                                        | <b>*Last Name</b> | <b>*Suffix (eg, Jr, III)</b> | Academic Degrees | Institution                                              | Location (city, state/province, country) | Role or Contribution, eg, chair, principal investigator                               | Group (if more than 1 Group listed in the byline) and/or Subgroup (eg, Steering Committee) |
| Olvert A.                                                                       | Berkhemer         |                              |                  | Academic Medical Center<br>Amsterdam                     | Amsterdam, the Netherlands               | Coordinating Investigator MR CLEAN, Executive committee, Imaging assessment committee | HERMES collaborators                                                                       |
| Puck S.S.                                                                       | Fransen           |                              |                  | Erasmus MC University Medical Center                     | Rotterdam, the Netherlands               | Coordinating Investigator MR CLEAN, Executive committee                               | HERMES collaborators                                                                       |
| Debbie                                                                          | Beumer            |                              |                  | Maastricht University Medical Center                     | Maastricht, the Netherlands              | Coordinating Investigator MR CLEAN, Executive committee                               | HERMES collaborators                                                                       |
| Lucie A.                                                                        | van den Berg      |                              |                  | Academic Medical Center<br>Amsterdam                     | Amsterdam, the Netherlands               | Executive committee MR CLEAN                                                          | HERMES collaborators                                                                       |
| Hester F.                                                                       | Lingsma           |                              |                  | Erasmus MC University Medical Center                     | Rotterdam, the Netherlands               | Trial Statistician MR CLEAN                                                           | HERMES collaborators                                                                       |
| Albert J.                                                                       | Yoo               |                              |                  | Massachusetts General Hospital,<br>Boston, US of America | Boston, US of America                    | Imaging assessment committee MR CLEAN                                                 | HERMES collaborators                                                                       |
| Wouter J.                                                                       | Schonewille       |                              |                  | Sint Antonius Hospital                                   | Nieuwegein, the Netherlands              | Local PI MR CLEAN                                                                     | HERMES collaborators                                                                       |
| Jan Albert                                                                      | Vos               |                              |                  | Sint Antonius Hospital                                   | Nieuwegein, the Netherlands              | Local PI MR CLEAN                                                                     | HERMES collaborators                                                                       |
| Paul J.                                                                         | Nederkoorn        |                              |                  | Academic Medical Center<br>Amsterdam                     | Amsterdam, the Netherlands               | Local PI MR CLEAN                                                                     | HERMES collaborators                                                                       |
| Marieke J.H.                                                                    | Wermer            |                              |                  | Leiden University Medical Center                         | Leiden, the Netherlands                  | Local PI MR CLEAN                                                                     | HERMES collaborators                                                                       |
| Marianne A.A.                                                                   | van Walderveen    |                              |                  | Leiden University Medical Center                         | Leiden, the Netherlands                  | Local PI MR CLEAN                                                                     | HERMES collaborators                                                                       |

## Supplemental Online Content: Nonauthor Collaborators

\*First name, last name, and suffix (if applicable) are required and will appear in PubMed.

| *First Name and Middle Initial(s) | *Last Name          | *Suffix (eg, Jr, III) | Academic Degrees | Institution                          | Location (city, state/province, country) | Role or Contribution, eg, chair, principal investigator | Group (if more than 1 Group listed in the byline) and/or Subgroup (eg, Steering Committee) |
|-----------------------------------|---------------------|-----------------------|------------------|--------------------------------------|------------------------------------------|---------------------------------------------------------|--------------------------------------------------------------------------------------------|
| Julie                             | Staals              |                       |                  | Maastricht University Medical Center | Maastricht, the Netherlands              | Local PI MR CLEAN                                       | HERMES collaborators                                                                       |
| Jeannette                         | Hofmeijer           |                       |                  | Rijnstate Hospital                   | Arnhem, the Netherlands                  | Local PI MR CLEAN                                       | HERMES collaborators                                                                       |
| Jacques A.                        | van Oostayen        |                       |                  | Rijnstate Hospital                   | Arnhem, the Netherlands                  | Local PI MR CLEAN                                       | HERMES collaborators                                                                       |
| Geert J.                          | Lycklama à Nijeholt |                       |                  | MC Haaglanden                        | the Hague, the Netherlands               | Local PI MR CLEAN                                       | HERMES collaborators                                                                       |
| Jelis                             | Boiten              |                       |                  | MC Haaglanden                        | the Hague, the Netherlands               | Outcome assessment committee MR CLEAN, Local PI         | HERMES collaborators                                                                       |
| Patrick A.                        | Brouwer             |                       |                  | Erasmus MC University Medical Center | Rotterdam, the Netherlands               | Local PI MR CLEAN                                       | HERMES collaborators                                                                       |
| Bart J.                           | Emmer               |                       |                  | Erasmus MC University Medical Center | Rotterdam, the Netherlands               | Local PI MR CLEAN                                       | HERMES collaborators                                                                       |
| Sebastiaan F.                     | de Bruijn           |                       |                  | HAGA Hospital                        | the Hague, the Netherlands               | Local PI MR CLEAN                                       | HERMES collaborators                                                                       |
| Lukas C.                          | van Dijk            |                       |                  | HAGA Hospital                        | the Hague, the Netherlands               | Local PI MR CLEAN                                       | HERMES collaborators                                                                       |
| L. Jaap                           | Kappelle            |                       |                  | University Medical Center Utrecht    | Utrecht, the Netherlands                 | Local PI MR CLEAN                                       | HERMES collaborators                                                                       |
| Rob H.                            | Lo                  |                       |                  | University Medical Center Utrecht    | Utrecht, the Netherlands                 | Local PI MR CLEAN                                       | HERMES collaborators                                                                       |
| Ewoud J.                          | van Dijk            |                       |                  | Radboud University Medical Center    | Nijmegen, the Netherlands                | Outcome assessment committee MR CLEAN, Local PI         | HERMES collaborators                                                                       |
| Joost                             | de Vries            |                       |                  | Radboud University Medical Center    | Nijmegen, the Netherlands                | Local PI MR CLEAN                                       | HERMES collaborators                                                                       |
| Paul L.M.                         | de Kort             |                       |                  | Sint Elisabeth Hospital              | Tilburg, the Netherlands                 | Local PI MR CLEAN                                       | HERMES collaborators                                                                       |
| Willem Jan. J.                    | van Rooij           |                       |                  | Sint Elisabeth Hospital              | Tilburg, the Netherlands                 | Local PI MR CLEAN                                       | HERMES collaborators                                                                       |

## Supplemental Online Content: Nonauthor Collaborators

\*First name, last name, and suffix (if applicable) are required and will appear in PubMed.

| *First Name and Middle Initial(s) | *Last Name   | *Suffix (eg, Jr, III) | Academic Degrees | Institution                         | Location (city, state/province, country) | Role or Contribution, eg, chair, principal investigator | Group (if more than 1 Group listed in the byline) and/or Subgroup (eg, Steering Committee) |
|-----------------------------------|--------------|-----------------------|------------------|-------------------------------------|------------------------------------------|---------------------------------------------------------|--------------------------------------------------------------------------------------------|
| Jan S.P.                          | van den Berg |                       |                  | Isala Klinieken                     | Zwolle, the Netherlands                  | Local PI MR CLEAN                                       | HERMES collaborators                                                                       |
| Boudewijn A.A.M.                  | van Hasselt  |                       |                  | Isala Klinieken                     | Zwolle, the Netherlands                  | Local PI MR CLEAN                                       | HERMES collaborators                                                                       |
| Leo A.M.                          | Aerden       |                       |                  | Reinier de Graaf Gasthuis           | Delft, the Netherlands                   | Local PI MR CLEAN                                       | HERMES collaborators                                                                       |
| René J.                           | Dallinga     |                       |                  | Reinier de Graaf Gasthuis           | Delft, the Netherlands                   | Local PI MR CLEAN                                       | HERMES collaborators                                                                       |
| Marieke C.                        | Visser       |                       |                  | VU Medical Center                   | Amsterdam, the Netherlands               | Local PI MR CLEAN                                       | HERMES collaborators                                                                       |
| Joseph C.J.                       | Bot          |                       |                  | VU Medical Center                   | Amsterdam, the Netherlands               | Local PI MR CLEAN                                       | HERMES collaborators                                                                       |
| Patrick C.                        | Vroomen      |                       |                  | University Medical Center Groningen | Groningen, the Netherlands               | Local PI MR CLEAN                                       | HERMES collaborators                                                                       |
| Omid                              | Eshghi       |                       |                  | University Medical Center Groningen | Groningen, the Netherlands               | Local PI MR CLEAN                                       | HERMES collaborators                                                                       |
| Tobien H.C.M.L.                   | Schreuder    |                       |                  | Atrium Medical Center               | Heerlen, the Netherlands                 | Local PI MR CLEAN                                       | HERMES collaborators                                                                       |
| Roel J.J.                         | Heijboer     |                       |                  | Atrium Medical Center               | Heerlen, the Netherlands                 | Local PI MR CLEAN                                       | HERMES collaborators                                                                       |
| Koos                              | Keizer       |                       |                  | Catharina Hospital                  | Eindhoven, the Netherlands               | Local PI MR CLEAN                                       | HERMES collaborators                                                                       |
| Alexander V.                      | Tielbeek     |                       |                  | Catharina Hospital                  | Eindhoven, the Netherlands               | Local PI MR CLEAN                                       | HERMES collaborators                                                                       |
| Heleen M.                         | den Hertog   |                       |                  | Medical Spectrum Twente             | Enschede, the Netherlands                | Local PI MR CLEAN                                       | HERMES collaborators                                                                       |
| Dick G.                           | Gerrits      |                       |                  | Medical Spectrum Twente             | Enschede, the Netherlands                | Local PI MR CLEAN                                       | HERMES collaborators                                                                       |

## Supplemental Online Content: Nonauthor Collaborators

\*First name, last name, and suffix (if applicable) are required and will appear in PubMed.

| *First Name and Middle Initial(s) | *Last Name       | *Suffix (eg, Jr, III) | Academic Degrees | Institution                          | Location (city, state/province, country) | Role or Contribution, eg, chair, principal investigator | Group (if more than 1 Group listed in the byline) and/or Subgroup (eg, Steering Committee) |
|-----------------------------------|------------------|-----------------------|------------------|--------------------------------------|------------------------------------------|---------------------------------------------------------|--------------------------------------------------------------------------------------------|
| Renske M.                         | van den Berg-Vos |                       |                  | Sint Lucas Andreas Hospital          | Amsterdam, the Netherlands               | Local PI MR CLEAN                                       | HERMES collaborators                                                                       |
| Giorgos B.                        | Karas            |                       |                  | Sint Lucas Andreas Hospital          | Amsterdam, the Netherlands               | Local PI MR CLEAN                                       | HERMES collaborators                                                                       |
| Ewout W.                          | Steyerberg       |                       |                  | Erasmus MC University Medical Center | Rotterdam, the Netherlands               | Trial statistician MR CLEAN                             | HERMES collaborators                                                                       |
| H. Zwenneke                       | Flach            |                       |                  | Isala Klinieken                      | Zwolle, the Netherlands                  | Adverse event committee MR CLEAN                        | HERMES collaborators                                                                       |
| Henk A.                           | Marquering       |                       |                  | Academic Medical Center Amsterdam    | Amsterdam, the Netherlands               | Imaging assessment committee MR CLEAN                   | HERMES collaborators                                                                       |
| Marieke E.S.                      | Sprengers        |                       |                  | Academic Medical Center Amsterdam    | Amsterdam, the Netherlands               | Imaging assessment committee MR CLEAN                   | HERMES collaborators                                                                       |
| Sjoerd F.M.                       | Jenniskens       |                       |                  | Radboud University Medical Center    | Nijmegen, the Netherlands                | Imaging assessment committee MR CLEAN                   | HERMES collaborators                                                                       |
| Ludo F.M.                         | Beenen           |                       |                  | Academic Medical Center Amsterdam    | Amsterdam, the Netherlands               | Imaging assessment committee MR CLEAN                   | HERMES collaborators                                                                       |
| René                              | van den Berg     |                       |                  | Academic Medical Center Amsterdam    | Amsterdam, the Netherlands               | Imaging assessment committee MR CLEAN                   | HERMES collaborators                                                                       |
| Peter J.                          | Koudstaal        |                       |                  | Erasmus MC University Medical Center | Rotterdam, the Netherlands               | Advisory Board MR CLEAN, Outcome assessment committee   | HERMES collaborators                                                                       |
| Wim H.                            | van Zwam         |                       |                  | Maastricht University Medical Center | Maastricht, the Netherlands              | Executive committee MR CLEAN, Local PI                  | HERMES collaborators                                                                       |

## Supplemental Online Content: Nonauthor Collaborators

\*First name, last name, and suffix (if applicable) are required and will appear in PubMed.

| *First Name and Middle Initial(s) | *Last Name       | *Suffix (eg, Jr, III) | Academic Degrees | Institution                                    | Location (city, state/province, country) | Role or Contribution, eg, chair, principal investigator                                      | Group (if more than 1 Group listed in the byline) and/or Subgroup (eg, Steering Committee) |
|-----------------------------------|------------------|-----------------------|------------------|------------------------------------------------|------------------------------------------|----------------------------------------------------------------------------------------------|--------------------------------------------------------------------------------------------|
| Yvo B.W.E.M.                      | Roos             |                       |                  | Academic Medical Center<br>Amsterdam           | Amsterdam, the Netherlands               | Principal Investigator MR CLEAN, Executive committee, Outcome assessment committee, Local PI | HERMES collaborators                                                                       |
| Aad                               | van der Lugt     |                       |                  | Erasmus MC University Medical Center           | Rotterdam, the Netherlands               | Principal Investigator MR CLEAN, Executive committee                                         | HERMES collaborators                                                                       |
| Robert J.                         | van Oostenbrugge |                       |                  | Maastricht University Medical Center           | Maastricht, the Netherlands              | Principal Investigator MR CLEAN, Executive committee, Adverse event committee, Local PI      | HERMES collaborators                                                                       |
| Charles B.L.M.                    | Majoie           |                       |                  | Academic Medical Center<br>Amsterdam           | Amsterdam, the Netherlands               | Principal Investigator MR CLEAN, Executive committee, Local PI                               | HERMES collaborators                                                                       |
| Diederik W.J.                     | Dippel           |                       |                  | Erasmus MC University Medical Center           | Rotterdam, the Netherlands               | Principal Investigator MR CLEAN, Executive committee, Local PI                               | HERMES collaborators                                                                       |
| Martin M.                         | Brown            |                       |                  | National Hospital for Neurology & Neurosurgery | London, UK                               | DSMB (Chair) MR CLEAN                                                                        | HERMES collaborators                                                                       |
| Thomas                            | Liebig           |                       |                  | Med. Fakultät, Univ Köln                       | Köln, Germany                            | DSMB (Member) MR CLEAN                                                                       | HERMES collaborators                                                                       |
| Theo                              | Stijnen          |                       |                  | Leiden University Medical Center               | Leiden, the Netherlands                  | DSMB (Independent Statistician) MR CLEAN                                                     | HERMES collaborators                                                                       |
| Tommy                             | Andersson        |                       |                  | Karolinska University Hospital                 | Stockholm, Sweden                        | Advisory Board MR CLEAN                                                                      | HERMES collaborators                                                                       |
| Heinrich                          | Mattle           |                       |                  | University hospital                            | Bern, Switzerland                        | Advisory Board MR CLEAN                                                                      | HERMES collaborators                                                                       |
| Nils                              | Wahlgren         |                       |                  | Karolinska University Hospital                 | Stockholm, Sweden                        | Advisory Board MR CLEAN                                                                      | HERMES collaborators                                                                       |
| Esther                            | van der Heijden  |                       |                  | Erasmus MC University Medical Center           | Rotterdam, the Netherlands               | Research nurse / local trial coordinator MR CLEAN                                            | HERMES collaborators                                                                       |

## Supplemental Online Content: Nonauthor Collaborators

\*First name, last name, and suffix (if applicable) are required and will appear in PubMed.

| *First Name and Middle Initial(s) | *Last Name    | *Suffix (eg, Jr, III) | Academic Degrees | Institution                          | Location (city, state/province, country) | Role or Contribution, eg, chair, principal investigator | Group (if more than 1 Group listed in the byline) and/or Subgroup (eg, Steering Committee) |
|-----------------------------------|---------------|-----------------------|------------------|--------------------------------------|------------------------------------------|---------------------------------------------------------|--------------------------------------------------------------------------------------------|
| Naziha                            | Ghannouti     |                       |                  | Erasmus MC University Medical Center | Rotterdam, the Netherlands               | Research nurse / local trial coordinator MR CLEAN       | HERMES collaborators                                                                       |
| Nadine                            | Fleitour      |                       |                  | Academic Medical Center Amsterdam    | Amsterdam, the Netherlands               | Research nurse / local trial coordinator MR CLEAN       | HERMES collaborators                                                                       |
| Imke                              | Hooijenga     |                       |                  | Academic Medical Center Amsterdam    | Amsterdam, the Netherlands               | Research nurse / local trial coordinator MR CLEAN       | HERMES collaborators                                                                       |
| Corina                            | Puppels       |                       |                  | Sint Antonius Hospital               | Nieuwegein, the Netherlands              | Research nurse / local trial coordinator MR CLEAN       | HERMES collaborators                                                                       |
| Wilma                             | Pellikaan     |                       |                  | Sint Antonius Hospital               | Nieuwegein, the Netherlands              | Research nurse / local trial coordinator MR CLEAN       | HERMES collaborators                                                                       |
| Annet                             | Geerling      |                       |                  | Radboud University Medical Center    | Nijmegen, the Netherlands                | Research nurse / local trial coordinator MR CLEAN       | HERMES collaborators                                                                       |
| Annemieke                         | Lindl-Velema  |                       |                  | Maastricht University Medical Center | Maastricht, the Netherlands              | Research nurse / local trial coordinator MR CLEAN       | HERMES collaborators                                                                       |
| Gina                              | van Vemde     |                       |                  | Isala Klinieken                      | Zwolle, the Netherlands                  | Research nurse / local trial coordinator MR CLEAN       | HERMES collaborators                                                                       |
| Ans                               | de Ridder     |                       |                  | University Medical Center Utrecht    | Utrecht, the Netherlands                 | Research nurse / local trial coordinator MR CLEAN       | HERMES collaborators                                                                       |
| Paut                              | Greebe        |                       |                  | University Medical Center Utrecht    | Utrecht, the Netherlands                 | Research nurse / local trial coordinator MR CLEAN       | HERMES collaborators                                                                       |
| Tiny                              | Simons        |                       |                  | Atrium Medical Center                | Heerlen, the Netherlands                 | Research nurse / local trial coordinator MR CLEAN       | HERMES collaborators                                                                       |
| Gert                              | Messchendorp  |                       |                  | University Medical Center Groningen  | Groningen, the Netherlands               | Research nurse / local trial coordinator MR CLEAN       | HERMES collaborators                                                                       |
| Friedus                           | van der Minne |                       |                  | University Medical Center Groningen  | Groningen, the Netherlands               | Research nurse / local trial coordinator MR CLEAN       | HERMES collaborators                                                                       |
| Nicole                            | Aaldering     |                       |                  | Rijnstate Hospital                   | Arnhem, the Netherlands                  | Research nurse / local trial coordinator MR CLEAN       | HERMES collaborators                                                                       |

## Supplemental Online Content: Nonauthor Collaborators

\*First name, last name, and suffix (if applicable) are required and will appear in PubMed.

| *First Name and Middle Initial(s) | *Last Name            | *Suffix (eg, Jr, III) | Academic Degrees | Institution                          | Location (city, state/province, country) | Role or Contribution, eg, chair, principal investigator | Group (if more than 1 Group listed in the byline) and/or Subgroup (eg, Steering Committee) |
|-----------------------------------|-----------------------|-----------------------|------------------|--------------------------------------|------------------------------------------|---------------------------------------------------------|--------------------------------------------------------------------------------------------|
| Marjan                            | Elfrink               |                       |                  | Rijnstate Hospital                   | Arnhem, the Netherlands                  | Research nurse / local trial coordinator MR CLEAN       | HERMES collaborators                                                                       |
| José                              | de Bont-Stikkelbroeck |                       |                  | Sint Elisabeth Hospital              | Tilburg, the Netherlands                 | Research nurse / local trial coordinator MR CLEAN       | HERMES collaborators                                                                       |
| Joke                              | de Meris              |                       |                  | MC Haaglanden                        | the Hague, the Netherlands               | Research nurse / local trial coordinator MR CLEAN       | HERMES collaborators                                                                       |
| Kirsten                           | Janssen               |                       |                  | Leiden University Medical Center     | Leiden, the Netherlands                  | Research nurse / local trial coordinator MR CLEAN       | HERMES collaborators                                                                       |
| Willy                             | Struijk               |                       |                  | HAGA hospital                        | the Hague, the Netherlands               | Research nurse / local trial coordinator MR CLEAN       | HERMES collaborators                                                                       |
| Hester                            | Bongenaar             |                       |                  | Catharina Hospital                   | Eindhoven, the Netherlands               | Research nurse / local trial coordinator MR CLEAN       | HERMES collaborators                                                                       |
| Karin                             | Bodde                 |                       |                  | Reinier de Graaf Gasthuis            | Delft, the Netherlands                   | Research nurse / local trial coordinator MR CLEAN       | HERMES collaborators                                                                       |
| Silvan                            | Licher                |                       |                  | Erasmus MC University Medical Center | Rotterdam, the Netherlands               | PhD / Medical students MR CLEAN                         | HERMES collaborators                                                                       |
| Nikki                             | Boodt                 |                       |                  | Erasmus MC University Medical Center | Rotterdam, the Netherlands               | PhD / Medical students MR CLEAN                         | HERMES collaborators                                                                       |
| Adriaan                           | Ros                   |                       |                  | Erasmus MC University Medical Center | Rotterdam, the Netherlands               | PhD / Medical students MR CLEAN                         | HERMES collaborators                                                                       |
| Esmee                             | Venema                |                       |                  | Erasmus MC University Medical Center | Rotterdam, the Netherlands               | PhD / Medical students MR CLEAN                         | HERMES collaborators                                                                       |
| Ilse                              | Slokkers              |                       |                  | Erasmus MC University Medical Center | Rotterdam, the Netherlands               | PhD / Medical students MR CLEAN                         | HERMES collaborators                                                                       |
| Raymie-Jayce                      | Ganpat                |                       |                  | Erasmus MC University Medical Center | Rotterdam, the Netherlands               | PhD / Medical students MR CLEAN                         | HERMES collaborators                                                                       |
| Maxim                             | Mulder                |                       |                  | Erasmus MC University Medical Center | Rotterdam, the Netherlands               | PhD / Medical students MR CLEAN                         | HERMES collaborators                                                                       |
| Nawid                             | Saiedie               |                       |                  | Erasmus MC University Medical Center | Rotterdam, the Netherlands               | PhD / Medical students MR CLEAN                         | HERMES collaborators                                                                       |
| Alis                              | Hesmatollah           |                       |                  | Erasmus MC University Medical Center | Rotterdam, the Netherlands               | PhD / Medical students MR CLEAN                         | HERMES collaborators                                                                       |

## Supplemental Online Content: Nonauthor Collaborators

\*First name, last name, and suffix (if applicable) are required and will appear in PubMed.

| *First Name and Middle Initial(s) | *Last Name   | *Suffix (eg, Jr, III) | Academic Degrees | Institution                          | Location (city, state/province, country) | Role or Contribution, eg, chair, principal investigator | Group (if more than 1 Group listed in the byline) and/or Subgroup (eg, Steering Committee) |
|-----------------------------------|--------------|-----------------------|------------------|--------------------------------------|------------------------------------------|---------------------------------------------------------|--------------------------------------------------------------------------------------------|
| Stefanie                          | Schipperen   |                       |                  | Erasmus MC University Medical Center | Rotterdam, the Netherlands               | PhD / Medical students MR CLEAN                         | HERMES collaborators                                                                       |
| Stefan                            | Vinken       |                       |                  | Erasmus MC University Medical Center | Rotterdam, the Netherlands               | PhD / Medical students MR CLEAN                         | HERMES collaborators                                                                       |
| Tiemen                            | van Boxel    |                       |                  | Erasmus MC University Medical Center | Rotterdam, the Netherlands               | PhD / Medical students MR CLEAN                         | HERMES collaborators                                                                       |
| Jeroen                            | Koets        |                       |                  | Erasmus MC University Medical Center | Rotterdam, the Netherlands               | PhD / Medical students MR CLEAN                         | HERMES collaborators                                                                       |
| Merel                             | Broers       |                       |                  | Academic Medical Center Amsterdam    | Amsterdam, the Netherlands               | PhD / Medical students MR CLEAN                         | HERMES collaborators                                                                       |
| Emilie                            | Santos       |                       |                  | Academic Medical Center Amsterdam    | Amsterdam, the Netherlands               | PhD / Medical students MR CLEAN                         | HERMES collaborators                                                                       |
| Jordi                             | Borst        |                       |                  | Academic Medical Center Amsterdam    | Amsterdam, the Netherlands               | PhD / Medical students MR CLEAN                         | HERMES collaborators                                                                       |
| Ivo                               | Jansen       |                       |                  | Academic Medical Center Amsterdam    | Amsterdam, the Netherlands               | PhD / Medical students MR CLEAN                         | HERMES collaborators                                                                       |
| Manon                             | Kappelhof    |                       |                  | Academic Medical Center Amsterdam    | Amsterdam, the Netherlands               | PhD / Medical students MR CLEAN                         | HERMES collaborators                                                                       |
| Marit                             | Lucas        |                       |                  | Academic Medical Center Amsterdam    | Amsterdam, the Netherlands               | PhD / Medical students MR CLEAN                         | HERMES collaborators                                                                       |
| Ralph                             | Geuskens     |                       |                  | Academic Medical Center Amsterdam    | Amsterdam, the Netherlands               | PhD / Medical students MR CLEAN                         | HERMES collaborators                                                                       |
| Renan                             | Sales Barros |                       |                  | Academic Medical Center Amsterdam    | Amsterdam, the Netherlands               | PhD / Medical students MR CLEAN                         | HERMES collaborators                                                                       |



## Supplemental Online Content: Nonauthor Collaborators

\*First name, last name, and suffix (if applicable) are required and will appear in PubMed.

| *First Name and Middle Initial(s) | *Last Name | *Suffix (eg, Jr, III) | Academic Degrees | Institution                          | Location (city, state/province, country) | Role or Contribution, eg, chair, principal investigator                              | Group (if more than 1 Group listed in the byline) and/or Subgroup (eg, Steering Committee) |
|-----------------------------------|------------|-----------------------|------------------|--------------------------------------|------------------------------------------|--------------------------------------------------------------------------------------|--------------------------------------------------------------------------------------------|
| Roeland                           | Dobbe      |                       |                  | Academic Medical Center<br>Amsterdam | Amsterdam, the Netherlands               | PhD / Medical students MR<br>CLEAN                                                   | HERMES collaborators                                                                       |
| Marloes                           | Csizmadia  |                       |                  | Academic Medical Center<br>Amsterdam | Amsterdam, the Netherlands               | PhD / Medical students MR<br>CLEAN                                                   | HERMES collaborators                                                                       |
| M.D.                              | Hill       |                       |                  | University of Calgary                | Calgary, Canada                          | ESCAPE Trial Co-PI, steering committee, site PI                                      | HERMES collaborators                                                                       |
| Mayank                            | Goyal      |                       |                  | University of Calgary                | Calgary, Canada                          | ESCAPE Trial Co-PI, steering committee, chairperson neurovascular committee, site PI | HERMES collaborators                                                                       |
| Andrew M.                         | Demchuk    |                       |                  | University of Calgary                | Calgary, Canada                          | ESCAPE Trial Co-PI, steering committee                                               | HERMES collaborators                                                                       |
| Bijoy K.                          | Menon      |                       |                  | University of Calgary                | Calgary, Canada                          | ESCAPE Trial Steering committee                                                      | HERMES collaborators                                                                       |
| M.                                | Eesa       |                       |                  | University of Calgary                | Calgary, Canada                          | ESCAPE Trial Investigator                                                            | HERMES collaborators                                                                       |
| K.J.                              | Ryckborst  |                       |                  | University of Calgary                | Calgary, Canada                          | ESCAPE Trial Steering committee, primary study coordinator                           | HERMES collaborators                                                                       |
| M.R.                              | Wright     |                       |                  | University of Calgary                | Calgary, Canada                          | ESCAPE Trial Investigator                                                            | HERMES collaborators                                                                       |
| N.R.                              | Kamal      |                       |                  | University of Calgary                | Calgary, Canada                          | ESCAPE Trial Steering committee                                                      | HERMES collaborators                                                                       |
| L.                                | Andersen   |                       |                  | University of Calgary                | Calgary, Canada                          | ESCAPE Trial Investigator                                                            | HERMES collaborators                                                                       |
| P.A.                              | Randhawa   |                       |                  | University of Calgary                | Calgary, Canada                          | ESCAPE Trial Investigator                                                            | HERMES collaborators                                                                       |
| T.                                | Stewart    |                       |                  | University of Calgary                | Calgary, Canada                          | ESCAPE Trial primary study coordinator                                               | HERMES collaborators                                                                       |

## Supplemental Online Content: Nonauthor Collaborators

\*First name, last name, and suffix (if applicable) are required and will appear in PubMed.

| *First Name and Middle Initial(s) | *Last Name | *Suffix (eg, Jr, III) | Academic Degrees | Institution           | Location (city, state/province, country) | Role or Contribution, eg, chair, principal investigator | Group (if more than 1 Group listed in the byline) and/or Subgroup (eg, Steering Committee) |
|-----------------------------------|------------|-----------------------|------------------|-----------------------|------------------------------------------|---------------------------------------------------------|--------------------------------------------------------------------------------------------|
| S.                                | Patil      |                       |                  | University of Calgary | Calgary, Canada                          | ESCAPE Trial Investigator                               | HERMES collaborators                                                                       |
| P.                                | Minhas     |                       |                  | University of Calgary | Calgary, Canada                          | ESCAPE Trial Investigator                               | HERMES collaborators                                                                       |
| Mohammed A.                       | Almekhlafi |                       |                  | University of Calgary | Calgary, Canada                          | ESCAPE Trial Investigator, site investigator            | HERMES collaborators                                                                       |
| S.                                | Mishra     |                       |                  | University of Calgary | Calgary, Canada                          | ESCAPE Trial Investigator                               | HERMES collaborators                                                                       |
| F.                                | Clement    |                       |                  | University of Calgary | Calgary, Canada                          | ESCAPE Trial Investigator                               | HERMES collaborators                                                                       |
| T.                                | Sajobi     |                       |                  | University of Calgary | Calgary, Canada                          | ESCAPE trial Biostatistician, clinical research unit    | HERMES collaborators                                                                       |
| A.                                | Shuaib     |                       |                  | University of Calgary | Calgary, Canada                          | ESCAPE Trial Steering committee                         | HERMES collaborators                                                                       |
| W.J.                              | Montanera  |                       |                  | University of Calgary | Calgary, Canada                          | ESCAPE Trial Steering committee                         | HERMES collaborators                                                                       |
| D.                                | Roy        |                       |                  | University of Calgary | Calgary, Canada                          | ESCAPE Trial Steering committee                         | HERMES collaborators                                                                       |
| F.L.                              | Silver     |                       |                  | University of Calgary | Calgary, Canada                          | ESCAPE Trial Steering committee                         | HERMES collaborators                                                                       |
| T.G.                              | Jovin      |                       |                  | University of Calgary | Calgary, Canada                          | ESCAPE Trial Steering committee                         | HERMES collaborators                                                                       |
| D.F.                              | Frei       |                       |                  | University of Calgary | Calgary, Canada                          | ESCAPE Trial Steering committee                         | HERMES collaborators                                                                       |
| B.                                | Sapkota    |                       |                  | University of Calgary | Calgary, Canada                          | ESCAPE Trial Steering committee                         | HERMES collaborators                                                                       |
| J.L.                              | Rempel     |                       |                  | University of Calgary | Calgary, Canada                          | ESCAPE Trial Steering committee                         | HERMES collaborators                                                                       |
| J.                                | Thornton   |                       |                  | University of Calgary | Calgary, Canada                          | ESCAPE Trial Steering committee                         | HERMES collaborators                                                                       |
| D.                                | Williams   |                       |                  | University of Calgary | Calgary, Canada                          | ESCAPE Trial Steering committee                         | HERMES collaborators                                                                       |

## Supplemental Online Content: Nonauthor Collaborators

\*First name, last name, and suffix (if applicable) are required and will appear in PubMed.

| *First Name and Middle Initial(s) | *Last Name  | *Suffix (eg, Jr, III) | Academic Degrees | Institution           | Location (city, state/province, country) | Role or Contribution, eg, chair, principal investigator | Group (if more than 1 Group listed in the byline) and/or Subgroup (eg, Steering Committee) |
|-----------------------------------|-------------|-----------------------|------------------|-----------------------|------------------------------------------|---------------------------------------------------------|--------------------------------------------------------------------------------------------|
| D.                                | Tampieri    |                       |                  | University of Calgary | Calgary, Canada                          | ESCAPE Trial Steering committee                         | HERMES collaborators                                                                       |
| A.Y.                              | Poppe       |                       |                  | University of Calgary | Calgary, Canada                          | ESCAPE Trial Steering committee                         | HERMES collaborators                                                                       |
| D.                                | Dowlatshahi |                       |                  | University of Calgary | Calgary, Canada                          | ESCAPE Trial Steering committee                         | HERMES collaborators                                                                       |
| J.H.                              | Wong        |                       |                  | University of Calgary | Calgary, Canada                          | ESCAPE trial Neurovascular committee                    | HERMES collaborators                                                                       |
| A.P.                              | Mitha       |                       |                  | University of Calgary | Calgary, Canada                          | ESCAPE trial Neurovascular committee                    | HERMES collaborators                                                                       |
| S.                                | Subramaniam |                       |                  | University of Calgary | Calgary, Canada                          | ESCAPE trial Neurovascular committee                    | HERMES collaborators                                                                       |
| M.W.                              | Lowerison   |                       |                  | University of Calgary | Calgary, Canada                          | ESCAPE trial Clinical research unit                     | HERMES collaborators                                                                       |
| M.                                | Salluzzi    |                       |                  | University of Calgary | Calgary, Canada                          | ESCAPE Trial Investigator                               | HERMES collaborators                                                                       |
| M.                                | Maxwell     |                       |                  | University of Calgary | Calgary, Canada                          | ESCAPE Trial Investigator                               | HERMES collaborators                                                                       |
| S.                                | Lacusta     |                       |                  | University of Calgary | Calgary, Canada                          | ESCAPE Trial Investigator                               | HERMES collaborators                                                                       |
| E.                                | Drupals     |                       |                  | University of Calgary | Calgary, Canada                          | ESCAPE Trial Investigator                               | HERMES collaborators                                                                       |
| K.                                | Armitage    |                       |                  | University of Calgary | Calgary, Canada                          | ESCAPE Trial Investigator                               | HERMES collaborators                                                                       |
| P.A.                              | Barber      |                       |                  | University of Calgary | Calgary, Canada                          | ESCAPE Trial Investigator                               | HERMES collaborators                                                                       |
| E.E.                              | Smith       |                       |                  | University of Calgary | Calgary, Canada                          | ESCAPE Trial Investigator                               | HERMES collaborators                                                                       |
| W.F.                              | Morrish     |                       |                  | University of Calgary | Calgary, Canada                          | ESCAPE Trial Investigator                               | HERMES collaborators                                                                       |
| S.B.                              | Coutts      |                       |                  | University of Calgary | Calgary, Canada                          | ESCAPE Trial Investigator                               | HERMES collaborators                                                                       |

## Supplemental Online Content: Nonauthor Collaborators

\*First name, last name, and suffix (if applicable) are required and will appear in PubMed.

| *First Name and Middle Initial(s) | *Last Name   | *Suffix (eg, Jr, III) | Academic Degrees | Institution           | Location (city, state/province, country) | Role or Contribution, eg, chair, principal investigator | Group (if more than 1 Group listed in the byline) and/or Subgroup (eg, Steering Committee) |
|-----------------------------------|--------------|-----------------------|------------------|-----------------------|------------------------------------------|---------------------------------------------------------|--------------------------------------------------------------------------------------------|
| C.                                | Derdeyn      |                       |                  | University of Calgary | Calgary, Canada                          | ESCAPE Trial Investigator                               | HERMES collaborators                                                                       |
| B.                                | Demaerschalk |                       |                  | University of Calgary | Calgary, Canada                          | ESCAPE Trial Investigator                               | HERMES collaborators                                                                       |
| D.                                | Yavagal      |                       |                  | University of Calgary | Calgary, Canada                          | ESCAPE Trial Investigator                               | HERMES collaborators                                                                       |
| R.                                | Martin       |                       |                  | University of Calgary | Calgary, Canada                          | ESCAPE Trial Biostatistician                            | HERMES collaborators                                                                       |
| R.                                | Brant        |                       |                  | University of Calgary | Calgary, Canada                          | ESCAPE Trial Independent blinded statistician           | HERMES collaborators                                                                       |
| Y.                                | Yu           |                       |                  | University of Calgary | Calgary, Canada                          | ESCAPE Trial Independent blinded statistician           | HERMES collaborators                                                                       |
| R.A.                              | Willinsky    |                       |                  | University of Calgary | Calgary, Canada                          | ESCAPE Trial Investigator                               | HERMES collaborators                                                                       |
| A.                                | Weill        |                       |                  | University of Calgary | Calgary, Canada                          | ESCAPE Trial Investigator                               | HERMES collaborators                                                                       |
| C.                                | Kenney       |                       |                  | University of Calgary | Calgary, Canada                          | ESCAPE Trial Primary study coordinator                  | HERMES collaborators                                                                       |
| H.                                | Aram         |                       |                  | University of Calgary | Calgary, Canada                          | ESCAPE Trial Primary study coordinator                  | HERMES collaborators                                                                       |
| P.K.                              | Stys         |                       |                  | University of Calgary | Calgary, Canada                          | ESCAPE Trial Site investigator                          | HERMES collaborators                                                                       |
| T.W.                              | Watson       |                       |                  | University of Calgary | Calgary, Canada                          | ESCAPE Trial Site investigator                          | HERMES collaborators                                                                       |
| G.                                | Klein        |                       |                  | University of Calgary | Calgary, Canada                          | ESCAPE Trial Site investigator                          | HERMES collaborators                                                                       |
| D.                                | Pearson      |                       |                  | University of Calgary | Calgary, Canada                          | ESCAPE Trial Site investigator                          | HERMES collaborators                                                                       |
| P.                                | Couillard    |                       |                  | University of Calgary | Calgary, Canada                          | ESCAPE Trial Site investigator                          | HERMES collaborators                                                                       |
| A.                                | Trivedi      |                       |                  | University of Calgary | Calgary, Canada                          | ESCAPE Trial Site investigator                          | HERMES collaborators                                                                       |

## Supplemental Online Content: Nonauthor Collaborators

\*First name, last name, and suffix (if applicable) are required and will appear in PubMed.

| *First Name and Middle Initial(s) | *Last Name | *Suffix (eg, Jr, III) | Academic Degrees | Institution           | Location (city, state/province, country) | Role or Contribution, eg, chair, principal investigator | Group (if more than 1 Group listed in the byline) and/or Subgroup (eg, Steering Committee) |
|-----------------------------------|------------|-----------------------|------------------|-----------------------|------------------------------------------|---------------------------------------------------------|--------------------------------------------------------------------------------------------|
| D.                                | Singh      |                       |                  | University of Calgary | Calgary, Canada                          | ESCAPE Trial Site investigator                          | HERMES collaborators                                                                       |
| E.                                | Klourfeld  |                       |                  | University of Calgary | Calgary, Canada                          | ESCAPE Trial Site investigator                          | HERMES collaborators                                                                       |
| O.                                | Imoukhuede |                       |                  | University of Calgary | Calgary, Canada                          | ESCAPE Trial Site investigator                          | HERMES collaborators                                                                       |
| D.                                | Nikneshan  |                       |                  | University of Calgary | Calgary, Canada                          | ESCAPE Trial Site investigator                          | HERMES collaborators                                                                       |
| S.                                | Blayney    |                       |                  | University of Calgary | Calgary, Canada                          | ESCAPE Trial Site investigator                          | HERMES collaborators                                                                       |
| R.                                | Reddy      |                       |                  | University of Calgary | Calgary, Canada                          | ESCAPE Trial Site investigator                          | HERMES collaborators                                                                       |
| P.                                | Choi       |                       |                  | University of Calgary | Calgary, Canada                          | ESCAPE Trial Site investigator                          | HERMES collaborators                                                                       |
| M.                                | Horton     |                       |                  | University of Calgary | Calgary, Canada                          | ESCAPE Trial Site investigator                          | HERMES collaborators                                                                       |
| T.                                | Musuka     |                       |                  | University of Calgary | Calgary, Canada                          | ESCAPE Trial Site investigator                          | HERMES collaborators                                                                       |
| V.                                | Dubuc      |                       |                  | University of Calgary | Calgary, Canada                          | ESCAPE Trial Site investigator                          | HERMES collaborators                                                                       |
| T.S.                              | Field      |                       |                  | University of Calgary | Calgary, Canada                          | ESCAPE Trial Site investigator                          | HERMES collaborators                                                                       |
| J.                                | Desai      |                       |                  | University of Calgary | Calgary, Canada                          | ESCAPE Trial Site investigator                          | HERMES collaborators                                                                       |
| S.                                | Adatia     |                       |                  | University of Calgary | Calgary, Canada                          | ESCAPE Trial Site investigator                          | HERMES collaborators                                                                       |
| A.                                | Alseraya   |                       |                  | University of Calgary | Calgary, Canada                          | ESCAPE Trial Site investigator                          | HERMES collaborators                                                                       |
| V.                                | Nambiar    |                       |                  | University of Calgary | Calgary, Canada                          | ESCAPE Trial Site investigator                          | HERMES collaborators                                                                       |
| S.                                | Mishra     |                       |                  | University of Calgary | Calgary, Canada                          | ESCAPE Trial Site investigator                          | HERMES collaborators                                                                       |

## Supplemental Online Content: Nonauthor Collaborators

\*First name, last name, and suffix (if applicable) are required and will appear in PubMed.

| *First Name and Middle Initial(s) | *Last Name  | *Suffix (eg, Jr, III) | Academic Degrees | Institution                    | Location (city, state/province, country) | Role or Contribution, eg, chair, principal investigator | Group (if more than 1 Group listed in the byline) and/or Subgroup (eg, Steering Committee) |
|-----------------------------------|-------------|-----------------------|------------------|--------------------------------|------------------------------------------|---------------------------------------------------------|--------------------------------------------------------------------------------------------|
| R.                                | van Dijk    |                       |                  | University of Calgary          | Calgary, Canada                          | ESCAPE Trial Site investigator                          | HERMES collaborators                                                                       |
| N.J.                              | Newcommon   |                       |                  | University of Calgary          | Calgary, Canada                          | ESCAPE Trial Site investigator                          | HERMES collaborators                                                                       |
| A.                                | Shuaib      |                       |                  | University of Alberta Hospital | Edmonton, Canada                         | ESCAPE Trial Site PI                                    | HERMES collaborators                                                                       |
| J.L.                              | Rempel      |                       |                  | University of Alberta Hospital | Edmonton, Canada                         | ESCAPE Trial Site PI                                    | HERMES collaborators                                                                       |
| B.                                | Schwindt    |                       |                  | University of Alberta Hospital | Edmonton, Canada                         | ESCAPE Trial Primary study coordinator                  | HERMES collaborators                                                                       |
| K.                                | Butcher     |                       |                  | University of Alberta Hospital | Edmonton, Canada                         | ESCAPE Trial Site investigator                          | HERMES collaborators                                                                       |
| T.                                | Jeerakathil |                       |                  | University of Alberta Hospital | Edmonton, Canada                         | ESCAPE Trial Site investigator                          | HERMES collaborators                                                                       |
| B.                                | Buck        |                       |                  | University of Alberta Hospital | Edmonton, Canada                         | ESCAPE Trial Site investigator                          | HERMES collaborators                                                                       |
| K.                                | Khan        |                       |                  | University of Alberta Hospital | Edmonton, Canada                         | ESCAPE Trial Site investigator                          | HERMES collaborators                                                                       |
| S.S.                              | Naik        |                       |                  | University of Alberta Hospital | Edmonton, Canada                         | ESCAPE Trial Site investigator                          | HERMES collaborators                                                                       |
| D.J.                              | Emery       |                       |                  | University of Alberta Hospital | Edmonton, Canada                         | ESCAPE Trial Site investigator                          | HERMES collaborators                                                                       |
| R.J.                              | Owen        |                       |                  | University of Alberta Hospital | Edmonton, Canada                         | ESCAPE Trial Site investigator                          | HERMES collaborators                                                                       |
| T.B.                              | Kotylak     |                       |                  | University of Alberta Hospital | Edmonton, Canada                         | ESCAPE Trial Site investigator                          | HERMES collaborators                                                                       |
| R.A.                              | Ashforth    |                       |                  | University of Alberta Hospital | Edmonton, Canada                         | ESCAPE Trial Site investigator                          | HERMES collaborators                                                                       |
| T.A.                              | Yeo         |                       |                  | University of Alberta Hospital | Edmonton, Canada                         | ESCAPE Trial Site investigator                          | HERMES collaborators                                                                       |
| D.                                | McNally     |                       |                  | University of Alberta Hospital | Edmonton, Canada                         | ESCAPE Trial Site investigator                          | HERMES collaborators                                                                       |

## Supplemental Online Content: Nonauthor Collaborators

\*First name, last name, and suffix (if applicable) are required and will appear in PubMed.

| *First Name and Middle Initial(s) | *Last Name | *Suffix (eg, Jr, III) | Academic Degrees | Institution                                     | Location (city, state/province, country) | Role or Contribution, eg, chair, principal investigator | Group (if more than 1 Group listed in the byline) and/or Subgroup (eg, Steering Committee) |
|-----------------------------------|------------|-----------------------|------------------|-------------------------------------------------|------------------------------------------|---------------------------------------------------------|--------------------------------------------------------------------------------------------|
| M.                                | Siddiqui   |                       |                  | University of Alberta Hospital                  | Edmonton, Canada                         | ESCAPE Trial Site investigator                          | HERMES collaborators                                                                       |
| M.                                | Saqqur     |                       |                  | University of Alberta Hospital                  | Edmonton, Canada                         | ESCAPE Trial Site investigator                          | HERMES collaborators                                                                       |
| D.                                | Hussain    |                       |                  | University of Alberta Hospital                  | Edmonton, Canada                         | ESCAPE Trial Site investigator                          | HERMES collaborators                                                                       |
| H.                                | Kalashyan  |                       |                  | University of Alberta Hospital                  | Edmonton, Canada                         | ESCAPE Trial Site investigator                          | HERMES collaborators                                                                       |
| A.                                | Manosalva  |                       |                  | University of Alberta Hospital                  | Edmonton, Canada                         | ESCAPE Trial Site investigator                          | HERMES collaborators                                                                       |
| M.                                | Kate       |                       |                  | University of Alberta Hospital                  | Edmonton, Canada                         | ESCAPE Trial Site investigator                          | HERMES collaborators                                                                       |
| L.                                | Gioia      |                       |                  | University of Alberta Hospital                  | Edmonton, Canada                         | ESCAPE Trial Site investigator                          | HERMES collaborators                                                                       |
| S.                                | Hasan      |                       |                  | University of Alberta Hospital                  | Edmonton, Canada                         | ESCAPE Trial Site investigator                          | HERMES collaborators                                                                       |
| A.                                | Mohammad   |                       |                  | University of Alberta Hospital                  | Edmonton, Canada                         | ESCAPE Trial Site investigator                          | HERMES collaborators                                                                       |
| M.                                | Muratoglu  |                       |                  | University of Alberta Hospital                  | Edmonton, Canada                         | ESCAPE Trial Site investigator                          | HERMES collaborators                                                                       |
| D.                                | Williams   |                       |                  | Beaumont Hospital and Royal College of Surgeons | Dublin, Ireland                          | ESCAPE Trial Site PI                                    | HERMES collaborators                                                                       |
| J.                                | Thornton   |                       |                  | Beaumont Hospital and Royal College of Surgeons | Dublin, Ireland                          | ESCAPE Trial Site PI                                    | HERMES collaborators                                                                       |
| A.                                | Cullen     |                       |                  | Beaumont Hospital and Royal College of Surgeons | Dublin, Ireland                          | ESCAPE Trial Primary study coordinator                  | HERMES collaborators                                                                       |
| P.                                | Brennan    |                       |                  | Beaumont Hospital and Royal College of Surgeons | Dublin, Ireland                          | ESCAPE Trial Site investigator                          | HERMES collaborators                                                                       |
| A.                                | O Hare     |                       |                  | Beaumont Hospital and Royal College of Surgeons | Dublin, Ireland                          | ESCAPE Trial Site investigator                          | HERMES collaborators                                                                       |
| S.                                | Looby      |                       |                  | Beaumont Hospital and Royal College of Surgeons | Dublin, Ireland                          | ESCAPE Trial Site investigator                          | HERMES collaborators                                                                       |

## Supplemental Online Content: Nonauthor Collaborators

\*First name, last name, and suffix (if applicable) are required and will appear in PubMed.

| *First Name and Middle Initial(s) | *Last Name | *Suffix (eg, Jr, III) | Academic Degrees | Institution                                     | Location (city, state/province, country) | Role or Contribution, eg, chair, principal investigator | Group (if more than 1 Group listed in the byline) and/or Subgroup (eg, Steering Committee) |
|-----------------------------------|------------|-----------------------|------------------|-------------------------------------------------|------------------------------------------|---------------------------------------------------------|--------------------------------------------------------------------------------------------|
| D.                                | Hyland     |                       |                  | Beaumont Hospital and Royal College of Surgeons | Dublin, Ireland                          | ESCAPE Trial Site investigator                          | HERMES collaborators                                                                       |
| A.                                | Cullen     |                       |                  | Beaumont Hospital and Royal College of Surgeons | Dublin, Ireland                          | ESCAPE Trial Site investigator                          | HERMES collaborators                                                                       |
| S.                                | Duff       |                       |                  | Beaumont Hospital and Royal College of Surgeons | Dublin, Ireland                          | ESCAPE Trial Site investigator                          | HERMES collaborators                                                                       |
| M.                                | Mc Cusker  |                       |                  | Beaumont Hospital and Royal College of Surgeons | Dublin, Ireland                          | ESCAPE Trial Site investigator                          | HERMES collaborators                                                                       |
| B.                                | Hallinan   |                       |                  | Beaumont Hospital and Royal College of Surgeons | Dublin, Ireland                          | ESCAPE Trial Site investigator                          | HERMES collaborators                                                                       |
| S.                                | Lee        |                       |                  | Beaumont Hospital and Royal College of Surgeons | Dublin, Ireland                          | ESCAPE Trial Site investigator                          | HERMES collaborators                                                                       |
| J.                                | Mc Cormack |                       |                  | Beaumont Hospital and Royal College of Surgeons | Dublin, Ireland                          | ESCAPE Trial Site investigator                          | HERMES collaborators                                                                       |
| A.                                | Moore      |                       |                  | Beaumont Hospital and Royal College of Surgeons | Dublin, Ireland                          | ESCAPE Trial Site investigator                          | HERMES collaborators                                                                       |
| M.                                | O'Connor   |                       |                  | Beaumont Hospital and Royal College of Surgeons | Dublin, Ireland                          | ESCAPE Trial Site investigator                          | HERMES collaborators                                                                       |
| C.                                | Donegan    |                       |                  | Beaumont Hospital and Royal College of Surgeons | Dublin, Ireland                          | ESCAPE Trial Site investigator                          | HERMES collaborators                                                                       |
| L.                                | Brewer     |                       |                  | Beaumont Hospital and Royal College of Surgeons | Dublin, Ireland                          | ESCAPE Trial Site investigator                          | HERMES collaborators                                                                       |
| A.                                | Martin     |                       |                  | Beaumont Hospital and Royal College of Surgeons | Dublin, Ireland                          | ESCAPE Trial Site investigator                          | HERMES collaborators                                                                       |
| S.                                | Murphy     |                       |                  | Beaumont Hospital and Royal College of Surgeons | Dublin, Ireland                          | ESCAPE Trial Site investigator                          | HERMES collaborators                                                                       |
| K.                                | O'Rourke   |                       |                  | Beaumont Hospital and Royal College of Surgeons | Dublin, Ireland                          | ESCAPE Trial Site investigator                          | HERMES collaborators                                                                       |
| S.                                | Smyth      |                       |                  | Beaumont Hospital and Royal College of Surgeons | Dublin, Ireland                          | ESCAPE Trial Site investigator                          | HERMES collaborators                                                                       |
| P.                                | Kelly      |                       |                  | Beaumont Hospital and Royal College of Surgeons | Dublin, Ireland                          | ESCAPE Trial Site investigator                          | HERMES collaborators                                                                       |



## Supplemental Online Content: Nonauthor Collaborators

\*First name, last name, and suffix (if applicable) are required and will appear in PubMed.

| *First Name and Middle Initial(s) | *Last Name | *Suffix (eg, Jr, III) | Academic Degrees | Institution                                     | Location (city, state/province, country) | Role or Contribution, eg, chair, principal investigator | Group (if more than 1 Group listed in the byline) and/or Subgroup (eg, Steering Committee) |
|-----------------------------------|------------|-----------------------|------------------|-------------------------------------------------|------------------------------------------|---------------------------------------------------------|--------------------------------------------------------------------------------------------|
| T.                                | Lynch      |                       |                  | Beaumont Hospital and Royal College of Surgeons | Dublin, Ireland                          | ESCAPE Trial Site investigator                          | HERMES collaborators                                                                       |
| T.                                | Daly       |                       |                  | Beaumont Hospital and Royal College of Surgeons | Dublin, Ireland                          | ESCAPE Trial Site investigator                          | HERMES collaborators                                                                       |
| P.                                | O'Brien    |                       |                  | Beaumont Hospital and Royal College of Surgeons | Dublin, Ireland                          | ESCAPE Trial Site investigator                          | HERMES collaborators                                                                       |
| A.                                | O'Driscoll |                       |                  | Beaumont Hospital and Royal College of Surgeons | Dublin, Ireland                          | ESCAPE Trial Site investigator                          | HERMES collaborators                                                                       |
| M.                                | Martin     |                       |                  | Beaumont Hospital and Royal College of Surgeons | Dublin, Ireland                          | ESCAPE Trial Site investigator                          | HERMES collaborators                                                                       |
| R.                                | Collins    |                       |                  | Beaumont Hospital and Royal College of Surgeons | Dublin, Ireland                          | ESCAPE Trial Site investigator                          | HERMES collaborators                                                                       |
| T.                                | Coughlan   |                       |                  | Beaumont Hospital and Royal College of Surgeons | Dublin, Ireland                          | ESCAPE Trial Site investigator                          | HERMES collaborators                                                                       |
| D.                                | McCabe     |                       |                  | Beaumont Hospital and Royal College of Surgeons | Dublin, Ireland                          | ESCAPE Trial Site investigator                          | HERMES collaborators                                                                       |
| S.                                | Murphy     |                       |                  | Beaumont Hospital and Royal College of Surgeons | Dublin, Ireland                          | ESCAPE Trial Site investigator                          | HERMES collaborators                                                                       |
| D.                                | O'Neill    |                       |                  | Beaumont Hospital and Royal College of Surgeons | Dublin, Ireland                          | ESCAPE Trial Site investigator                          | HERMES collaborators                                                                       |
| M.                                | Mulroy     |                       |                  | Beaumont Hospital and Royal College of Surgeons | Dublin, Ireland                          | ESCAPE Trial Site investigator                          | HERMES collaborators                                                                       |
| O.                                | Lynch      |                       |                  | Beaumont Hospital and Royal College of Surgeons | Dublin, Ireland                          | ESCAPE Trial Site investigator                          | HERMES collaborators                                                                       |
| T.                                | Walsh      |                       |                  | Beaumont Hospital and Royal College of Surgeons | Dublin, Ireland                          | ESCAPE Trial Site investigator                          | HERMES collaborators                                                                       |
| M.                                | O'Donnell  |                       |                  | Beaumont Hospital and Royal College of Surgeons | Dublin, Ireland                          | ESCAPE Trial Site investigator                          | HERMES collaborators                                                                       |
| T.                                | Galvin     |                       |                  | Beaumont Hospital and Royal College of Surgeons | Dublin, Ireland                          | ESCAPE Trial Site investigator                          | HERMES collaborators                                                                       |
| J.                                | Harbison   |                       |                  | Beaumont Hospital and Royal College of Surgeons | Dublin, Ireland                          | ESCAPE Trial Site investigator                          | HERMES collaborators                                                                       |

## Supplemental Online Content: Nonauthor Collaborators

\*First name, last name, and suffix (if applicable) are required and will appear in PubMed.

| *First Name and Middle Initial(s) | *Last Name | *Suffix (eg, Jr, III) | Academic Degrees | Institution                                     | Location (city, state/province, country) | Role or Contribution, eg, chair, principal investigator | Group (if more than 1 Group listed in the byline) and/or Subgroup (eg, Steering Committee) |
|-----------------------------------|------------|-----------------------|------------------|-------------------------------------------------|------------------------------------------|---------------------------------------------------------|--------------------------------------------------------------------------------------------|
| P.                                | McElwaine  |                       |                  | Beaumont Hospital and Royal College of Surgeons | Dublin, Ireland                          | ESCAPE Trial Site investigator                          | HERMES collaborators                                                                       |
| K.                                | Mulpeter   |                       |                  | Beaumont Hospital and Royal College of Surgeons | Dublin, Ireland                          | ESCAPE Trial Site investigator                          | HERMES collaborators                                                                       |
| C.                                | McLoughlin |                       |                  | Beaumont Hospital and Royal College of Surgeons | Dublin, Ireland                          | ESCAPE Trial Site investigator                          | HERMES collaborators                                                                       |
| M.                                | Raerdon    |                       |                  | Beaumont Hospital and Royal College of Surgeons | Dublin, Ireland                          | ESCAPE Trial Site investigator                          | HERMES collaborators                                                                       |
| E.                                | Harkin     |                       |                  | Beaumont Hospital and Royal College of Surgeons | Dublin, Ireland                          | ESCAPE Trial Site investigator                          | HERMES collaborators                                                                       |
| E.                                | Dolan      |                       |                  | Beaumont Hospital and Royal College of Surgeons | Dublin, Ireland                          | ESCAPE Trial Site investigator                          | HERMES collaborators                                                                       |
| M.                                | Watts      |                       |                  | Beaumont Hospital and Royal College of Surgeons | Dublin, Ireland                          | ESCAPE Trial Site investigator                          | HERMES collaborators                                                                       |
| N.                                | Cunningham |                       |                  | Beaumont Hospital and Royal College of Surgeons | Dublin, Ireland                          | ESCAPE Trial Site investigator                          | HERMES collaborators                                                                       |
| C.                                | Fallon     |                       |                  | Beaumont Hospital and Royal College of Surgeons | Dublin, Ireland                          | ESCAPE Trial Site investigator                          | HERMES collaborators                                                                       |
| S.                                | Gallagher  |                       |                  | Beaumont Hospital and Royal College of Surgeons | Dublin, Ireland                          | ESCAPE Trial Site investigator                          | HERMES collaborators                                                                       |
| P.                                | Cotter     |                       |                  | Beaumont Hospital and Royal College of Surgeons | Dublin, Ireland                          | ESCAPE Trial Site investigator                          | HERMES collaborators                                                                       |
| M.                                | Crowe      |                       |                  | Beaumont Hospital and Royal College of Surgeons | Dublin, Ireland                          | ESCAPE Trial Site investigator                          | HERMES collaborators                                                                       |
| R.                                | Doyle      |                       |                  | Beaumont Hospital and Royal College of Surgeons | Dublin, Ireland                          | ESCAPE Trial Site investigator                          | HERMES collaborators                                                                       |
| I.                                | Noone      |                       |                  | Beaumont Hospital and Royal College of Surgeons | Dublin, Ireland                          | ESCAPE Trial Site investigator                          | HERMES collaborators                                                                       |
| A.Y.                              | Poppe      |                       |                  | CHUM-Hopital Notre Dame                         | Montreal, Canada                         | ESCAPE Trial Site PI                                    | HERMES collaborators                                                                       |
| D.                                | Roy        |                       |                  | CHUM-Hopital Notre Dame                         | Montreal, Canada                         | ESCAPE Trial Site PI                                    | HERMES collaborators                                                                       |

## Supplemental Online Content: Nonauthor Collaborators

\*First name, last name, and suffix (if applicable) are required and will appear in PubMed.

| *First Name and Middle Initial(s) | *Last Name     | *Suffix (eg, Jr, III) | Academic Degrees | Institution             | Location (city, state/province, country) | Role or Contribution, eg, chair, principal investigator | Group (if more than 1 Group listed in the byline) and/or Subgroup (eg, Steering Committee) |
|-----------------------------------|----------------|-----------------------|------------------|-------------------------|------------------------------------------|---------------------------------------------------------|--------------------------------------------------------------------------------------------|
| M.                                | Lapierre       |                       |                  | CHUM-Hopital Notre Dame | Montreal, Canada                         | ESCAPE Trial Primary study coordinator                  | HERMES collaborators                                                                       |
| V.A.                              | Coté           |                       |                  | CHUM-Hopital Notre Dame | Montreal, Canada                         | ESCAPE Trial Primary study coordinator                  | HERMES collaborators                                                                       |
| S.                                | Lanthier       |                       |                  | CHUM-Hopital Notre Dame | Montreal, Canada                         | ESCAPE Trial Site investigator                          | HERMES collaborators                                                                       |
| C.                                | Odier          |                       |                  | CHUM-Hopital Notre Dame | Montreal, Canada                         | ESCAPE Trial Site investigator                          | HERMES collaborators                                                                       |
| A.                                | Durocher       |                       |                  | CHUM-Hopital Notre Dame | Montreal, Canada                         | ESCAPE Trial Site investigator                          | HERMES collaborators                                                                       |
| J.                                | Raymond        |                       |                  | CHUM-Hopital Notre Dame | Montreal, Canada                         | ESCAPE Trial Site investigator                          | HERMES collaborators                                                                       |
| A.                                | Weill          |                       |                  | CHUM-Hopital Notre Dame | Montreal, Canada                         | ESCAPE Trial Site investigator                          | HERMES collaborators                                                                       |
| N.                                | Daneault       |                       |                  | CHUM-Hopital Notre Dame | Montreal, Canada                         | ESCAPE Trial Site investigator                          | HERMES collaborators                                                                       |
| Y.                                | Deschaintre    |                       |                  | CHUM-Hopital Notre Dame | Montreal, Canada                         | ESCAPE Trial Site investigator                          | HERMES collaborators                                                                       |
| T.                                | Jovin          |                       |                  | UPMC Medical Centre     | Pittsburgh                               | ESCAPE Trial Site PI                                    | HERMES collaborators                                                                       |
| B.                                | Jankowitz      |                       |                  | UPMC Medical Centre     | Pittsburgh                               | ESCAPE Trial Site PI                                    | HERMES collaborators                                                                       |
| L.                                | Baxendell      |                       |                  | UPMC Medical Centre     | Pittsburgh                               | ESCAPE Trial Primary study coordinator                  | HERMES collaborators                                                                       |
| L.                                | Massaro        |                       |                  | UPMC Medical Centre     | Pittsburgh                               | ESCAPE Trial Primary study coordinator                  | HERMES collaborators                                                                       |
| C.                                | Jackson-Graves |                       |                  | UPMC Medical Centre     | Pittsburgh                               | ESCAPE Trial Primary study coordinator                  | HERMES collaborators                                                                       |
| S.                                | Decesare       |                       |                  | UPMC Medical Centre     | Pittsburgh                               | ESCAPE Trial Primary study coordinator                  | HERMES collaborators                                                                       |
| P.                                | Porter         |                       |                  | UPMC Medical Centre     | Pittsburgh                               | ESCAPE Trial Primary study coordinator                  | HERMES collaborators                                                                       |
| K.                                | Armbruster     |                       |                  | UPMC Medical Centre     | Pittsburgh                               | ESCAPE Trial Primary study coordinator                  | HERMES collaborators                                                                       |

## Supplemental Online Content: Nonauthor Collaborators

\*First name, last name, and suffix (if applicable) are required and will appear in PubMed.

| *First Name and Middle Initial(s) | *Last Name  | *Suffix (eg, Jr, III) | Academic Degrees | Institution         | Location (city, state/province, country) | Role or Contribution, eg, chair, principal investigator | Group (if more than 1 Group listed in the byline) and/or Subgroup (eg, Steering Committee) |
|-----------------------------------|-------------|-----------------------|------------------|---------------------|------------------------------------------|---------------------------------------------------------|--------------------------------------------------------------------------------------------|
| A.                                | Adams       |                       |                  | UPMC Medical Centre | Pittsburgh                               | ESCAPE Trial Primary study coordinator                  | HERMES collaborators                                                                       |
| J.                                | Billigan    |                       |                  | UPMC Medical Centre | Pittsburgh                               | ESCAPE Trial Primary study coordinator                  | HERMES collaborators                                                                       |
| J.                                | Oakley      |                       |                  | UPMC Medical Centre | Pittsburgh                               | ESCAPE Trial Primary study coordinator                  | HERMES collaborators                                                                       |
| A.                                | Ducruet     |                       |                  | UPMC Medical Centre | Pittsburgh                               | ESCAPE Trial Site investigator                          | HERMES collaborators                                                                       |
| A.                                | Jadhav      |                       |                  | UPMC Medical Centre | Pittsburgh                               | ESCAPE Trial Site investigator                          | HERMES collaborators                                                                       |
| D.V.                              | Giurgiutiu  |                       |                  | UPMC Medical Centre | Pittsburgh                               | ESCAPE Trial Site investigator                          | HERMES collaborators                                                                       |
| A.                                | Aghaebrahim |                       |                  | UPMC Medical Centre | Pittsburgh                               | ESCAPE Trial Site investigator                          | HERMES collaborators                                                                       |
| V.                                | Reddy       |                       |                  | UPMC Medical Centre | Pittsburgh                               | ESCAPE Trial Site investigator                          | HERMES collaborators                                                                       |
| M.                                | Hammer      |                       |                  | UPMC Medical Centre | Pittsburgh                               | ESCAPE Trial Site investigator                          | HERMES collaborators                                                                       |
| M.                                | Starr       |                       |                  | UPMC Medical Centre | Pittsburgh                               | ESCAPE Trial Site investigator                          | HERMES collaborators                                                                       |
| V.                                | Totoraitis  |                       |                  | UPMC Medical Centre | Pittsburgh                               | ESCAPE Trial Site investigator                          | HERMES collaborators                                                                       |
| L.                                | Wechsler    |                       |                  | UPMC Medical Centre | Pittsburgh                               | ESCAPE Trial Site investigator                          | HERMES collaborators                                                                       |
| S.                                | Streib      |                       |                  | UPMC Medical Centre | Pittsburgh                               | ESCAPE Trial Site investigator                          | HERMES collaborators                                                                       |
| S.                                | Rangaraju   |                       |                  | UPMC Medical Centre | Pittsburgh                               | ESCAPE Trial Site investigator                          | HERMES collaborators                                                                       |
| D.                                | Campbell    |                       |                  | UPMC Medical Centre | Pittsburgh                               | ESCAPE Trial Site investigator                          | HERMES collaborators                                                                       |
| M.                                | Rocha       |                       |                  | UPMC Medical Centre | Pittsburgh                               | ESCAPE Trial Site investigator                          | HERMES collaborators                                                                       |

## Supplemental Online Content: Nonauthor Collaborators

\*First name, last name, and suffix (if applicable) are required and will appear in PubMed.

| *First Name and Middle Initial(s) | *Last Name | *Suffix (eg, Jr, III) | Academic Degrees | Institution                                      | Location (city, state/province, country) | Role or Contribution, eg, chair, principal investigator | Group (if more than 1 Group listed in the byline) and/or Subgroup (eg, Steering Committee) |
|-----------------------------------|------------|-----------------------|------------------|--------------------------------------------------|------------------------------------------|---------------------------------------------------------|--------------------------------------------------------------------------------------------|
| D.                                | Gulati     |                       |                  | UPMC Medical Centre                              | Pittsburgh                               | ESCAPE Trial Site investigator                          | HERMES collaborators                                                                       |
| F.L.                              | Silver     |                       |                  | University Health Network, University of Toronto | Toronto                                  | ESCAPE Trial Site PI                                    | HERMES collaborators                                                                       |
| T.                                | Krings     |                       |                  | University Health Network, University of Toronto | Toronto                                  | ESCAPE Trial Site PI                                    | HERMES collaborators                                                                       |
| L.                                | Kalman     |                       |                  | University Health Network, University of Toronto | Toronto                                  | ESCAPE Trial Primary study coordinator                  | HERMES collaborators                                                                       |
| A.                                | Cayley     |                       |                  | University Health Network, University of Toronto | Toronto                                  | ESCAPE Trial Primary study coordinator                  | HERMES collaborators                                                                       |
| J.                                | Williams   |                       |                  | University Health Network, University of Toronto | Toronto                                  | ESCAPE Trial Primary study coordinator                  | HERMES collaborators                                                                       |
| T.                                | Stewart    |                       |                  | University Health Network, University of Toronto | Toronto                                  | ESCAPE Trial Primary study coordinator                  | HERMES collaborators                                                                       |
| R.                                | Wiegner    |                       |                  | University Health Network, University of Toronto | Toronto                                  | ESCAPE Trial Primary study coordinator                  | HERMES collaborators                                                                       |
| L.K.                              | Casabon    |                       |                  | University Health Network, University of Toronto | Toronto                                  | ESCAPE Trial Site investigator                          | HERMES collaborators                                                                       |
| C.                                | Jaigobin   |                       |                  | University Health Network, University of Toronto | Toronto                                  | ESCAPE Trial Site investigator                          | HERMES collaborators                                                                       |
| J.M.                              | del Campo  |                       |                  | University Health Network, University of Toronto | Toronto                                  | ESCAPE Trial Site investigator                          | HERMES collaborators                                                                       |
| J.D.                              | Schaafsma  |                       |                  | University Health Network, University of Toronto | Toronto                                  | ESCAPE Trial Site investigator                          | HERMES collaborators                                                                       |
| R.A.                              | Willinsky  |                       |                  | University Health Network, University of Toronto | Toronto                                  | ESCAPE Trial Site investigator                          | HERMES collaborators                                                                       |
| R.                                | Agid       |                       |                  | University Health Network, University of Toronto | Toronto                                  | ESCAPE Trial Site investigator                          | HERMES collaborators                                                                       |
| R.                                | Farb       |                       |                  | University Health Network, University of Toronto | Toronto                                  | ESCAPE Trial Site investigator                          | HERMES collaborators                                                                       |
| K.                                | ter Brugge |                       |                  | University Health Network, University of Toronto | Toronto                                  | ESCAPE Trial Site investigator                          | HERMES collaborators                                                                       |

## Supplemental Online Content: Nonauthor Collaborators

\*First name, last name, and suffix (if applicable) are required and will appear in PubMed.

| *First Name and Middle Initial(s) | *Last Name   | *Suffix (eg, Jr, III) | Academic Degrees | Institution                                            | Location (city, state/province, country) | Role or Contribution, eg, chair, principal investigator | Group (if more than 1 Group listed in the byline) and/or Subgroup (eg, Steering Committee) |
|-----------------------------------|--------------|-----------------------|------------------|--------------------------------------------------------|------------------------------------------|---------------------------------------------------------|--------------------------------------------------------------------------------------------|
| B.L.                              | Sapkoda      |                       |                  | Erlanger Hospital                                      | Chattanooga                              | ESCAPE Trial Site PI                                    | HERMES collaborators                                                                       |
| B.W.                              | Baxter       |                       |                  | Erlanger Hospital                                      | Chattanooga                              | ESCAPE Trial Site PI                                    | HERMES collaborators                                                                       |
| K.                                | Barton       |                       |                  | Erlanger Hospital                                      | Chattanooga                              | ESCAPE Trial Primary study coordinator                  | HERMES collaborators                                                                       |
| A.                                | Knox         |                       |                  | Erlanger Hospital                                      | Chattanooga                              | ESCAPE Trial Primary study coordinator                  | HERMES collaborators                                                                       |
| A.                                | Porter       |                       |                  | Erlanger Hospital                                      | Chattanooga                              | ESCAPE Trial Primary study coordinator                  | HERMES collaborators                                                                       |
| A.                                | Sirelkhatim  |                       |                  | Erlanger Hospital                                      | Chattanooga                              | ESCAPE Trial Site investigator                          | HERMES collaborators                                                                       |
| T.                                | Devlin       |                       |                  | Erlanger Hospital                                      | Chattanooga                              | ESCAPE Trial Site investigator                          | HERMES collaborators                                                                       |
| C.                                | Dellinger    |                       |                  | Erlanger Hospital                                      | Chattanooga                              | ESCAPE Trial Site investigator                          | HERMES collaborators                                                                       |
| N.                                | Pitiyanuvath |                       |                  | Erlanger Hospital                                      | Chattanooga                              | ESCAPE Trial Site investigator                          | HERMES collaborators                                                                       |
| J.                                | Patterson    |                       |                  | Erlanger Hospital                                      | Chattanooga                              | ESCAPE Trial Site investigator                          | HERMES collaborators                                                                       |
| J.                                | Nichols      |                       |                  | Erlanger Hospital                                      | Chattanooga                              | ESCAPE Trial Site investigator                          | HERMES collaborators                                                                       |
| S.                                | Quarfordt    |                       |                  | Erlanger Hospital                                      | Chattanooga                              | ESCAPE Trial Site investigator                          | HERMES collaborators                                                                       |
| J.                                | Calvert      |                       |                  | Erlanger Hospital                                      | Chattanooga                              | ESCAPE Trial Site investigator                          | HERMES collaborators                                                                       |
| H.                                | Hawk         |                       |                  | Erlanger Hospital                                      | Chattanooga                              | ESCAPE Trial Site investigator                          | HERMES collaborators                                                                       |
| C.                                | Fanale       |                       |                  | Swedish Medical Center-Colorado Neurological Institute | Denver                                   | ESCAPE Trial Site PI                                    | HERMES collaborators                                                                       |
| D.F.                              | Frei         |                       |                  | Swedish Medical Center-Colorado Neurological Institute | Denver                                   | ESCAPE Trial Site PI                                    | HERMES collaborators                                                                       |
| A.                                | Bitner       |                       |                  | Swedish Medical Center-Colorado Neurological Institute | Denver                                   | ESCAPE Trial Primary study coordinator                  | HERMES collaborators                                                                       |

## Supplemental Online Content: Nonauthor Collaborators

\*First name, last name, and suffix (if applicable) are required and will appear in PubMed.

| *First Name and Middle Initial(s) | *Last Name | *Suffix (eg, Jr, III) | Academic Degrees | Institution                                            | Location (city, state/province, country) | Role or Contribution, eg, chair, principal investigator | Group (if more than 1 Group listed in the byline) and/or Subgroup (eg, Steering Committee) |
|-----------------------------------|------------|-----------------------|------------------|--------------------------------------------------------|------------------------------------------|---------------------------------------------------------|--------------------------------------------------------------------------------------------|
| A.                                | Novak      |                       |                  | Swedish Medical Center-Colorado Neurological Institute | Denver                                   | ESCAPE Trial Primary study coordinator                  | HERMES collaborators                                                                       |
| D.                                | Huddle     |                       |                  | Swedish Medical Center-Colorado Neurological Institute | Denver                                   | ESCAPE Trial Site investigator                          | HERMES collaborators                                                                       |
| R.                                | Bellon     |                       |                  | Swedish Medical Center-Colorado Neurological Institute | Denver                                   | ESCAPE Trial Site investigator                          | HERMES collaborators                                                                       |
| D.                                | Loy        |                       |                  | Swedish Medical Center-Colorado Neurological Institute | Denver                                   | ESCAPE Trial Site investigator                          | HERMES collaborators                                                                       |
| J.                                | Wagner     |                       |                  | Swedish Medical Center-Colorado Neurological Institute | Denver                                   | ESCAPE Trial Site investigator                          | HERMES collaborators                                                                       |
| I.                                | Chang      |                       |                  | Swedish Medical Center-Colorado Neurological Institute | Denver                                   | ESCAPE Trial Site investigator                          | HERMES collaborators                                                                       |
| E.                                | Lampe      |                       |                  | Swedish Medical Center-Colorado Neurological Institute | Denver                                   | ESCAPE Trial Site investigator                          | HERMES collaborators                                                                       |
| B.                                | Spencer    |                       |                  | Swedish Medical Center-Colorado Neurological Institute | Denver                                   | ESCAPE Trial Site investigator                          | HERMES collaborators                                                                       |
| R.                                | Pratt      |                       |                  | Swedish Medical Center-Colorado Neurological Institute | Denver                                   | ESCAPE Trial Site investigator                          | HERMES collaborators                                                                       |
| R.                                | Bartt      |                       |                  | Swedish Medical Center-Colorado Neurological Institute | Denver                                   | ESCAPE Trial Site investigator                          | HERMES collaborators                                                                       |
| S.                                | Shine      |                       |                  | Swedish Medical Center-Colorado Neurological Institute | Denver                                   | ESCAPE Trial Site investigator                          | HERMES collaborators                                                                       |
| G.                                | Dooley     |                       |                  | Swedish Medical Center-Colorado Neurological Institute | Denver                                   | ESCAPE Trial Site investigator                          | HERMES collaborators                                                                       |
| T.                                | Nguyen     |                       |                  | Swedish Medical Center-Colorado Neurological Institute | Denver                                   | ESCAPE Trial Site investigator                          | HERMES collaborators                                                                       |
| M.                                | Whaley     |                       |                  | Swedish Medical Center-Colorado Neurological Institute | Denver                                   | ESCAPE Trial Site investigator                          | HERMES collaborators                                                                       |
| K.                                | McCarthy   |                       |                  | Swedish Medical Center-Colorado Neurological Institute | Denver                                   | ESCAPE Trial Site investigator                          | HERMES collaborators                                                                       |
| J.                                | Teitelbaum |                       |                  | Montreal Neurological Institute, McGill University     | Montreal, Canada                         | ESCAPE Trial Site PI                                    | HERMES collaborators                                                                       |

## Supplemental Online Content: Nonauthor Collaborators

\*First name, last name, and suffix (if applicable) are required and will appear in PubMed.

| *First Name and Middle Initial(s) | *Last Name   | *Suffix (eg, Jr, III) | Academic Degrees | Institution                                        | Location (city, state/province, country) | Role or Contribution, eg, chair, principal investigator | Group (if more than 1 Group listed in the byline) and/or Subgroup (eg, Steering Committee) |
|-----------------------------------|--------------|-----------------------|------------------|----------------------------------------------------|------------------------------------------|---------------------------------------------------------|--------------------------------------------------------------------------------------------|
| D.                                | Tampieri     |                       |                  | Montreal Neurological Institute, McGill University | Montreal, Canada                         | ESCAPE Trial Site PI                                    | HERMES collaborators                                                                       |
| W.                                | Poon         |                       |                  | Montreal Neurological Institute, McGill University | Montreal, Canada                         | ESCAPE Trial Primary study coordinator                  | HERMES collaborators                                                                       |
| N.                                | Campbell     |                       |                  | Montreal Neurological Institute, McGill University | Montreal, Canada                         | ESCAPE Trial Primary study coordinator                  | HERMES collaborators                                                                       |
| M.                                | Cortes       |                       |                  | Montreal Neurological Institute, McGill University | Montreal, Canada                         | ESCAPE Trial Site investigator                          | HERMES collaborators                                                                       |
| D.                                | Dowlatsahi   |                       |                  | Ottawa Hospital, University of Ottawa              | Ottawa                                   | ESCAPE Trial Site PI                                    | HERMES collaborators                                                                       |
| C.                                | Lum          |                       |                  | Ottawa Hospital, University of Ottawa              | Ottawa                                   | ESCAPE Trial Site PI                                    | HERMES collaborators                                                                       |
| R.                                | Shamloul     |                       |                  | Ottawa Hospital, University of Ottawa              | Ottawa                                   | ESCAPE Trial Primary study coordinator                  | HERMES collaborators                                                                       |
| S.                                | Robert       |                       |                  | Ottawa Hospital, University of Ottawa              | Ottawa                                   | ESCAPE Trial Primary study coordinator                  | HERMES collaborators                                                                       |
| G.                                | Stotts       |                       |                  | Ottawa Hospital, University of Ottawa              | Ottawa                                   | ESCAPE Trial Site investigator                          | HERMES collaborators                                                                       |
| M.                                | Shamy        |                       |                  | Ottawa Hospital, University of Ottawa              | Ottawa                                   | ESCAPE Trial Site investigator                          | HERMES collaborators                                                                       |
| N.                                | Steffenhagen |                       |                  | Ottawa Hospital, University of Ottawa              | Ottawa                                   | ESCAPE Trial Site investigator                          | HERMES collaborators                                                                       |
| D.                                | Blacquiere   |                       |                  | Ottawa Hospital, University of Ottawa              | Ottawa                                   | ESCAPE Trial Site investigator                          | HERMES collaborators                                                                       |
| M.                                | Hogan        |                       |                  | Ottawa Hospital, University of Ottawa              | Ottawa                                   | ESCAPE Trial Site investigator                          | HERMES collaborators                                                                       |
| M.                                | AlHazzaa     |                       |                  | Ottawa Hospital, University of Ottawa              | Ottawa                                   | ESCAPE Trial Site investigator                          | HERMES collaborators                                                                       |
| G.                                | Basir        |                       |                  | Ottawa Hospital, University of Ottawa              | Ottawa                                   | ESCAPE Trial Site investigator                          | HERMES collaborators                                                                       |
| H.                                | Lesiuk       |                       |                  | Ottawa Hospital, University of Ottawa              | Ottawa                                   | ESCAPE Trial Site investigator                          | HERMES collaborators                                                                       |



## Supplemental Online Content: Nonauthor Collaborators

\*First name, last name, and suffix (if applicable) are required and will appear in PubMed.

| *First Name and Middle Initial(s) | *Last Name    | *Suffix (eg, Jr, III) | Academic Degrees | Institution                                      | Location (city, state/province, country) | Role or Contribution, eg, chair, principal investigator | Group (if more than 1 Group listed in the byline) and/or Subgroup (eg, Steering Committee) |
|-----------------------------------|---------------|-----------------------|------------------|--------------------------------------------------|------------------------------------------|---------------------------------------------------------|--------------------------------------------------------------------------------------------|
| D.                                | Iancu         |                       |                  | Ottawa Hospital, University of Ottawa            | Ottawa                                   | ESCAPE Trial Site investigator                          | HERMES collaborators                                                                       |
| M.                                | Santos        |                       |                  | Ottawa Hospital, University of Ottawa            | Ottawa                                   | ESCAPE Trial Site investigator                          | HERMES collaborators                                                                       |
| H.                                | Choe          |                       |                  | Abington Memorial Hospital                       | Philadelphia                             | ESCAPE Trial Site PI                                    | HERMES collaborators                                                                       |
| D.C.                              | Weisman       |                       |                  | Abington Memorial Hospital                       | Philadelphia                             | ESCAPE Trial Site PI                                    | HERMES collaborators                                                                       |
| K.                                | Jonczak       |                       |                  | Abington Memorial Hospital                       | Philadelphia                             | ESCAPE Trial Primary study coordinator                  | HERMES collaborators                                                                       |
| A.                                | Blue-Schaller |                       |                  | Abington Memorial Hospital                       | Philadelphia                             | ESCAPE Trial Primary study coordinator                  | HERMES collaborators                                                                       |
| Q.                                | Shah          |                       |                  | Abington Memorial Hospital                       | Philadelphia                             | ESCAPE Trial Site investigator                          | HERMES collaborators                                                                       |
| L.                                | MacKenzie     |                       |                  | Abington Memorial Hospital                       | Philadelphia                             | ESCAPE Trial Site investigator                          | HERMES collaborators                                                                       |
| B.                                | Klein         |                       |                  | Abington Memorial Hospital                       | Philadelphia                             | ESCAPE Trial Site investigator                          | HERMES collaborators                                                                       |
| K.                                | Kulandaivel   |                       |                  | Abington Memorial Hospital                       | Philadelphia                             | ESCAPE Trial Site investigator                          | HERMES collaborators                                                                       |
| O.                                | Kozak         |                       |                  | Abington Memorial Hospital                       | Philadelphia                             | ESCAPE Trial Site investigator                          | HERMES collaborators                                                                       |
| D.J.                              | Gzesh         |                       |                  | Abington Memorial Hospital                       | Philadelphia                             | ESCAPE Trial Site investigator                          | HERMES collaborators                                                                       |
| L.J.                              | Harris        |                       |                  | Abington Memorial Hospital                       | Philadelphia                             | ESCAPE Trial Site investigator                          | HERMES collaborators                                                                       |
| J.S.                              | Khoury        |                       |                  | Abington Memorial Hospital                       | Philadelphia                             | ESCAPE Trial Site investigator                          | HERMES collaborators                                                                       |
| J.                                | Mandzia       |                       |                  | London Health Science Centre, Western University | London                                   | ESCAPE Trial Site PI                                    | HERMES collaborators                                                                       |
| D.                                | Pelz          |                       |                  | London Health Science Centre, Western University | London                                   | ESCAPE Trial Site PI                                    | HERMES collaborators                                                                       |
| S.                                | Crann         |                       |                  | London Health Science Centre, Western University | London                                   | ESCAPE Trial Primary study coordinator                  | HERMES collaborators                                                                       |

## Supplemental Online Content: Nonauthor Collaborators

\*First name, last name, and suffix (if applicable) are required and will appear in PubMed.

| *First Name and Middle Initial(s) | *Last Name     | *Suffix (eg, Jr, III) | Academic Degrees | Institution                                             | Location (city, state/province, country) | Role or Contribution, eg, chair, principal investigator | Group (if more than 1 Group listed in the byline) and/or Subgroup (eg, Steering Committee) |
|-----------------------------------|----------------|-----------------------|------------------|---------------------------------------------------------|------------------------------------------|---------------------------------------------------------|--------------------------------------------------------------------------------------------|
| L.                                | Fleming        |                       |                  | London Health Science Centre, Western University        | London                                   | ESCAPE Trial Primary study coordinator                  | HERMES collaborators                                                                       |
| K.                                | Hesser         |                       |                  | London Health Science Centre, Western University        | London                                   | ESCAPE Trial Primary study coordinator                  | HERMES collaborators                                                                       |
| B.                                | Beauchamp      |                       |                  | London Health Science Centre, Western University        | London                                   | ESCAPE Trial Primary study coordinator                  | HERMES collaborators                                                                       |
| B.                                | Amato-Marzilli |                       |                  | London Health Science Centre, Western University        | London                                   | ESCAPE Trial Primary study coordinator                  | HERMES collaborators                                                                       |
| M.                                | Boulton        |                       |                  | London Health Science Centre, Western University        | London                                   | ESCAPE Trial Site investigator                          | HERMES collaborators                                                                       |
| P.                                | Lopez-Ojeda    |                       |                  | London Health Science Centre, Western University        | London                                   | ESCAPE Trial Site investigator                          | HERMES collaborators                                                                       |
| M.                                | Sharma         |                       |                  | London Health Science Centre, Western University        | London                                   | ESCAPE Trial Site investigator                          | HERMES collaborators                                                                       |
| S.                                | Lownie         |                       |                  | London Health Science Centre, Western University        | London                                   | ESCAPE Trial Site investigator                          | HERMES collaborators                                                                       |
| R.                                | Chan           |                       |                  | London Health Science Centre, Western University        | London                                   | ESCAPE Trial Site investigator                          | HERMES collaborators                                                                       |
| R.                                | Swartz         |                       |                  | University of Toronto-Sunnybrook Health Sciences Centre | Toronto                                  | ESCAPE Trial Site PI                                    | HERMES collaborators                                                                       |
| P.                                | Howard         |                       |                  | University of Toronto-Sunnybrook Health Sciences Centre | Toronto                                  | ESCAPE Trial Site PI                                    | HERMES collaborators                                                                       |
| D.                                | Golob          |                       |                  | University of Toronto-Sunnybrook Health Sciences Centre | Toronto                                  | ESCAPE Trial Primary study coordinator                  | HERMES collaborators                                                                       |
| D.                                | Gladstone      |                       |                  | University of Toronto-Sunnybrook Health Sciences Centre | Toronto                                  | ESCAPE Trial Site investigator                          | HERMES collaborators                                                                       |

## Supplemental Online Content: Nonauthor Collaborators

\*First name, last name, and suffix (if applicable) are required and will appear in PubMed.

| *First Name and Middle Initial(s) | *Last Name | *Suffix (eg, Jr, III) | Academic Degrees | Institution                                                    | Location (city, state/province, country) | Role or Contribution, eg, chair, principal investigator | Group (if more than 1 Group listed in the byline) and/or Subgroup (eg, Steering Committee) |
|-----------------------------------|------------|-----------------------|------------------|----------------------------------------------------------------|------------------------------------------|---------------------------------------------------------|--------------------------------------------------------------------------------------------|
| K.                                | Boyle      |                       |                  | University of Toronto-Sunnybrook Health Sciences Centre        | Toronto                                  | ESCAPE Trial Site investigator                          | HERMES collaborators                                                                       |
| M.                                | Boulos     |                       |                  | University of Toronto-Sunnybrook Health Sciences Centre        | Toronto                                  | ESCAPE Trial Site investigator                          | HERMES collaborators                                                                       |
| J.                                | Hopyan     |                       |                  | University of Toronto-Sunnybrook Health Sciences Centre        | Toronto                                  | ESCAPE Trial Site investigator                          | HERMES collaborators                                                                       |
| V.                                | Yang       |                       |                  | University of Toronto-Sunnybrook Health Sciences Centre        | Toronto                                  | ESCAPE Trial Site investigator                          | HERMES collaborators                                                                       |
| L.                                | Da Costa   |                       |                  | University of Toronto-Sunnybrook Health Sciences Centre        | Toronto                                  | ESCAPE Trial Site investigator                          | HERMES collaborators                                                                       |
| C.A.                              | Holmstedt  |                       |                  | Medical University of South Carolina                           | Charleston                               | ESCAPE Trial Site PI                                    | HERMES collaborators                                                                       |
| A.S.                              | Turk       |                       |                  | Medical University of South Carolina                           | Charleston                               | ESCAPE Trial Site PI                                    | HERMES collaborators                                                                       |
| R.                                | Navarro    |                       |                  | Medical University of South Carolina                           | Charleston                               | ESCAPE Trial Primary study coordinator                  | HERMES collaborators                                                                       |
| E.                                | Jauch      |                       |                  | Medical University of South Carolina                           | Charleston                               | ESCAPE Trial Site investigator                          | HERMES collaborators                                                                       |
| S.                                | Ozark      |                       |                  | Medical University of South Carolina                           | Charleston                               | ESCAPE Trial Site investigator                          | HERMES collaborators                                                                       |
| R.                                | Turner     |                       |                  | Medical University of South Carolina                           | Charleston                               | ESCAPE Trial Site investigator                          | HERMES collaborators                                                                       |
| S.                                | Phillips   |                       |                  | Queen Elizabeth II Health Science Centre, Dalhousie University | Halifax                                  | ESCAPE Trial Site PI                                    | HERMES collaborators                                                                       |

## Supplemental Online Content: Nonauthor Collaborators

\*First name, last name, and suffix (if applicable) are required and will appear in PubMed.

| *First Name and Middle Initial(s) | *Last Name  | *Suffix (eg, Jr, III) | Academic Degrees | Institution                                                    | Location (city, state/province, country) | Role or Contribution, eg, chair, principal investigator | Group (if more than 1 Group listed in the byline) and/or Subgroup (eg, Steering Committee) |
|-----------------------------------|-------------|-----------------------|------------------|----------------------------------------------------------------|------------------------------------------|---------------------------------------------------------|--------------------------------------------------------------------------------------------|
| J.                                | Shankar     |                       |                  | Queen Elizabeth II Health Science Centre, Dalhousie University | Halifax                                  | ESCAPE Trial Site PI                                    | HERMES collaborators                                                                       |
| J.                                | Jarrett     |                       |                  | Queen Elizabeth II Health Science Centre, Dalhousie University | Halifax                                  | ESCAPE Trial Primary study coordinator                  | HERMES collaborators                                                                       |
| G.                                | Gubitz      |                       |                  | Queen Elizabeth II Health Science Centre, Dalhousie University | Halifax                                  | ESCAPE Trial Site investigator                          | HERMES collaborators                                                                       |
| W.                                | Maloney     |                       |                  | Queen Elizabeth II Health Science Centre, Dalhousie University | Halifax                                  | ESCAPE Trial Site investigator                          | HERMES collaborators                                                                       |
| R.                                | Vandorpe    |                       |                  | Queen Elizabeth II Health Science Centre, Dalhousie University | Halifax                                  | ESCAPE Trial Site investigator                          | HERMES collaborators                                                                       |
| M.                                | Schmidt     |                       |                  | Queen Elizabeth II Health Science Centre, Dalhousie University | Halifax                                  | ESCAPE Trial Site investigator                          | HERMES collaborators                                                                       |
| J.                                | Heidenreich |                       |                  | Queen Elizabeth II Health Science Centre, Dalhousie University | Halifax                                  | ESCAPE Trial Site investigator                          | HERMES collaborators                                                                       |
| G.                                | Hunter      |                       |                  | Royal University Hospital, University of Saskatchewan          | Saskatoon                                | ESCAPE Trial Site PI                                    | HERMES collaborators                                                                       |
| M.                                | Kelly       |                       |                  | Royal University Hospital, University of Saskatchewan          | Saskatoon                                | ESCAPE Trial Site PI                                    | HERMES collaborators                                                                       |
| R.                                | Whelan      |                       |                  | Royal University Hospital, University of Saskatchewan          | Saskatoon                                | ESCAPE Trial Primary study coordinator                  | HERMES collaborators                                                                       |
| L.                                | Peeling     |                       |                  | Royal University Hospital, University of Saskatchewan          | Saskatoon                                | ESCAPE Trial Site investigator                          | HERMES collaborators                                                                       |
| P.A.                              | Burns       |                       |                  | Royal Victoria Hospital                                        | Belfast, UK                              | ESCAPE Trial Site PI                                    | HERMES collaborators                                                                       |
| A.                                | Hunter      |                       |                  | Royal Victoria Hospital                                        | Belfast, UK                              | ESCAPE Trial Primary study coordinator                  | HERMES collaborators                                                                       |

## Supplemental Online Content: Nonauthor Collaborators

\*First name, last name, and suffix (if applicable) are required and will appear in PubMed.

| *First Name and Middle Initial(s) | *Last Name | *Suffix (eg, Jr, III) | Academic Degrees | Institution             | Location (city, state/province, country) | Role or Contribution, eg, chair, principal investigator | Group (if more than 1 Group listed in the byline) and/or Subgroup (eg, Steering Committee) |
|-----------------------------------|------------|-----------------------|------------------|-------------------------|------------------------------------------|---------------------------------------------------------|--------------------------------------------------------------------------------------------|
| I.                                | Wiggam     |                       |                  | Royal Victoria Hospital | Belfast, UK                              | ESCAPE Trial Site investigator                          | HERMES collaborators                                                                       |
| E.                                | Kerr       |                       |                  | Royal Victoria Hospital | Belfast, UK                              | ESCAPE Trial Site investigator                          | HERMES collaborators                                                                       |
| M.                                | Watt       |                       |                  | Royal Victoria Hospital | Belfast, UK                              | ESCAPE Trial Site investigator                          | HERMES collaborators                                                                       |
| A.                                | Fulton     |                       |                  | Royal Victoria Hospital | Belfast, UK                              | ESCAPE Trial Site investigator                          | HERMES collaborators                                                                       |
| P.                                | Gordon     |                       |                  | Royal Victoria Hospital | Belfast, UK                              | ESCAPE Trial Site investigator                          | HERMES collaborators                                                                       |
| I,                                | Rennie     |                       |                  | Royal Victoria Hospital | Belfast, UK                              | ESCAPE Trial Site investigator                          | HERMES collaborators                                                                       |
| P.                                | Flynn      |                       |                  | Royal Victoria Hospital | Belfast, UK                              | ESCAPE Trial Site investigator                          | HERMES collaborators                                                                       |
| G.                                | Smyth      |                       |                  | Royal Victoria Hospital | Belfast, UK                              | ESCAPE Trial Site investigator                          | HERMES collaborators                                                                       |
| S.                                | O'Leary    |                       |                  | Royal Victoria Hospital | Belfast, UK                              | ESCAPE Trial Site investigator                          | HERMES collaborators                                                                       |
| N.                                | Gentile    |                       |                  | Temple University       | Philadelphia                             | ESCAPE Trial Site PI                                    | HERMES collaborators                                                                       |
| G.                                | Linares    |                       |                  | Temple University       | Philadelphia                             | ESCAPE Trial Site PI                                    | HERMES collaborators                                                                       |
| P.                                | McNelis    |                       |                  | Temple University       | Philadelphia                             | ESCAPE Trial Primary study coordinator                  | HERMES collaborators                                                                       |
| K.                                | Erkmen     |                       |                  | Temple University       | Philadelphia                             | ESCAPE Trial Site investigator                          | HERMES collaborators                                                                       |
| P.                                | Katz       |                       |                  | Temple University       | Philadelphia                             | ESCAPE Trial Site investigator                          | HERMES collaborators                                                                       |
| A.                                | Azizi      |                       |                  | Temple University       | Philadelphia                             | ESCAPE Trial Site investigator                          | HERMES collaborators                                                                       |
| M.                                | Weaver     |                       |                  | Temple University       | Philadelphia                             | ESCAPE Trial Site investigator                          | HERMES collaborators                                                                       |
| C.                                | Jungreis   |                       |                  | Temple University       | Philadelphia                             | ESCAPE Trial Site investigator                          | HERMES collaborators                                                                       |

## Supplemental Online Content: Nonauthor Collaborators

\*First name, last name, and suffix (if applicable) are required and will appear in PubMed.

| *First Name and Middle Initial(s) | *Last Name | *Suffix (eg, Jr, III) | Academic Degrees | Institution                                   | Location (city, state/province, country) | Role or Contribution, eg, chair, principal investigator | Group (if more than 1 Group listed in the byline) and/or Subgroup (eg, Steering Committee) |
|-----------------------------------|------------|-----------------------|------------------|-----------------------------------------------|------------------------------------------|---------------------------------------------------------|--------------------------------------------------------------------------------------------|
| S.                                | Faro       |                       |                  | Temple University                             | Philadelphia                             | ESCAPE Trial Site investigator                          | HERMES collaborators                                                                       |
| P.                                | Shah       |                       |                  | Temple University                             | Philadelphia                             | ESCAPE Trial Site investigator                          | HERMES collaborators                                                                       |
| H.                                | Reimer     |                       |                  | Temple University                             | Philadelphia                             | ESCAPE Trial Site investigator                          | HERMES collaborators                                                                       |
| V.                                | Kalugdan   |                       |                  | Temple University                             | Philadelphia                             | ESCAPE Trial Site investigator                          | HERMES collaborators                                                                       |
| G.                                | Saposnik   |                       |                  | St. Michael's Hospital, University of Toronto | Toronto                                  | ESCAPE Trial Site PI                                    | HERMES collaborators                                                                       |
| A.                                | Bharatha   |                       |                  | St. Michael's Hospital, University of Toronto | Toronto                                  | ESCAPE Trial Site PI                                    | HERMES collaborators                                                                       |
| Y.                                | Li         |                       |                  | St. Michael's Hospital, University of Toronto | Toronto                                  | ESCAPE Trial Primary study coordinator                  | HERMES collaborators                                                                       |
| P.                                | Kostyrko   |                       |                  | St. Michael's Hospital, University of Toronto | Toronto                                  | ESCAPE Trial Primary study coordinator                  | HERMES collaborators                                                                       |
| M.                                | Santos     |                       |                  | St. Michael's Hospital, University of Toronto | Toronto                                  | ESCAPE Trial Primary study coordinator                  | HERMES collaborators                                                                       |
| T.                                | Marotta    |                       |                  | St. Michael's Hospital, University of Toronto | Toronto                                  | ESCAPE Trial Site investigator                          | HERMES collaborators                                                                       |
| W.                                | Montanera  |                       |                  | St. Michael's Hospital, University of Toronto | Toronto                                  | ESCAPE Trial Site investigator                          | HERMES collaborators                                                                       |
| D.                                | Sarma      |                       |                  | St. Michael's Hospital, University of Toronto | Toronto                                  | ESCAPE Trial Site investigator                          | HERMES collaborators                                                                       |
| D.                                | Selchen    |                       |                  | St. Michael's Hospital, University of Toronto | Toronto                                  | ESCAPE Trial Site investigator                          | HERMES collaborators                                                                       |
| J.                                | Spears     |                       |                  | St. Michael's Hospital, University of Toronto | Toronto                                  | ESCAPE Trial Site investigator                          | HERMES collaborators                                                                       |
| J.H.                              | Heo        |                       |                  | Yonsei University Severance Hospital          | Seoul                                    | ESCAPE Trial Site PI                                    | HERMES collaborators                                                                       |
| K.                                | Jeong      |                       |                  | Yonsei University Severance Hospital          | Seoul                                    | ESCAPE Trial Primary study coordinator                  | HERMES collaborators                                                                       |

## Supplemental Online Content: Nonauthor Collaborators

\*First name, last name, and suffix (if applicable) are required and will appear in PubMed.

| *First Name and Middle Initial(s) | *Last Name | *Suffix (eg, Jr, III) | Academic Degrees | Institution                                 | Location (city, state/province, country) | Role or Contribution, eg, chair, principal investigator | Group (if more than 1 Group listed in the byline) and/or Subgroup (eg, Steering Committee) |
|-----------------------------------|------------|-----------------------|------------------|---------------------------------------------|------------------------------------------|---------------------------------------------------------|--------------------------------------------------------------------------------------------|
| D.J.                              | Kim        |                       |                  | Yonsei University Severance Hospital        | Seoul                                    | ESCAPE Trial Site investigator                          | HERMES collaborators                                                                       |
| B.M.                              | Kim        |                       |                  | Yonsei University Severance Hospital        | Seoul                                    | ESCAPE Trial Site investigator                          | HERMES collaborators                                                                       |
| Y.D.                              | Kim        |                       |                  | Yonsei University Severance Hospital        | Seoul                                    | ESCAPE Trial Site investigator                          | HERMES collaborators                                                                       |
| D.                                | Song       |                       |                  | Yonsei University Severance Hospital        | Seoul                                    | ESCAPE Trial Site investigator                          | HERMES collaborators                                                                       |
| K-J                               | Lee        |                       |                  | Yonsei University Severance Hospital        | Seoul                                    | ESCAPE Trial Site investigator                          | HERMES collaborators                                                                       |
| J.                                | Yoo        |                       |                  | Yonsei University Severance Hospital        | Seoul                                    | ESCAPE Trial Site investigator                          | HERMES collaborators                                                                       |
| O.Y.                              | Bang       |                       |                  | Samsung Medical Center                      | Seoul                                    | ESCAPE Trial Site PI                                    | HERMES collaborators                                                                       |
| S.                                | Rho        |                       |                  | Samsung Medical Center                      | Seoul                                    | ESCAPE Trial Primary study coordinator                  | HERMES collaborators                                                                       |
| J.                                | Lee        |                       |                  | Samsung Medical Center                      | Seoul                                    | ESCAPE Trial Primary study coordinator                  | HERMES collaborators                                                                       |
| P.                                | Jeon       |                       |                  | Samsung Medical Center                      | Seoul                                    | ESCAPE Trial Site investigator                          | HERMES collaborators                                                                       |
| K.H.                              | Kim        |                       |                  | Samsung Medical Center                      | Seoul                                    | ESCAPE Trial Site investigator                          | HERMES collaborators                                                                       |
| J.                                | Cha        |                       |                  | Samsung Medical Center                      | Seoul                                    | ESCAPE Trial Site investigator                          | HERMES collaborators                                                                       |
| S.J.                              | Kim        |                       |                  | Samsung Medical Center                      | Seoul                                    | ESCAPE Trial Site investigator                          | HERMES collaborators                                                                       |
| S.                                | Ryoo       |                       |                  | Samsung Medical Center                      | Seoul                                    | ESCAPE Trial Site investigator                          | HERMES collaborators                                                                       |
| M.J.                              | Lee        |                       |                  | Samsung Medical Center                      | Seoul                                    | ESCAPE Trial Site investigator                          | HERMES collaborators                                                                       |
| S-I                               | Sohn       |                       |                  | Keimyung University, Dongsan Medical Center | Daegu                                    | ESCAPE Trial Site PI                                    | HERMES collaborators                                                                       |

## Supplemental Online Content: Nonauthor Collaborators

\*First name, last name, and suffix (if applicable) are required and will appear in PubMed.

| *First Name and Middle Initial(s) | *Last Name | *Suffix (eg, Jr, III) | Academic Degrees | Institution                                 | Location (city, state/province, country) | Role or Contribution, eg, chair, principal investigator                                  | Group (if more than 1 Group listed in the byline) and/or Subgroup (eg, Steering Committee) |
|-----------------------------------|------------|-----------------------|------------------|---------------------------------------------|------------------------------------------|------------------------------------------------------------------------------------------|--------------------------------------------------------------------------------------------|
| C-H                               | Kim        |                       |                  | Keimyung University, Dongsan Medical Center | Daegu                                    | ESCAPE Trial Site PI                                                                     | HERMES collaborators                                                                       |
| H-G                               | Ryu        |                       |                  | Keimyung University, Dongsan Medical Center | Daegu                                    | ESCAPE Trial Primary study coordinator                                                   | HERMES collaborators                                                                       |
| J-H                               | Hong       |                       |                  | Keimyung University, Dongsan Medical Center | Daegu                                    | ESCAPE Trial Site investigator                                                           | HERMES collaborators                                                                       |
| H-W                               | Chang      |                       |                  | Keimyung University, Dongsan Medical Center | Daegu                                    | ESCAPE Trial Site investigator                                                           | HERMES collaborators                                                                       |
| C-Y                               | Lee        |                       |                  | Keimyung University, Dongsan Medical Center | Daegu                                    | ESCAPE Trial Site investigator                                                           | HERMES collaborators                                                                       |
|                                   |            |                       |                  |                                             |                                          |                                                                                          | HERMES collaborators                                                                       |
| S.M.                              | Davis      |                       |                  | Royal Melbourne Hospital                    | Melbourne, Australia                     | EXTEND-IA Executive committee (co-chair)                                                 | HERMES collaborators                                                                       |
| G.A.                              | Donnan     |                       |                  |                                             |                                          | EXTEND-IA Executive committee (co-chair)                                                 | HERMES collaborators                                                                       |
| B.C.V.                            | Campbell   |                       |                  | Royal Melbourne Hospital                    | Melbourne, Australia                     | EXTEND-IA Executive committee, co-principal investigator and medical co-ordinator        | HERMES collaborators                                                                       |
| P.J.                              | Mitchell   |                       |                  | Royal Melbourne Hospital                    | Melbourne, Australia                     | EXTEND-IA Executive committee, co-principal investigator and chair of neurointervention) | HERMES collaborators                                                                       |
| L.                                | Churilov   |                       |                  |                                             |                                          | EXTEND-IA Executive committee, statistician                                              | HERMES collaborators                                                                       |
| B.                                | Yan        |                       |                  | Royal Melbourne Hospital                    | Melbourne, Australia                     | EXTEND-IA Investigator enrolling clinical center                                         | HERMES collaborators                                                                       |
| R.J.                              | Dowling    |                       |                  | Royal Melbourne Hospital                    | Melbourne, Australia                     | EXTEND-IA Investigator enrolling clinical center                                         | HERMES collaborators                                                                       |
| N.                                | Yassi      |                       |                  | Royal Melbourne Hospital                    | Melbourne, Australia                     | EXTEND-IA Investigator enrolling clinical center                                         | HERMES collaborators                                                                       |



## Supplemental Online Content: Nonauthor Collaborators

\*First name, last name, and suffix (if applicable) are required and will appear in PubMed.

| *First Name and Middle Initial(s) | *Last Name | *Suffix (eg, Jr, III) | Academic Degrees | Institution                | Location (city, state/province, country) | Role or Contribution, eg, chair, principal investigator                       | Group (if more than 1 Group listed in the byline) and/or Subgroup (eg, Steering Committee) |
|-----------------------------------|------------|-----------------------|------------------|----------------------------|------------------------------------------|-------------------------------------------------------------------------------|--------------------------------------------------------------------------------------------|
| T.J.                              | Oxley      |                       |                  | Royal Melbourne Hospital   | Melbourne, Australia                     | EXTEND-IA Investigator enrolling clinical center                              | HERMES collaborators                                                                       |
| T.Y.                              | Wu         |                       |                  | Royal Melbourne Hospital   | Melbourne, Australia                     | EXTEND-IA Investigator enrolling clinical center                              | HERMES collaborators                                                                       |
| G.                                | Silver     |                       |                  | Royal Melbourne Hospital   | Melbourne, Australia                     | EXTEND-IA Investigator enrolling clinical center                              | HERMES collaborators                                                                       |
| A.                                | McDonald   |                       |                  | Royal Melbourne Hospital   | Melbourne, Australia                     | EXTEND-IA Investigator enrolling clinical center                              | HERMES collaborators                                                                       |
| R.                                | McCoy      |                       |                  | Royal Melbourne Hospital   | Melbourne, Australia                     | EXTEND-IA Investigator enrolling clinical center, Independent medical monitor | HERMES collaborators                                                                       |
| T.J.                              | Kleinig    |                       |                  | Royal Adelaide Hospital    | Adelaide, Australia                      | EXTEND-IA Investigator enrolling clinical center                              | HERMES collaborators                                                                       |
| R.                                | Scroop     |                       |                  | Royal Adelaide Hospital    | Adelaide, Australia                      | EXTEND-IA Investigator enrolling clinical center                              | HERMES collaborators                                                                       |
| H.M.                              | Dewey      |                       |                  | Austin Hospital            | Australia                                | EXTEND-IA Investigator enrolling clinical center                              | HERMES collaborators                                                                       |
| M.                                | Simpson    |                       |                  | Austin Hospital            | Australia                                | EXTEND-IA Investigator enrolling clinical center                              | HERMES collaborators                                                                       |
| M.                                | Brooks     |                       |                  | Austin Hospital            | Australia                                | EXTEND-IA Investigator enrolling clinical center                              | HERMES collaborators                                                                       |
| B.                                | Coulton    |                       |                  | Austin Hospital            | Australia                                | EXTEND-IA Investigator enrolling clinical center                              | HERMES collaborators                                                                       |
| M.                                | Krause     |                       |                  | Royal North Shore Hospital | Australia                                | EXTEND-IA Investigator enrolling clinical center                              | HERMES collaborators                                                                       |
| T.J.                              | Harrington |                       |                  | Royal North Shore Hospital | Australia                                | EXTEND-IA Investigator enrolling clinical center                              | HERMES collaborators                                                                       |
| B.                                | Steinfort  |                       |                  | Royal North Shore Hospital | Australia                                | EXTEND-IA Investigator enrolling clinical center                              | HERMES collaborators                                                                       |
| K.                                | Faulder    |                       |                  | Royal North Shore Hospital | Australia                                | EXTEND-IA Investigator enrolling clinical center                              | HERMES collaborators                                                                       |

## Supplemental Online Content: Nonauthor Collaborators

\*First name, last name, and suffix (if applicable) are required and will appear in PubMed.

| *First Name and Middle Initial(s) | *Last Name | *Suffix (eg, Jr, III) | Academic Degrees | Institution                | Location (city, state/province, country) | Role or Contribution, eg, chair, principal investigator | Group (if more than 1 Group listed in the byline) and/or Subgroup (eg, Steering Committee) |
|-----------------------------------|------------|-----------------------|------------------|----------------------------|------------------------------------------|---------------------------------------------------------|--------------------------------------------------------------------------------------------|
| M.                                | Priglinger |                       |                  | Royal North Shore Hospital | Australia                                | EXTEND-IA Investigator enrolling clinical center        | HERMES collaborators                                                                       |
| S.                                | Day        |                       |                  | Royal North Shore Hospital | Australia                                | EXTEND-IA Investigator enrolling clinical center        | HERMES collaborators                                                                       |
| T.                                | Phan       |                       |                  | Monash Medical Centre      | Australia                                | EXTEND-IA Investigator enrolling clinical center        | HERMES collaborators                                                                       |
| W.                                | Chong      |                       |                  | Monash Medical Centre      | Australia                                | EXTEND-IA Investigator enrolling clinical center        | HERMES collaborators                                                                       |
| M.                                | Holt       |                       |                  | Monash Medical Centre      | Australia                                | EXTEND-IA Investigator enrolling clinical center        | HERMES collaborators                                                                       |
| R.V.                              | Chandra    |                       |                  | Monash Medical Centre      | Australia                                | EXTEND-IA Investigator enrolling clinical center        | HERMES collaborators                                                                       |
| H.                                | Ma         |                       |                  | Monash Medical Centre      | Australia                                | EXTEND-IA Investigator enrolling clinical center        | HERMES collaborators                                                                       |
| D.                                | Young      |                       |                  | Monash Medical Centre      | Australia                                | EXTEND-IA Investigator enrolling clinical center        | HERMES collaborators                                                                       |
| K.                                | Wong       |                       |                  | Monash Medical Centre      | Australia                                | EXTEND-IA Investigator enrolling clinical center        | HERMES collaborators                                                                       |
| T.                                | Wijeratne  |                       |                  | Western Hospital           | Australia                                | EXTEND-IA Investigator enrolling clinical center        | HERMES collaborators                                                                       |
| H.                                | Tu         |                       |                  | Western Hospital           | Australia                                | EXTEND-IA Investigator enrolling clinical center        | HERMES collaborators                                                                       |
| E.                                | Mackay     |                       |                  | Western Hospital           | Australia                                | EXTEND-IA Investigator enrolling clinical center        | HERMES collaborators                                                                       |
| D.                                | Celestino  |                       |                  | Western Hospital           | Australia                                | EXTEND-IA Investigator enrolling clinical center        | HERMES collaborators                                                                       |
| C.F.                              | Bladin     |                       |                  | Box Hill Hospital          | Australia                                | EXTEND-IA Investigator enrolling clinical center        | HERMES collaborators                                                                       |
| P.S.                              | Loh        |                       |                  | Box Hill Hospital          | Australia                                | EXTEND-IA Investigator enrolling clinical center        | HERMES collaborators                                                                       |
| A.                                | Gilligan   |                       |                  | Box Hill Hospital          | Australia                                | EXTEND-IA Investigator enrolling clinical center        | HERMES collaborators                                                                       |

## Supplemental Online Content: Nonauthor Collaborators

\*First name, last name, and suffix (if applicable) are required and will appear in PubMed.

| *First Name and Middle Initial(s) | *Last Name  | *Suffix (eg, Jr, III) | Academic Degrees | Institution                    | Location (city, state/province, country) | Role or Contribution, eg, chair, principal investigator | Group (if more than 1 Group listed in the byline) and/or Subgroup (eg, Steering Committee) |
|-----------------------------------|-------------|-----------------------|------------------|--------------------------------|------------------------------------------|---------------------------------------------------------|--------------------------------------------------------------------------------------------|
| Z.                                | Ross        |                       |                  | Box Hill Hospital              | Australia                                | EXTEND-IA Investigator enrolling clinical center        | HERMES collaborators                                                                       |
| S.                                | Coote       |                       |                  | Box Hill Hospital              | Australia                                | EXTEND-IA Investigator enrolling clinical center        | HERMES collaborators                                                                       |
| T.                                | Frost       |                       |                  | Box Hill Hospital              | Australia                                | EXTEND-IA Investigator enrolling clinical center        | HERMES collaborators                                                                       |
| M.W.                              | Parsons     |                       |                  | John Hunter Hospital           | Australia                                | EXTEND-IA Investigator enrolling clinical center        | HERMES collaborators                                                                       |
| F.                                | Miteff      |                       |                  | John Hunter Hospital           | Australia                                | EXTEND-IA Investigator enrolling clinical center        | HERMES collaborators                                                                       |
| C.R.                              | Levi        |                       |                  | John Hunter Hospital           | Australia                                | EXTEND-IA Investigator enrolling clinical center        | HERMES collaborators                                                                       |
| T.                                | Ang         |                       |                  | John Hunter Hospital           | Australia                                | EXTEND-IA Investigator enrolling clinical center        | HERMES collaborators                                                                       |
| N.                                | Spratt      |                       |                  | John Hunter Hospital           | Australia                                | EXTEND-IA Investigator enrolling clinical center        | HERMES collaborators                                                                       |
| L.                                | Kaauwai     |                       |                  | John Hunter Hospital           | Australia                                | EXTEND-IA Investigator enrolling clinical center        | HERMES collaborators                                                                       |
| M.                                | Badve       |                       |                  | Gold Coast University Hospital | Australia                                | EXTEND-IA Investigator enrolling clinical center        | HERMES collaborators                                                                       |
| H.                                | Rice        |                       |                  | Gold Coast University Hospital | Australia                                | EXTEND-IA Investigator enrolling clinical center        | HERMES collaborators                                                                       |
| L.                                | de Villiers |                       |                  | Gold Coast University Hospital | Australia                                | EXTEND-IA Investigator enrolling clinical center        | HERMES collaborators                                                                       |
| P.A.                              | Barber      |                       |                  | Auckland City Hospital         | New Zealand                              | EXTEND-IA Investigator enrolling clinical center        | HERMES collaborators                                                                       |
| B.                                | McGuinness  |                       |                  | Auckland City Hospital         | New Zealand                              | EXTEND-IA Investigator enrolling clinical center        | HERMES collaborators                                                                       |
| A.                                | Hope        |                       |                  | Auckland City Hospital         | New Zealand                              | EXTEND-IA Investigator enrolling clinical center        | HERMES collaborators                                                                       |
| M.                                | Moriarty    |                       |                  | Auckland City Hospital         | New Zealand                              | EXTEND-IA Investigator enrolling clinical center        | HERMES collaborators                                                                       |

## Supplemental Online Content: Nonauthor Collaborators

\*First name, last name, and suffix (if applicable) are required and will appear in PubMed.

| *First Name and Middle Initial(s) | *Last Name | *Suffix (eg, Jr, III) | Academic Degrees | Institution                         | Location (city, state/province, country) | Role or Contribution, eg, chair, principal investigator        | Group (if more than 1 Group listed in the byline) and/or Subgroup (eg, Steering Committee) |
|-----------------------------------|------------|-----------------------|------------------|-------------------------------------|------------------------------------------|----------------------------------------------------------------|--------------------------------------------------------------------------------------------|
| P.                                | Bennett    |                       |                  | Auckland City Hospital              | New Zealand                              | EXTEND-IA Investigator enrolling clinical center               | HERMES collaborators                                                                       |
| Andrew                            | Wong       |                       |                  | Royal Brisbane and Women's Hospital |                                          | EXTEND-IA Investigator non-enrolling site                      | HERMES collaborators                                                                       |
| Alan                              | Coulthard  |                       |                  | Royal Brisbane and Women's Hospital |                                          | EXTEND-IA Investigator non-enrolling site                      | HERMES collaborators                                                                       |
| Andrew                            | Lee        |                       |                  | Flinders Medical Centre             |                                          | EXTEND-IA Investigator non-enrolling site                      | HERMES collaborators                                                                       |
| Jim                               | Jannes     |                       |                  | Queen Elisabeth Hospital            |                                          | EXTEND-IA Investigator non-enrolling site                      | HERMES collaborators                                                                       |
| Deborah                           | Field      |                       |                  | Lyell McEwin Hospital               |                                          | EXTEND-IA Investigator non-enrolling site                      | HERMES collaborators                                                                       |
| G.                                | Sharma     |                       |                  | Royal Melbourne Hospital            |                                          | EXTEND-IA Image analysis center                                | HERMES collaborators                                                                       |
| S.                                | Salinas    |                       |                  | Royal Melbourne Hospital            |                                          | EXTEND-IA Image analysis center                                | HERMES collaborators                                                                       |
| E.                                | Cowley     |                       |                  |                                     |                                          | EXTEND-IA Independent medical monitor                          | HERMES collaborators                                                                       |
| B.                                | Snow       |                       |                  |                                     |                                          | EXTEND-IA DSMB (Chair)                                         | HERMES collaborators                                                                       |
| J.                                | Kolbe      |                       |                  |                                     |                                          | EXTEND-IA DSMB                                                 | HERMES collaborators                                                                       |
| R.                                | Stark      |                       |                  |                                     |                                          | EXTEND-IA DSMB                                                 | HERMES collaborators                                                                       |
| J.                                | King       |                       |                  |                                     |                                          | EXTEND-IA DSMB                                                 | HERMES collaborators                                                                       |
| R.                                | Macdonnel  |                       |                  |                                     |                                          | EXTEND-IA DSMB                                                 | HERMES collaborators                                                                       |
| J                                 | Attia      |                       |                  |                                     |                                          | EXTEND-IA DSMB                                                 | HERMES collaborators                                                                       |
| C.                                | D'Este     |                       |                  |                                     |                                          | EXTEND-IA DSMB (Independent statistician)                      | HERMES collaborators                                                                       |
| Jeffrey A.                        | Saver      |                       |                  | David Geffen School of Medicine     | California, US                           | Global Principal Investigator SWIFT PRIME, Executive committee | HERMES collaborators                                                                       |

## Supplemental Online Content: Nonauthor Collaborators

\*First name, last name, and suffix (if applicable) are required and will appear in PubMed.

| *First Name and Middle Initial(s) | *Last Name | *Suffix (eg, Jr, III) | Academic Degrees | Institution                                                                                        | Location (city, state/province, country) | Role or Contribution, eg, chair, principal investigator                                                 | Group (if more than 1 Group listed in the byline) and/or Subgroup (eg, Steering Committee) |
|-----------------------------------|------------|-----------------------|------------------|----------------------------------------------------------------------------------------------------|------------------------------------------|---------------------------------------------------------------------------------------------------------|--------------------------------------------------------------------------------------------|
| Mayank                            | Goyal      |                       |                  | University of Calgary                                                                              | Calgary, Canada                          | Global Imaging and Workflow Principal Investigator SWIFT PRIME, Executive committee                     | HERMES collaborators                                                                       |
| Hans-Christoph                    | Diener     |                       |                  | University Hospital of Duisburg                                                                    | Essen, Germany                           | EU Principal Investigator SWIFT PRIME, Executive committee                                              | HERMES collaborators                                                                       |
| Elad I.                           | Levy       |                       |                  | University of Buffalo<br>Neurosurgery/Buffalo General Hospital                                     | Buffalo, US                              | US Principal Investigator SWIFT PRIME, Executive committee, Investigator/study personnel enrolling site | HERMES collaborators                                                                       |
| Alain                             | Bonafé     |                       |                  | CHU Montpellier - Hôpital Gui de Chauliac                                                          | Montpellier, France                      | EU Principal Investigator SWIFT PRIME, Executive committee, PI enrolling site                           | HERMES collaborators                                                                       |
| Vitor M.                          | Pereira    |                       |                  | University of Toronto                                                                              | Toronto, Canada                          | EU Principal Investigator SWIFT PRIME, Executive committee                                              | HERMES collaborators                                                                       |
| Reza                              | Jahan      |                       |                  | UCLA / Ronald Reagan UCLA Medical Center                                                           | California, US                           | Interventional Advisor SWIFT Prime, Executive committee, Investigator/study personnel enrolling site    | HERMES collaborators                                                                       |
| Gregory W.                        | Albers     |                       |                  | Stanford University School of Medicine                                                             | California, US                           | Steering Committee SWIFT PRIME                                                                          | HERMES collaborators                                                                       |
| Christophe                        | Cognard    |                       |                  | University Hospital of Toulouse                                                                    | Toulouse, France                         | Steering Committee SWIFT PRIME                                                                          | HERMES collaborators                                                                       |
| David J.                          | Cohen      |                       |                  | Saint Luke's Mid America Heart Institute and University of Missouri–Kansas City School of Medicine | Kansas City                              | Steering Committee SWIFT PRIME                                                                          | HERMES collaborators                                                                       |

## Supplemental Online Content: Nonauthor Collaborators

\*First name, last name, and suffix (if applicable) are required and will appear in PubMed.

| *First Name and Middle Initial(s) | *Last Name    | *Suffix (eg, Jr, III) | Academic Degrees | Institution                                                    | Location (city, state/province, country) | Role or Contribution, eg, chair, principal investigator                     | Group (if more than 1 Group listed in the byline) and/or Subgroup (eg, Steering Committee) |
|-----------------------------------|---------------|-----------------------|------------------|----------------------------------------------------------------|------------------------------------------|-----------------------------------------------------------------------------|--------------------------------------------------------------------------------------------|
| Werner                            | Hacke         |                       |                  | University of Heidelberg                                       | Heidelberg, Germany                      | Steering Committee SWIFT PRIME                                              | HERMES collaborators                                                                       |
| Olav                              | Jansen        |                       |                  | Universitätsklinikum Kiel                                      | Kiel, Germany                            | Steering Committee SWIFT PRIME, PI enrolling site                           | HERMES collaborators                                                                       |
| Tudor G.                          | Jovin         |                       |                  | University of Pittsburgh Medical Center                        | Pittsburgh, US                           | Steering Committee SWIFT PRIME, Investigator/study personnel enrolling site | HERMES collaborators                                                                       |
| Heinrich P.                       | Mattle        |                       |                  | University of Bern                                             | Bern, Switzerland                        | Steering Committee SWIFT PRIME                                              | HERMES collaborators                                                                       |
| Raul G.                           | Nogueira      |                       |                  | Emory University / Grady Medical Center                        | Atlanta, UK                              | Steering Committee SWIFT PRIME, PI enrolling site                           | HERMES collaborators                                                                       |
| Adnan H.                          | Siddiqui      |                       |                  | University of Buffalo Neurosurgery/Buffalo General Hospital    | Buffalo, US                              | Steering Committee SWIFT PRIME, PI enrolling site                           | HERMES collaborators                                                                       |
| Dileep R.                         | Yavagal       |                       |                  | University of Miami / Jackson Memorial Hospital                | Miami, US                                | Steering Committee SWIFT PRIME, PI enrolling site                           | HERMES collaborators                                                                       |
| Rüdiger                           | von Kummer    |                       |                  |                                                                |                                          | DSMC SWIFT PRIME                                                            | HERMES collaborators                                                                       |
| Wade                              | Smith         |                       |                  |                                                                |                                          | DSMC SWIFT PRIME                                                            | HERMES collaborators                                                                       |
| Francis                           | Turjman       |                       |                  |                                                                |                                          | DSMC SWIFT PRIME                                                            | HERMES collaborators                                                                       |
| Scott                             | Hamilton      |                       |                  |                                                                |                                          | DSMC SWIFT PRIME                                                            | HERMES collaborators                                                                       |
| Richard                           | Chiacchierini |                       |                  |                                                                |                                          | DSMC SWIFT PRIME                                                            | HERMES collaborators                                                                       |
| Arun                              | Amar          |                       |                  |                                                                |                                          | Clinical Events committee SWIFT PRIME                                       | HERMES collaborators                                                                       |
| Nerses                            | Sanossian     |                       |                  |                                                                |                                          | Clinical Events committee SWIFT PRIME                                       | HERMES collaborators                                                                       |
| Yince                             | Loh           |                       |                  |                                                                |                                          | Clinical Events committee SWIFT PRIME                                       | HERMES collaborators                                                                       |
| Thomas G.                         | Devlin        |                       |                  | Chattanooga Center for Neurologic Research / Erlanger Hospital | Chattanooga, Tennessee, UK               | PI enrolling site SWIFT PRIME                                               | HERMES collaborators                                                                       |

## Supplemental Online Content: Nonauthor Collaborators

\*First name, last name, and suffix (if applicable) are required and will appear in PubMed.

| *First Name and Middle Initial(s) | *Last Name  | *Suffix (eg, Jr, III) | Academic Degrees | Institution                                                    | Location (city, state/province, country) | Role or Contribution, eg, chair, principal investigator | Group (if more than 1 Group listed in the byline) and/or Subgroup (eg, Steering Committee) |
|-----------------------------------|-------------|-----------------------|------------------|----------------------------------------------------------------|------------------------------------------|---------------------------------------------------------|--------------------------------------------------------------------------------------------|
| Blaise W.                         | Baxter      |                       |                  | Chattanooga Center for Neurologic Research / Erlanger Hospital | Chattanooga, Tennessee, UK               | Investigator/study personnel enrolling site SWIFT PRIME | HERMES collaborators                                                                       |
| H.                                | Hawk        |                       |                  | Chattanooga Center for Neurologic Research / Erlanger Hospital | Chattanooga, Tennessee, UK               | Investigator/study personnel enrolling site SWIFT PRIME | HERMES collaborators                                                                       |
| B.                                | Sapkota     |                       |                  | Chattanooga Center for Neurologic Research / Erlanger Hospital | Chattanooga, Tennessee, UK               | Investigator/study personnel enrolling site SWIFT PRIME | HERMES collaborators                                                                       |
| S.                                | Quarfordt   |                       |                  | Chattanooga Center for Neurologic Research / Erlanger Hospital | Chattanooga, Tennessee, UK               | Investigator/study personnel enrolling site SWIFT PRIME | HERMES collaborators                                                                       |
| A.                                | Sirelkhatim |                       |                  | Chattanooga Center for Neurologic Research / Erlanger Hospital | Chattanooga, Tennessee, UK               | Investigator/study personnel enrolling site SWIFT PRIME | HERMES collaborators                                                                       |
| C.                                | Dellinger   |                       |                  | Chattanooga Center for Neurologic Research / Erlanger Hospital | Chattanooga, Tennessee, UK               | Investigator/study personnel enrolling site SWIFT PRIME | HERMES collaborators                                                                       |
| K.                                | Barton      |                       |                  | Chattanooga Center for Neurologic Research / Erlanger Hospital | Chattanooga, Tennessee, UK               | Investigator/study personnel enrolling site SWIFT PRIME | HERMES collaborators                                                                       |
| Vivek K.                          | Reddy       |                       |                  | University of Pittsburgh Medical Center                        | Pittsburgh, US                           | PI enrolling site SWIFT PRIME                           | HERMES collaborators                                                                       |
| A.                                | Ducruet     |                       |                  | University of Pittsburgh Medical Center                        | Pittsburgh, US                           | Investigator/study personnel enrolling site SWIFT PRIME | HERMES collaborators                                                                       |
| A.                                | Jadhav      |                       |                  | University of Pittsburgh Medical Center                        | Pittsburgh, US                           | Investigator/study personnel enrolling site SWIFT PRIME | HERMES collaborators                                                                       |
| A.                                | Horev       |                       |                  | University of Pittsburgh Medical Center                        | Pittsburgh, US                           | Investigator/study personnel enrolling site SWIFT PRIME | HERMES collaborators                                                                       |

## Supplemental Online Content: Nonauthor Collaborators

\*First name, last name, and suffix (if applicable) are required and will appear in PubMed.

| *First Name and Middle Initial(s) | *Last Name | *Suffix (eg, Jr, III) | Academic Degrees | Institution                             | Location (city, state/province, country) | Role or Contribution, eg, chair, principal investigator | Group (if more than 1 Group listed in the byline) and/or Subgroup (eg, Steering Committee) |
|-----------------------------------|------------|-----------------------|------------------|-----------------------------------------|------------------------------------------|---------------------------------------------------------|--------------------------------------------------------------------------------------------|
| D-V.                              | Giurgiutiu |                       |                  | University of Pittsburgh Medical Center | Pittsburgh, US                           | Investigator/study personnel enrolling site SWIFT PRIME | HERMES collaborators                                                                       |
| V.K.                              | Totoraitis |                       |                  | University of Pittsburgh Medical Center | Pittsburgh, US                           | Investigator/study personnel enrolling site SWIFT PRIME | HERMES collaborators                                                                       |
| M.                                | Hammer     |                       |                  | University of Pittsburgh Medical Center | Pittsburgh, US                           | Investigator/study personnel enrolling site SWIFT PRIME | HERMES collaborators                                                                       |
| B.                                | Jankowitz  |                       |                  | University of Pittsburgh Medical Center | Pittsburgh, US                           | Investigator/study personnel enrolling site SWIFT PRIME | HERMES collaborators                                                                       |
| L.                                | Wechsler   |                       |                  | University of Pittsburgh Medical Center | Pittsburgh, US                           | Investigator/study personnel enrolling site SWIFT PRIME | HERMES collaborators                                                                       |
| M.                                | Rocha      |                       |                  | University of Pittsburgh Medical Center | Pittsburgh, US                           | Investigator/study personnel enrolling site SWIFT PRIME | HERMES collaborators                                                                       |
| D.                                | Gulati     |                       |                  | University of Pittsburgh Medical Center | Pittsburgh, US                           | Investigator/study personnel enrolling site SWIFT PRIME | HERMES collaborators                                                                       |
| D.                                | Campbell   |                       |                  | University of Pittsburgh Medical Center | Pittsburgh, US                           | Investigator/study personnel enrolling site SWIFT PRIME | HERMES collaborators                                                                       |
| M.                                | Star       |                       |                  | University of Pittsburgh Medical Center | Pittsburgh, US                           | Investigator/study personnel enrolling site SWIFT PRIME | HERMES collaborators                                                                       |
| L.                                | Baxendell  |                       |                  | University of Pittsburgh Medical Center | Pittsburgh, US                           | Investigator/study personnel enrolling site SWIFT PRIME | HERMES collaborators                                                                       |



## Supplemental Online Content: Nonauthor Collaborators

\*First name, last name, and suffix (if applicable) are required and will appear in PubMed.

| *First Name and Middle Initial(s) | *Last Name | *Suffix (eg, Jr, III) | Academic Degrees | Institution                                                 | Location (city, state/province, country) | Role or Contribution, eg, chair, principal investigator | Group (if more than 1 Group listed in the byline) and/or Subgroup (eg, Steering Committee) |
|-----------------------------------|------------|-----------------------|------------------|-------------------------------------------------------------|------------------------------------------|---------------------------------------------------------|--------------------------------------------------------------------------------------------|
| J.                                | Oakley     |                       |                  | University of Pittsburgh Medical Center                     | Pittsburgh, US                           | Investigator/study personnel enrolling site SWIFT PRIME | HERMES collaborators                                                                       |
| L.N.                              | Hopkins    |                       |                  | University of Buffalo Neurosurgery/Buffalo General Hospital |                                          | Investigator/study personnel enrolling site SWIFT PRIME | HERMES collaborators                                                                       |
| K.                                | Snyder     |                       |                  | University of Buffalo Neurosurgery/Buffalo General Hospital |                                          | Investigator/study personnel enrolling site SWIFT PRIME | HERMES collaborators                                                                       |
| R.                                | Sawyer     |                       |                  | University of Buffalo Neurosurgery/Buffalo General Hospital |                                          | Investigator/study personnel enrolling site SWIFT PRIME | HERMES collaborators                                                                       |
| S.                                | Hall       |                       |                  | University of Buffalo Neurosurgery/Buffalo General Hospital |                                          | Investigator/study personnel enrolling site SWIFT PRIME | HERMES collaborators                                                                       |
| V.                                | Costalat   |                       |                  | CHU Montpellier - Hôpital Gui de Chauliac                   | Montpellier, France                      | Investigator/study personnel enrolling site SWIFT PRIME | HERMES collaborators                                                                       |
| C.                                | Riquelme   |                       |                  | CHU Montpellier - Hôpital Gui de Chauliac                   | Montpellier, France                      | Investigator/study personnel enrolling site SWIFT PRIME | HERMES collaborators                                                                       |
| P.                                | Machi      |                       |                  | CHU Montpellier - Hôpital Gui de Chauliac                   | Montpellier, France                      | Investigator/study personnel enrolling site SWIFT PRIME | HERMES collaborators                                                                       |
| E.                                | Omer       |                       |                  | CHU Montpellier - Hôpital Gui de Chauliac                   | Montpellier, France                      | Investigator/study personnel enrolling site SWIFT PRIME | HERMES collaborators                                                                       |
| C.                                | Arquizan   |                       |                  | CHU Montpellier - Hôpital Gui de Chauliac                   | Montpellier, France                      | Investigator/study personnel enrolling site SWIFT PRIME | HERMES collaborators                                                                       |

## Supplemental Online Content: Nonauthor Collaborators

\*First name, last name, and suffix (if applicable) are required and will appear in PubMed.

| *First Name and Middle Initial(s) | *Last Name             | *Suffix (eg, Jr, III) | Academic Degrees | Institution                                                 | Location (city, state/province, country) | Role or Contribution, eg, chair, principal investigator | Group (if more than 1 Group listed in the byline) and/or Subgroup (eg, Steering Committee) |
|-----------------------------------|------------------------|-----------------------|------------------|-------------------------------------------------------------|------------------------------------------|---------------------------------------------------------|--------------------------------------------------------------------------------------------|
| I.                                | Mourand                |                       |                  | CHU Montpellier - Hôpital Gui de Chauliac                   | Montpellier, France                      | Investigator/study personnel enrolling site SWIFT PRIME | HERMES collaborators                                                                       |
| M.                                | Charif                 |                       |                  | CHU Montpellier - Hôpital Gui de Chauliac                   | Montpellier, France                      | Investigator/study personnel enrolling site SWIFT PRIME | HERMES collaborators                                                                       |
| X.                                | Ayrignac               |                       |                  | CHU Montpellier - Hôpital Gui de Chauliac                   | Montpellier, France                      | Investigator/study personnel enrolling site SWIFT PRIME | HERMES collaborators                                                                       |
| N.                                | Menjot de Champleur    |                       |                  | CHU Montpellier - Hôpital Gui de Chauliac                   | Montpellier, France                      | Investigator/study personnel enrolling site SWIFT PRIME | HERMES collaborators                                                                       |
| N.                                | Leboucq                |                       |                  | CHU Montpellier - Hôpital Gui de Chauliac                   | Montpellier, France                      | Investigator/study personnel enrolling site SWIFT PRIME | HERMES collaborators                                                                       |
| G.                                | Gascou                 |                       |                  | CHU Montpellier - Hôpital Gui de Chauliac                   | Montpellier, France                      | Investigator/study personnel enrolling site SWIFT PRIME | HERMES collaborators                                                                       |
| M.                                | Moynier                |                       |                  | CHU Montpellier - Hôpital Gui de Chauliac                   | Montpellier, France                      | Investigator/study personnel enrolling site SWIFT PRIME | HERMES collaborators                                                                       |
| Richard                           | du Mesnil de Rochemont |                       |                  | Klinikum der Johann Wolfgang Goethe-Universität – Frankfurt | Frankfurt, Germany                       | PI enrolling site SWIFT PRIME                           | HERMES collaborators                                                                       |
| Oliver                            | Singer                 |                       |                  | Klinikum der Johann Wolfgang Goethe-Universität             | Frankfurt, Germany                       | Investigator/study personnel enrolling site SWIFT PRIME | HERMES collaborators                                                                       |
| J.                                | Berkefeld              |                       |                  | Klinikum der Johann Wolfgang Goethe-Universität             | Frankfurt, Germany                       | Investigator/study personnel enrolling site SWIFT PRIME | HERMES collaborators                                                                       |
| C.                                | Foerch                 |                       |                  | Klinikum der Johann Wolfgang Goethe-Universität             | Frankfurt, Germany                       | Investigator/study personnel enrolling site SWIFT PRIME | HERMES collaborators                                                                       |

## Supplemental Online Content: Nonauthor Collaborators

\*First name, last name, and suffix (if applicable) are required and will appear in PubMed.

| *First Name and Middle Initial(s) | *Last Name   | *Suffix (eg, Jr, III) | Academic Degrees | Institution                                     | Location (city, state/province, country) | Role or Contribution, eg, chair, principal investigator | Group (if more than 1 Group listed in the byline) and/or Subgroup (eg, Steering Committee) |
|-----------------------------------|--------------|-----------------------|------------------|-------------------------------------------------|------------------------------------------|---------------------------------------------------------|--------------------------------------------------------------------------------------------|
| M.                                | Lorenz       |                       |                  | Klinikum der Johann Wolfgang Goethe-Universität | Frankfurt, Germany                       | Investigator/study personnel enrolling site SWIFT PRIME | HERMES collaborators                                                                       |
| W.                                | Pfeilschifer |                       |                  | Klinikum der Johann Wolfgang Goethe-Universität | Frankfurt, Germany                       | Investigator/study personnel enrolling site SWIFT PRIME | HERMES collaborators                                                                       |
| E.                                | Hattingen    |                       |                  | Klinikum der Johann Wolfgang Goethe-Universität | Frankfurt, Germany                       | Investigator/study personnel enrolling site SWIFT PRIME | HERMES collaborators                                                                       |
| M.                                | Wagner       |                       |                  | Klinikum der Johann Wolfgang Goethe-Universität | Frankfurt, Germany                       | Investigator/study personnel enrolling site SWIFT PRIME | HERMES collaborators                                                                       |
| S-J.                              | You          |                       |                  | Klinikum der Johann Wolfgang Goethe-Universität | Frankfurt, Germany                       | Investigator/study personnel enrolling site SWIFT PRIME | HERMES collaborators                                                                       |
| S.                                | Lescher      |                       |                  | Klinikum der Johann Wolfgang Goethe-Universität | Frankfurt, Germany                       | Investigator/study personnel enrolling site SWIFT PRIME | HERMES collaborators                                                                       |
| H.                                | Braun        |                       |                  | Klinikum der Johann Wolfgang Goethe-Universität | Frankfurt, Germany                       | Investigator/study personnel enrolling site SWIFT PRIME | HERMES collaborators                                                                       |
| S.                                | Dehkharghani |                       |                  | Emory University / Grady Medical Center         |                                          | Investigator/study personnel enrolling site SWIFT PRIME | HERMES collaborators                                                                       |
| S.R.                              | Belagaje     |                       |                  | Emory University / Grady Medical Center         |                                          | Investigator/study personnel enrolling site SWIFT PRIME | HERMES collaborators                                                                       |
| A.                                | Anderson     |                       |                  | Emory University / Grady Medical Center         |                                          | Investigator/study personnel enrolling site SWIFT PRIME | HERMES collaborators                                                                       |

## Supplemental Online Content: Nonauthor Collaborators

\*First name, last name, and suffix (if applicable) are required and will appear in PubMed.

| *First Name and Middle Initial(s) | *Last Name | *Suffix (eg, Jr, III) | Academic Degrees | Institution                             | Location (city, state/province, country) | Role or Contribution, eg, chair, principal investigator | Group (if more than 1 Group listed in the byline) and/or Subgroup (eg, Steering Committee) |
|-----------------------------------|------------|-----------------------|------------------|-----------------------------------------|------------------------------------------|---------------------------------------------------------|--------------------------------------------------------------------------------------------|
| A.                                | Lima       |                       |                  | Emory University / Grady Medical Center |                                          | Investigator/study personnel enrolling site SWIFT PRIME | HERMES collaborators                                                                       |
| M.                                | Obideen    |                       |                  | Emory University / Grady Medical Center |                                          | Investigator/study personnel enrolling site SWIFT PRIME | HERMES collaborators                                                                       |
| D.                                | Haussen    |                       |                  | Emory University / Grady Medical Center |                                          | Investigator/study personnel enrolling site SWIFT PRIME | HERMES collaborators                                                                       |
| R.                                | Dharia     |                       |                  | Emory University / Grady Medical Center |                                          | Investigator/study personnel enrolling site SWIFT PRIME | HERMES collaborators                                                                       |
| M.                                | Frankel    |                       |                  | Emory University / Grady Medical Center |                                          | Investigator/study personnel enrolling site SWIFT PRIME | HERMES collaborators                                                                       |
| V.                                | Patel      |                       |                  | Emory University / Grady Medical Center |                                          | Investigator/study personnel enrolling site SWIFT PRIME | HERMES collaborators                                                                       |
| K.                                | Owada      |                       |                  | Emory University / Grady Medical Center |                                          | Investigator/study personnel enrolling site SWIFT PRIME | HERMES collaborators                                                                       |
| A.                                | Saad       |                       |                  | Emory University / Grady Medical Center |                                          | Investigator/study personnel enrolling site SWIFT PRIME | HERMES collaborators                                                                       |
| L.                                | Amerson    |                       |                  | Emory University / Grady Medical Center |                                          | Investigator/study personnel enrolling site SWIFT PRIME | HERMES collaborators                                                                       |
| C.                                | Horn       |                       |                  | Emory University / Grady Medical Center |                                          | Investigator/study personnel enrolling site SWIFT PRIME | HERMES collaborators                                                                       |

## Supplemental Online Content: Nonauthor Collaborators

\*First name, last name, and suffix (if applicable) are required and will appear in PubMed.

| *First Name and Middle Initial(s) | *Last Name  | *Suffix (eg, Jr, III) | Academic Degrees | Institution                             | Location (city, state/province, country) | Role or Contribution, eg, chair, principal investigator | Group (if more than 1 Group listed in the byline) and/or Subgroup (eg, Steering Committee) |
|-----------------------------------|-------------|-----------------------|------------------|-----------------------------------------|------------------------------------------|---------------------------------------------------------|--------------------------------------------------------------------------------------------|
| S.                                | Doppelheuer |                       |                  | Emory University / Grady Medical Center |                                          | Investigator/study personnel enrolling site SWIFT PRIME | HERMES collaborators                                                                       |
| K.                                | Schindler   |                       |                  | Emory University / Grady Medical Center |                                          | Investigator/study personnel enrolling site SWIFT PRIME | HERMES collaborators                                                                       |
| Demetrius K.                      | Lopes       |                       |                  | Rush University Medical Center          | Chicago, US                              | PI enrolling site SWIFT PRIME                           | HERMES collaborators                                                                       |
| M.                                | Chen        |                       |                  | Rush University Medical Center          | Chicago, US                              | Investigator/study personnel enrolling site SWIFT PRIME | HERMES collaborators                                                                       |
| R.                                | Moftakhar   |                       |                  | Rush University Medical Center          | Chicago, US                              | Investigator/study personnel enrolling site SWIFT PRIME | HERMES collaborators                                                                       |
| C.                                | Anton       |                       |                  | Rush University Medical Center          | Chicago, US                              | Investigator/study personnel enrolling site SWIFT PRIME | HERMES collaborators                                                                       |
| M.                                | Smreczak    |                       |                  | Rush University Medical Center          | Chicago, US                              | Investigator/study personnel enrolling site SWIFT PRIME | HERMES collaborators                                                                       |
| J.S.                              | Carpenter   |                       |                  | West Virginia University Hospital       |                                          | PI enrolling site SWIFT PRIME                           | HERMES collaborators                                                                       |
| S.                                | Boo         |                       |                  | West Virginia University Hospital       |                                          | Investigator/study personnel enrolling site SWIFT PRIME | HERMES collaborators                                                                       |
| A.                                | Rai         |                       |                  | West Virginia University Hospital       |                                          | Investigator/study personnel enrolling site SWIFT PRIME | HERMES collaborators                                                                       |
| T.                                | Roberts     |                       |                  | West Virginia University Hospital       |                                          | Investigator/study personnel enrolling site SWIFT PRIME | HERMES collaborators                                                                       |

## Supplemental Online Content: Nonauthor Collaborators

\*First name, last name, and suffix (if applicable) are required and will appear in PubMed.

| *First Name and Middle Initial(s) | *Last Name | *Suffix (eg, Jr, III) | Academic Degrees | Institution                       | Location (city, state/province, country) | Role or Contribution, eg, chair, principal investigator | Group (if more than 1 Group listed in the byline) and/or Subgroup (eg, Steering Committee) |
|-----------------------------------|------------|-----------------------|------------------|-----------------------------------|------------------------------------------|---------------------------------------------------------|--------------------------------------------------------------------------------------------|
| A.                                | Tarabishy  |                       |                  | West Virginia University Hospital |                                          | Investigator/study personnel enrolling site SWIFT PRIME | HERMES collaborators                                                                       |
| L.                                | Gutmann    |                       |                  | West Virginia University Hospital |                                          | Investigator/study personnel enrolling site SWIFT PRIME | HERMES collaborators                                                                       |
| C.                                | Brooks     |                       |                  | West Virginia University Hospital |                                          | Investigator/study personnel enrolling site SWIFT PRIME | HERMES collaborators                                                                       |
| J.                                | Brick      |                       |                  | West Virginia University Hospital |                                          | Investigator/study personnel enrolling site SWIFT PRIME | HERMES collaborators                                                                       |
| J.                                | Dominico   |                       |                  | West Virginia University Hospital |                                          | Investigator/study personnel enrolling site SWIFT PRIME | HERMES collaborators                                                                       |
| G.                                | Reimann    |                       |                  | Klinikum Dortmund                 |                                          | PI enrolling site SWIFT PRIME                           | HERMES collaborators                                                                       |
| K.                                | Hinrichs   |                       |                  | Klinikum Dortmund                 |                                          | Investigator/study personnel enrolling site SWIFT PRIME | HERMES collaborators                                                                       |
| M.                                | Becker     |                       |                  | Klinikum Dortmund                 |                                          | Investigator/study personnel enrolling site SWIFT PRIME | HERMES collaborators                                                                       |
| E.                                | Heiss      |                       |                  | Klinikum Dortmund                 |                                          | Investigator/study personnel enrolling site SWIFT PRIME | HERMES collaborators                                                                       |
| C.                                | Selle      |                       |                  | Klinikum Dortmund                 |                                          | Investigator/study personnel enrolling site SWIFT PRIME | HERMES collaborators                                                                       |
| A.                                | Witteler   |                       |                  | Klinikum Dortmund                 |                                          | Investigator/study personnel enrolling site SWIFT PRIME | HERMES collaborators                                                                       |

## Supplemental Online Content: Nonauthor Collaborators

\*First name, last name, and suffix (if applicable) are required and will appear in PubMed.

| *First Name and Middle Initial(s) | *Last Name  | *Suffix (eg, Jr, III) | Academic Degrees | Institution                | Location (city, state/province, country) | Role or Contribution, eg, chair, principal investigator | Group (if more than 1 Group listed in the byline) and/or Subgroup (eg, Steering Committee) |
|-----------------------------------|-------------|-----------------------|------------------|----------------------------|------------------------------------------|---------------------------------------------------------|--------------------------------------------------------------------------------------------|
| S.                                | Al-Boutros  |                       |                  | Klinikum Dortmund          |                                          | Investigator/study personnel enrolling site SWIFT PRIME | HERMES collaborators                                                                       |
| M-J.                              | Danch       |                       |                  | Klinikum Dortmund          |                                          | Investigator/study personnel enrolling site SWIFT PRIME | HERMES collaborators                                                                       |
| A.                                | Ranft       |                       |                  | Klinikum Dortmund          |                                          | Investigator/study personnel enrolling site SWIFT PRIME | HERMES collaborators                                                                       |
| S.                                | Rohde       |                       |                  | Klinikum Dortmund          |                                          | Investigator/study personnel enrolling site SWIFT PRIME | HERMES collaborators                                                                       |
| K.                                | Burg        |                       |                  | Klinikum Dortmund          |                                          | Investigator/study personnel enrolling site SWIFT PRIME | HERMES collaborators                                                                       |
| C.                                | Weimar      |                       |                  | Universitätsklinikum Essen |                                          | PI enrolling site SWIFT PRIME                           | HERMES collaborators                                                                       |
| V.                                | Zegarac     |                       |                  | Universitätsklinikum Essen |                                          | Investigator/study personnel enrolling site SWIFT PRIME | HERMES collaborators                                                                       |
| C.                                | Hartmann    |                       |                  | Universitätsklinikum Essen |                                          | Investigator/study personnel enrolling site SWIFT PRIME | HERMES collaborators                                                                       |
| M.                                | Schlamann   |                       |                  | Universitätsklinikum Essen |                                          | Investigator/study personnel enrolling site SWIFT PRIME | HERMES collaborators                                                                       |
| S.                                | Göricke     |                       |                  | Universitätsklinikum Essen |                                          | Investigator/study personnel enrolling site SWIFT PRIME | HERMES collaborators                                                                       |
| A.                                | Ringlestein |                       |                  | Universitätsklinikum Essen |                                          | Investigator/study personnel enrolling site SWIFT PRIME | HERMES collaborators                                                                       |

## Supplemental Online Content: Nonauthor Collaborators

\*First name, last name, and suffix (if applicable) are required and will appear in PubMed.

| *First Name and Middle Initial(s) | *Last Name  | *Suffix (eg, Jr, III) | Academic Degrees | Institution                                              | Location (city, state/province, country) | Role or Contribution, eg, chair, principal investigator | Group (if more than 1 Group listed in the byline) and/or Subgroup (eg, Steering Committee) |
|-----------------------------------|-------------|-----------------------|------------------|----------------------------------------------------------|------------------------------------------|---------------------------------------------------------|--------------------------------------------------------------------------------------------|
| I.                                | Wanke       |                       |                  | Universitätsklinikum Essen                               |                                          | Investigator/study personnel enrolling site SWIFT PRIME | HERMES collaborators                                                                       |
| C.                                | Mönninghoff |                       |                  | Universitätsklinikum Essen                               |                                          | Investigator/study personnel enrolling site SWIFT PRIME | HERMES collaborators                                                                       |
| M.                                | Dietzold    |                       |                  | Universitätsklinikum Essen                               |                                          | Investigator/study personnel enrolling site SWIFT PRIME | HERMES collaborators                                                                       |
| R.                                | Budzik      |                       |                  | Health Research Institute / Riverside Methodist Hospital |                                          | PI enrolling site SWIFT PRIME                           | HERMES collaborators                                                                       |
| T.                                | Davis       |                       |                  | Health Research Institute / Riverside Methodist Hospital |                                          | Investigator/study personnel enrolling site SWIFT PRIME | HERMES collaborators                                                                       |
| G.                                | Eubank      |                       |                  | Health Research Institute / Riverside Methodist Hospital |                                          | Investigator/study personnel enrolling site SWIFT PRIME | HERMES collaborators                                                                       |
| W.J.                              | Hicks       |                       |                  | Health Research Institute / Riverside Methodist Hospital |                                          | Investigator/study personnel enrolling site SWIFT PRIME | HERMES collaborators                                                                       |
| P.                                | Pema        |                       |                  | Health Research Institute / Riverside Methodist Hospital |                                          | Investigator/study personnel enrolling site SWIFT PRIME | HERMES collaborators                                                                       |
| N.                                | Vora        |                       |                  | Health Research Institute / Riverside Methodist Hospital |                                          | Investigator/study personnel enrolling site SWIFT PRIME | HERMES collaborators                                                                       |
| J.                                | Mejilla     |                       |                  | Health Research Institute / Riverside Methodist Hospital |                                          | Investigator/study personnel enrolling site SWIFT PRIME | HERMES collaborators                                                                       |
| M.                                | Taylor      |                       |                  | Health Research Institute / Riverside Methodist Hospital |                                          | Investigator/study personnel enrolling site SWIFT PRIME | HERMES collaborators                                                                       |



## Supplemental Online Content: Nonauthor Collaborators

\*First name, last name, and suffix (if applicable) are required and will appear in PubMed.

| *First Name and Middle Initial(s) | *Last Name  | *Suffix (eg, Jr, III) | Academic Degrees | Institution                          | Location (city, state/province, country) | Role or Contribution, eg, chair, principal investigator | Group (if more than 1 Group listed in the byline) and/or Subgroup (eg, Steering Committee) |
|-----------------------------------|-------------|-----------------------|------------------|--------------------------------------|------------------------------------------|---------------------------------------------------------|--------------------------------------------------------------------------------------------|
| W.                                | Clark       |                       |                  | Oregon Health and Science University |                                          | PI enrolling site SWIFT PRIME                           | HERMES collaborators                                                                       |
| A.                                | Rontal      |                       |                  | Oregon Health and Science University |                                          | Investigator/study personnel enrolling site SWIFT PRIME | HERMES collaborators                                                                       |
| J.                                | Fields      |                       |                  | Oregon Health and Science University |                                          | Investigator/study personnel enrolling site SWIFT PRIME | HERMES collaborators                                                                       |
| B.                                | Peterson    |                       |                  | Oregon Health and Science University |                                          | Investigator/study personnel enrolling site SWIFT PRIME | HERMES collaborators                                                                       |
| G.                                | Nesbit      |                       |                  | Oregon Health and Science University |                                          | Investigator/study personnel enrolling site SWIFT PRIME | HERMES collaborators                                                                       |
| H.                                | Lutsep      |                       |                  | Oregon Health and Science University |                                          | Investigator/study personnel enrolling site SWIFT PRIME | HERMES collaborators                                                                       |
| H.                                | Bozorgchami |                       |                  | Oregon Health and Science University |                                          | Investigator/study personnel enrolling site SWIFT PRIME | HERMES collaborators                                                                       |
| R.                                | Priest      |                       |                  | Oregon Health and Science University |                                          | Investigator/study personnel enrolling site SWIFT PRIME | HERMES collaborators                                                                       |
| O.                                | Ologuntoye  |                       |                  | Oregon Health and Science University |                                          | Investigator/study personnel enrolling site SWIFT PRIME | HERMES collaborators                                                                       |
| S.                                | Barnwell    |                       |                  | Oregon Health and Science University |                                          | Investigator/study personnel enrolling site SWIFT PRIME | HERMES collaborators                                                                       |
| A.                                | Dogan       |                       |                  | Oregon Health and Science University |                                          | Investigator/study personnel enrolling site SWIFT PRIME | HERMES collaborators                                                                       |

## Supplemental Online Content: Nonauthor Collaborators

\*First name, last name, and suffix (if applicable) are required and will appear in PubMed.

| *First Name and Middle Initial(s) | *Last Name | *Suffix (eg, Jr, III) | Academic Degrees | Institution                             | Location (city, state/province, country) | Role or Contribution, eg, chair, principal investigator | Group (if more than 1 Group listed in the byline) and/or Subgroup (eg, Steering Committee) |
|-----------------------------------|------------|-----------------------|------------------|-----------------------------------------|------------------------------------------|---------------------------------------------------------|--------------------------------------------------------------------------------------------|
| K.                                | Herrick    |                       |                  | Oregon Health and Science University    |                                          | Investigator/study personnel enrolling site SWIFT PRIME | HERMES collaborators                                                                       |
| C.                                | Takahasi   |                       |                  | Oregon Health and Science University    |                                          | Investigator/study personnel enrolling site SWIFT PRIME | HERMES collaborators                                                                       |
| N.                                | Beadell    |                       |                  | Oregon Health and Science University    |                                          | Investigator/study personnel enrolling site SWIFT PRIME | HERMES collaborators                                                                       |
| B.                                | Brown      |                       |                  | Oregon Health and Science University    |                                          | Investigator/study personnel enrolling site SWIFT PRIME | HERMES collaborators                                                                       |
| S.                                | Jamieson   |                       |                  | Oregon Health and Science University    |                                          | Investigator/study personnel enrolling site SWIFT PRIME | HERMES collaborators                                                                       |
| M.S.                              | Hussain    |                       |                  | Cleveland Clinic Cerebrovascular Center |                                          | PI enrolling site SWIFT PRIME                           | HERMES collaborators                                                                       |
| A.                                | Russman    |                       |                  | Cleveland Clinic Cerebrovascular Center |                                          | Investigator/study personnel enrolling site SWIFT PRIME | HERMES collaborators                                                                       |
| F.                                | Hui        |                       |                  | Cleveland Clinic Cerebrovascular Center |                                          | Investigator/study personnel enrolling site SWIFT PRIME | HERMES collaborators                                                                       |
| D.                                | Wisco      |                       |                  | Cleveland Clinic Cerebrovascular Center |                                          | Investigator/study personnel enrolling site SWIFT PRIME | HERMES collaborators                                                                       |
| K.                                | Uchino     |                       |                  | Cleveland Clinic Cerebrovascular Center |                                          | Investigator/study personnel enrolling site SWIFT PRIME | HERMES collaborators                                                                       |
| Z.                                | Khawaja    |                       |                  | Cleveland Clinic Cerebrovascular Center |                                          | Investigator/study personnel enrolling site SWIFT PRIME | HERMES collaborators                                                                       |

## Supplemental Online Content: Nonauthor Collaborators

\*First name, last name, and suffix (if applicable) are required and will appear in PubMed.

| *First Name and Middle Initial(s) | *Last Name  | *Suffix (eg, Jr, III) | Academic Degrees | Institution                             | Location (city, state/province, country) | Role or Contribution, eg, chair, principal investigator | Group (if more than 1 Group listed in the byline) and/or Subgroup (eg, Steering Committee) |
|-----------------------------------|-------------|-----------------------|------------------|-----------------------------------------|------------------------------------------|---------------------------------------------------------|--------------------------------------------------------------------------------------------|
| I.                                | Katzen      |                       |                  | Cleveland Clinic Cerebrovascular Center |                                          | Investigator/study personnel enrolling site SWIFT PRIME | HERMES collaborators                                                                       |
| G.                                | Toth        |                       |                  | Cleveland Clinic Cerebrovascular Center |                                          | Investigator/study personnel enrolling site SWIFT PRIME | HERMES collaborators                                                                       |
| E.                                | Cheng-Ching |                       |                  | Cleveland Clinic Cerebrovascular Center |                                          | Investigator/study personnel enrolling site SWIFT PRIME | HERMES collaborators                                                                       |
| M.                                | Bain        |                       |                  | Cleveland Clinic Cerebrovascular Center |                                          | Investigator/study personnel enrolling site SWIFT PRIME | HERMES collaborators                                                                       |
| S.                                | Man         |                       |                  | Cleveland Clinic Cerebrovascular Center |                                          | Investigator/study personnel enrolling site SWIFT PRIME | HERMES collaborators                                                                       |
| A.                                | Farrag      |                       |                  | Cleveland Clinic Cerebrovascular Center |                                          | Investigator/study personnel enrolling site SWIFT PRIME | HERMES collaborators                                                                       |
| P.                                | George      |                       |                  | Cleveland Clinic Cerebrovascular Center |                                          | Investigator/study personnel enrolling site SWIFT PRIME | HERMES collaborators                                                                       |
| S.                                | John        |                       |                  | Cleveland Clinic Cerebrovascular Center |                                          | Investigator/study personnel enrolling site SWIFT PRIME | HERMES collaborators                                                                       |
| L.                                | Shankar     |                       |                  | Cleveland Clinic Cerebrovascular Center |                                          | Investigator/study personnel enrolling site SWIFT PRIME | HERMES collaborators                                                                       |
| A.                                | Drofa       |                       |                  | Cleveland Clinic Cerebrovascular Center |                                          | Investigator/study personnel enrolling site SWIFT PRIME | HERMES collaborators                                                                       |

## Supplemental Online Content: Nonauthor Collaborators

\*First name, last name, and suffix (if applicable) are required and will appear in PubMed.

| *First Name and Middle Initial(s) | *Last Name  | *Suffix (eg, Jr, III) | Academic Degrees | Institution                                                                                                | Location (city, state/province, country) | Role or Contribution, eg, chair, principal investigator | Group (if more than 1 Group listed in the byline) and/or Subgroup (eg, Steering Committee) |
|-----------------------------------|-------------|-----------------------|------------------|------------------------------------------------------------------------------------------------------------|------------------------------------------|---------------------------------------------------------|--------------------------------------------------------------------------------------------|
| R.                                | Dahlgren    |                       |                  | Cleveland Clinic Cerebrovascular Center                                                                    |                                          | Investigator/study personnel enrolling site SWIFT PRIME | HERMES collaborators                                                                       |
| A.                                | Bauer       |                       |                  | Cleveland Clinic Cerebrovascular Center                                                                    |                                          | Investigator/study personnel enrolling site SWIFT PRIME | HERMES collaborators                                                                       |
| A.                                | Itreat      |                       |                  | Cleveland Clinic Cerebrovascular Center                                                                    |                                          | Investigator/study personnel enrolling site SWIFT PRIME | HERMES collaborators                                                                       |
| A.                                | Taqui       |                       |                  | Cleveland Clinic Cerebrovascular Center                                                                    |                                          | Investigator/study personnel enrolling site SWIFT PRIME | HERMES collaborators                                                                       |
| P.                                | Ringleb     |                       |                  | Universitätsklinikum Heidelberg/<br>Neurologische Klinik und Poliklinik<br>Universitätsklinikum Heidelberg |                                          | PI enrolling site SWIFT PRIME                           | HERMES collaborators                                                                       |
| M.                                | Bendszus    |                       |                  | Universitätsklinikum Heidelberg/<br>Neurologische Klinik und Poliklinik<br>Universitätsklinikum Heidelberg |                                          | Investigator/study personnel enrolling site SWIFT PRIME | HERMES collaborators                                                                       |
| M.                                | Möhlenbruch |                       |                  | Universitätsklinikum Heidelberg/<br>Neurologische Klinik und Poliklinik<br>Universitätsklinikum Heidelberg |                                          | Investigator/study personnel enrolling site SWIFT PRIME | HERMES collaborators                                                                       |
| T.                                | Reiff       |                       |                  | Universitätsklinikum Heidelberg/<br>Neurologische Klinik und Poliklinik<br>Universitätsklinikum Heidelberg |                                          | Investigator/study personnel enrolling site SWIFT PRIME | HERMES collaborators                                                                       |

## Supplemental Online Content: Nonauthor Collaborators

\*First name, last name, and suffix (if applicable) are required and will appear in PubMed.

| *First Name and Middle Initial(s) | *Last Name | *Suffix (eg, Jr, III) | Academic Degrees | Institution                                                                                                | Location (city, state/province, country) | Role or Contribution, eg, chair, principal investigator    | Group (if more than 1 Group listed in the byline) and/or Subgroup (eg, Steering Committee) |
|-----------------------------------|------------|-----------------------|------------------|------------------------------------------------------------------------------------------------------------|------------------------------------------|------------------------------------------------------------|--------------------------------------------------------------------------------------------|
| H.                                | Amiri      |                       |                  | Universitätsklinikum Heidelberg/<br>Neurologische Klinik und Poliklinik<br>Universitätsklinikum Heidelberg |                                          | Investigator/study personnel<br>enrolling site SWIFT PRIME | HERMES collaborators                                                                       |
| J.                                | Purrucker  |                       |                  | Universitätsklinikum Heidelberg/<br>Neurologische Klinik und Poliklinik<br>Universitätsklinikum Heidelberg |                                          | Investigator/study personnel<br>enrolling site SWIFT PRIME | HERMES collaborators                                                                       |
| C.                                | Herweh     |                       |                  | Universitätsklinikum Heidelberg/<br>Neurologische Klinik und Poliklinik<br>Universitätsklinikum Heidelberg |                                          | Investigator/study personnel<br>enrolling site SWIFT PRIME | HERMES collaborators                                                                       |
| M.                                | Pham       |                       |                  | Universitätsklinikum Heidelberg/<br>Neurologische Klinik und Poliklinik<br>Universitätsklinikum Heidelberg |                                          | Investigator/study personnel<br>enrolling site SWIFT PRIME | HERMES collaborators                                                                       |
| O.                                | Menn       |                       |                  | Universitätsklinikum Heidelberg/<br>Neurologische Klinik und Poliklinik<br>Universitätsklinikum Heidelberg |                                          | Investigator/study personnel<br>enrolling site SWIFT PRIME | HERMES collaborators                                                                       |
| I.                                | Ludwig     |                       |                  | Universitätsklinikum Heidelberg/<br>Neurologische Klinik und Poliklinik<br>Universitätsklinikum Heidelberg |                                          | Investigator/study personnel<br>enrolling site SWIFT PRIME | HERMES collaborators                                                                       |
| I.                                | Acosta     |                       |                  | Florida Hospital                                                                                           |                                          | PI enrolling site SWIFT PRIME                              | HERMES collaborators                                                                       |

## Supplemental Online Content: Nonauthor Collaborators

\*First name, last name, and suffix (if applicable) are required and will appear in PubMed.

| *First Name and Middle Initial(s) | *Last Name | *Suffix (eg, Jr, III) | Academic Degrees | Institution          | Location (city, state/province, country) | Role or Contribution, eg, chair, principal investigator | Group (if more than 1 Group listed in the byline) and/or Subgroup (eg, Steering Committee) |
|-----------------------------------|------------|-----------------------|------------------|----------------------|------------------------------------------|---------------------------------------------------------|--------------------------------------------------------------------------------------------|
| C.                                | Villar     |                       |                  | Florida Hospital     |                                          | Investigator/study personnel enrolling site SWIFT PRIME | HERMES collaborators                                                                       |
| W.                                | Morgan     |                       |                  | Florida Hospital     |                                          | Investigator/study personnel enrolling site SWIFT PRIME | HERMES collaborators                                                                       |
| C.                                | Sombutmai  |                       |                  | Florida Hospital     |                                          | Investigator/study personnel enrolling site SWIFT PRIME | HERMES collaborators                                                                       |
| F.                                | Hellinger  |                       |                  | Florida Hospital     |                                          | Investigator/study personnel enrolling site SWIFT PRIME | HERMES collaborators                                                                       |
| E.                                | Allen      |                       |                  | Florida Hospital     |                                          | Investigator/study personnel enrolling site SWIFT PRIME | HERMES collaborators                                                                       |
| M.                                | Bellew     |                       |                  | Florida Hospital     |                                          | Investigator/study personnel enrolling site SWIFT PRIME | HERMES collaborators                                                                       |
| R.                                | Ghandi     |                       |                  | Florida Hospital     |                                          | Investigator/study personnel enrolling site SWIFT PRIME | HERMES collaborators                                                                       |
| E.                                | Bonwit     |                       |                  | Florida Hospital     |                                          | Investigator/study personnel enrolling site SWIFT PRIME | HERMES collaborators                                                                       |
| J.                                | Aly        |                       |                  | Florida Hospital     |                                          | Investigator/study personnel enrolling site SWIFT PRIME | HERMES collaborators                                                                       |
| R.D.                              | Ecker      |                       |                  | Maine Medical Center |                                          | PI enrolling site SWIFT PRIME                           | HERMES collaborators                                                                       |
| D.                                | Seder      |                       |                  | Maine Medical Center |                                          | Investigator/study personnel enrolling site SWIFT PRIME | HERMES collaborators                                                                       |

## Supplemental Online Content: Nonauthor Collaborators

\*First name, last name, and suffix (if applicable) are required and will appear in PubMed.

| *First Name and Middle Initial(s) | *Last Name   | *Suffix (eg, Jr, III) | Academic Degrees | Institution           | Location (city, state/province, country) | Role or Contribution, eg, chair, principal investigator | Group (if more than 1 Group listed in the byline) and/or Subgroup (eg, Steering Committee) |
|-----------------------------------|--------------|-----------------------|------------------|-----------------------|------------------------------------------|---------------------------------------------------------|--------------------------------------------------------------------------------------------|
| J.                                | Morris       |                       |                  | Maine Medical Center  |                                          | Investigator/study personnel enrolling site SWIFT PRIME | HERMES collaborators                                                                       |
| M.                                | Skaletsky    |                       |                  | Maine Medical Center  |                                          | Investigator/study personnel enrolling site SWIFT PRIME | HERMES collaborators                                                                       |
| J.                                | Belden       |                       |                  | Maine Medical Center  |                                          | Investigator/study personnel enrolling site SWIFT PRIME | HERMES collaborators                                                                       |
| C.                                | Baker        |                       |                  | Maine Medical Center  |                                          | Investigator/study personnel enrolling site SWIFT PRIME | HERMES collaborators                                                                       |
| L.S.                              | Connolly     |                       |                  | Maine Medical Center  |                                          | Investigator/study personnel enrolling site SWIFT PRIME | HERMES collaborators                                                                       |
| P.                                | Papanagiotou |                       |                  | Klinikum Bremen-Mitte |                                          | PI enrolling site SWIFT PRIME                           | HERMES collaborators                                                                       |
| C.                                | Roth         |                       |                  | Klinikum Bremen-Mitte |                                          | Investigator/study personnel enrolling site SWIFT PRIME | HERMES collaborators                                                                       |
| A.                                | Kastrup      |                       |                  | Klinikum Bremen-Mitte |                                          | Investigator/study personnel enrolling site SWIFT PRIME | HERMES collaborators                                                                       |
| M.                                | Politi       |                       |                  | Klinikum Bremen-Mitte |                                          | Investigator/study personnel enrolling site SWIFT PRIME | HERMES collaborators                                                                       |
| F.                                | Brunner      |                       |                  | Klinikum Bremen-Mitte |                                          | Investigator/study personnel enrolling site SWIFT PRIME | HERMES collaborators                                                                       |
| M.                                | Alexandrou   |                       |                  | Klinikum Bremen-Mitte |                                          | Investigator/study personnel enrolling site SWIFT PRIME | HERMES collaborators                                                                       |

## Supplemental Online Content: Nonauthor Collaborators

\*First name, last name, and suffix (if applicable) are required and will appear in PubMed.

| *First Name and Middle Initial(s) | *Last Name | *Suffix (eg, Jr, III) | Academic Degrees | Institution                          | Location (city, state/province, country) | Role or Contribution, eg, chair, principal investigator | Group (if more than 1 Group listed in the byline) and/or Subgroup (eg, Steering Committee) |
|-----------------------------------|------------|-----------------------|------------------|--------------------------------------|------------------------------------------|---------------------------------------------------------|--------------------------------------------------------------------------------------------|
| H.                                | Merdivan   |                       |                  | Klinikum Bremen-Mitte                |                                          | Investigator/study personnel enrolling site SWIFT PRIME | HERMES collaborators                                                                       |
| C.                                | Ramsey     |                       |                  | Baptist Health Lexington             |                                          | PI enrolling site SWIFT PRIME                           | HERMES collaborators                                                                       |
| C.                                | Given      | II                    |                  | Baptist Health Lexington             |                                          | Investigator/study personnel enrolling site SWIFT PRIME | HERMES collaborators                                                                       |
| S.                                | Renfrow    |                       |                  | Baptist Health Lexington             |                                          | Investigator/study personnel enrolling site SWIFT PRIME | HERMES collaborators                                                                       |
| V.                                | Deshmukh   |                       |                  | Providence Brain and Spine Institute |                                          | PI enrolling site SWIFT PRIME                           | HERMES collaborators                                                                       |
| S.                                | Sasadeusz  |                       |                  | Providence Brain and Spine Institute |                                          | Investigator/study personnel enrolling site SWIFT PRIME | HERMES collaborators                                                                       |
| F.                                | Vincent    |                       |                  | Providence Brain and Spine Institute |                                          | Investigator/study personnel enrolling site SWIFT PRIME | HERMES collaborators                                                                       |
| J.T.                              | Thiesing   |                       |                  | Providence Brain and Spine Institute |                                          | Investigator/study personnel enrolling site SWIFT PRIME | HERMES collaborators                                                                       |
| J.                                | Putnam     |                       |                  | Providence Brain and Spine Institute |                                          | Investigator/study personnel enrolling site SWIFT PRIME | HERMES collaborators                                                                       |
| A.                                | Bhatt      |                       |                  | Providence Brain and Spine Institute |                                          | Investigator/study personnel enrolling site SWIFT PRIME | HERMES collaborators                                                                       |
| A.                                | Kansara    |                       |                  | Providence Brain and Spine Institute |                                          | Investigator/study personnel enrolling site SWIFT PRIME | HERMES collaborators                                                                       |



## Supplemental Online Content: Nonauthor Collaborators

\*First name, last name, and suffix (if applicable) are required and will appear in PubMed.

| *First Name and Middle Initial(s) | *Last Name    | *Suffix (eg, Jr, III) | Academic Degrees | Institution                          | Location (city, state/province, country) | Role or Contribution, eg, chair, principal investigator | Group (if more than 1 Group listed in the byline) and/or Subgroup (eg, Steering Committee) |
|-----------------------------------|---------------|-----------------------|------------------|--------------------------------------|------------------------------------------|---------------------------------------------------------|--------------------------------------------------------------------------------------------|
| D.                                | Cacaves       |                       |                  | Providence Brain and Spine Institute |                                          | Investigator/study personnel enrolling site SWIFT PRIME | HERMES collaborators                                                                       |
| T.                                | Lowenkopf     |                       |                  | Providence Brain and Spine Institute |                                          | Investigator/study personnel enrolling site SWIFT PRIME | HERMES collaborators                                                                       |
| L.                                | Yanase        |                       |                  | Providence Brain and Spine Institute |                                          | Investigator/study personnel enrolling site SWIFT PRIME | HERMES collaborators                                                                       |
| J.                                | Zurasky       |                       |                  | Providence Brain and Spine Institute |                                          | Investigator/study personnel enrolling site SWIFT PRIME | HERMES collaborators                                                                       |
| S.                                | Dancer        |                       |                  | Providence Brain and Spine Institute |                                          | Investigator/study personnel enrolling site SWIFT PRIME | HERMES collaborators                                                                       |
| B.                                | Freeman       |                       |                  | Providence Brain and Spine Institute |                                          | Investigator/study personnel enrolling site SWIFT PRIME | HERMES collaborators                                                                       |
| T.                                | Scheibe-Mirek |                       |                  | Providence Brain and Spine Institute |                                          | Investigator/study personnel enrolling site SWIFT PRIME | HERMES collaborators                                                                       |
| J.                                | Robison       |                       |                  | Providence Brain and Spine Institute |                                          | Investigator/study personnel enrolling site SWIFT PRIME | HERMES collaborators                                                                       |
| A.                                | Rontal        |                       |                  | Providence Brain and Spine Institute |                                          | Investigator/study personnel enrolling site SWIFT PRIME | HERMES collaborators                                                                       |
| J.                                | Roll          |                       |                  | Providence Brain and Spine Institute |                                          | Investigator/study personnel enrolling site SWIFT PRIME | HERMES collaborators                                                                       |

## Supplemental Online Content: Nonauthor Collaborators

\*First name, last name, and suffix (if applicable) are required and will appear in PubMed.

| *First Name and Middle Initial(s) | *Last Name     | *Suffix (eg, Jr, III) | Academic Degrees | Institution                                            | Location (city, state/province, country) | Role or Contribution, eg, chair, principal investigator | Group (if more than 1 Group listed in the byline) and/or Subgroup (eg, Steering Committee) |
|-----------------------------------|----------------|-----------------------|------------------|--------------------------------------------------------|------------------------------------------|---------------------------------------------------------|--------------------------------------------------------------------------------------------|
| D.                                | Clark          |                       |                  | Providence Brain and Spine Institute                   |                                          | Investigator/study personnel enrolling site SWIFT PRIME | HERMES collaborators                                                                       |
| M.                                | Rodriguez      |                       |                  | Providence Brain and Spine Institute                   |                                          | Investigator/study personnel enrolling site SWIFT PRIME | HERMES collaborators                                                                       |
| B-F.M.                            | Fitzsimmons    |                       |                  | Medical College of Wisconsin / Froedtert Hospital West |                                          | PI enrolling site SWIFT PRIME                           | HERMES collaborators                                                                       |
| O.                                | Zaidat         |                       |                  | Medical College of Wisconsin / Froedtert Hospital West |                                          | Investigator/study personnel enrolling site SWIFT PRIME | HERMES collaborators                                                                       |
| J.R.                              | Lynch          |                       |                  | Medical College of Wisconsin / Froedtert Hospital West |                                          | Investigator/study personnel enrolling site SWIFT PRIME | HERMES collaborators                                                                       |
| M.                                | Lazzaro        |                       |                  | Medical College of Wisconsin / Froedtert Hospital West |                                          | Investigator/study personnel enrolling site SWIFT PRIME | HERMES collaborators                                                                       |
| T.                                | Larson         |                       |                  | Medical College of Wisconsin / Froedtert Hospital West |                                          | Investigator/study personnel enrolling site SWIFT PRIME | HERMES collaborators                                                                       |
| L.                                | Padmore        |                       |                  | Medical College of Wisconsin / Froedtert Hospital West |                                          | Investigator/study personnel enrolling site SWIFT PRIME | HERMES collaborators                                                                       |
| E.                                | Das            |                       |                  | Medical College of Wisconsin / Froedtert Hospital West |                                          | Investigator/study personnel enrolling site SWIFT PRIME | HERMES collaborators                                                                       |
| A.                                | Farrow-Schmidt |                       |                  | Medical College of Wisconsin / Froedtert Hospital West |                                          | Investigator/study personnel enrolling site SWIFT PRIME | HERMES collaborators                                                                       |
| A.                                | Hassan         |                       |                  | Valley Baptist Medical Center-Harlingen                |                                          | PI enrolling site SWIFT PRIME                           | HERMES collaborators                                                                       |

## Supplemental Online Content: Nonauthor Collaborators

\*First name, last name, and suffix (if applicable) are required and will appear in PubMed.

| *First Name and Middle Initial(s) | *Last Name | *Suffix (eg, Jr, III) | Academic Degrees | Institution                             | Location (city, state/province, country) | Role or Contribution, eg, chair, principal investigator | Group (if more than 1 Group listed in the byline) and/or Subgroup (eg, Steering Committee) |
|-----------------------------------|------------|-----------------------|------------------|-----------------------------------------|------------------------------------------|---------------------------------------------------------|--------------------------------------------------------------------------------------------|
| W.                                | Tekle      |                       |                  | Valley Baptist Medical Center-Harlingen |                                          | Investigator/study personnel enrolling site SWIFT PRIME | HERMES collaborators                                                                       |
| C.                                | Cate       |                       |                  | Valley Baptist Medical Center-Harlingen |                                          | Investigator/study personnel enrolling site SWIFT PRIME | HERMES collaborators                                                                       |
| C.                                | Cnyrim     |                       |                  | Universitätsklinikum Kiel               |                                          | Investigator/study personnel enrolling site SWIFT PRIME | HERMES collaborators                                                                       |
| F.                                | Wodarg     |                       |                  | Universitätsklinikum Kiel               |                                          | Investigator/study personnel enrolling site SWIFT PRIME | HERMES collaborators                                                                       |
| C.                                | Wiese      |                       |                  | Universitätsklinikum Kiel               |                                          | Investigator/study personnel enrolling site SWIFT PRIME | HERMES collaborators                                                                       |
| A.                                | Binder     |                       |                  | Universitätsklinikum Kiel               |                                          | Investigator/study personnel enrolling site SWIFT PRIME | HERMES collaborators                                                                       |
| C.                                | Riedel     |                       |                  | Universitätsklinikum Kiel               |                                          | Investigator/study personnel enrolling site SWIFT PRIME | HERMES collaborators                                                                       |
| A.                                | Rohr       |                       |                  | Universitätsklinikum Kiel               |                                          | Investigator/study personnel enrolling site SWIFT PRIME | HERMES collaborators                                                                       |
| N.                                | Lang       |                       |                  | Universitätsklinikum Kiel               |                                          | Investigator/study personnel enrolling site SWIFT PRIME | HERMES collaborators                                                                       |
| H.                                | Laufs      |                       |                  | Universitätsklinikum Kiel               |                                          | Investigator/study personnel enrolling site SWIFT PRIME | HERMES collaborators                                                                       |

## Supplemental Online Content: Nonauthor Collaborators

\*First name, last name, and suffix (if applicable) are required and will appear in PubMed.

| *First Name and Middle Initial(s) | *Last Name | *Suffix (eg, Jr, III) | Academic Degrees | Institution               | Location (city, state/province, country) | Role or Contribution, eg, chair, principal investigator | Group (if more than 1 Group listed in the byline) and/or Subgroup (eg, Steering Committee) |
|-----------------------------------|------------|-----------------------|------------------|---------------------------|------------------------------------------|---------------------------------------------------------|--------------------------------------------------------------------------------------------|
| S.                                | Krieter    |                       |                  | Universitätsklinikum Kiel |                                          | Investigator/study personnel enrolling site SWIFT PRIME | HERMES collaborators                                                                       |
| L.                                | Remonda    |                       |                  | Kantonsspital Aarau       |                                          | PI enrolling site SWIFT PRIME                           | HERMES collaborators                                                                       |
| M.                                | Diepers    |                       |                  | Kantonsspital Aarau       |                                          | Investigator/study personnel enrolling site SWIFT PRIME | HERMES collaborators                                                                       |
| J.                                | Añon       |                       |                  | Kantonsspital Aarau       |                                          | Investigator/study personnel enrolling site SWIFT PRIME | HERMES collaborators                                                                       |
| K.                                | Nedeltchev |                       |                  | Kantonsspital Aarau       |                                          | Investigator/study personnel enrolling site SWIFT PRIME | HERMES collaborators                                                                       |
| T.                                | Kahles     |                       |                  | Kantonsspital Aarau       |                                          | Investigator/study personnel enrolling site SWIFT PRIME | HERMES collaborators                                                                       |
| S.                                | Biethahn   |                       |                  | Kantonsspital Aarau       |                                          | Investigator/study personnel enrolling site SWIFT PRIME | HERMES collaborators                                                                       |
| M.                                | Lindner    |                       |                  | Kantonsspital Aarau       |                                          | Investigator/study personnel enrolling site SWIFT PRIME | HERMES collaborators                                                                       |
| V.                                | Chang      |                       |                  | Kantonsspital Aarau       |                                          | Investigator/study personnel enrolling site SWIFT PRIME | HERMES collaborators                                                                       |
| C.                                | Gächter    |                       |                  | Kantonsspital Aarau       |                                          | Investigator/study personnel enrolling site SWIFT PRIME | HERMES collaborators                                                                       |
| C.                                | Esperon    |                       |                  | Kantonsspital Aarau       |                                          | Investigator/study personnel enrolling site SWIFT PRIME | HERMES collaborators                                                                       |

## Supplemental Online Content: Nonauthor Collaborators

\*First name, last name, and suffix (if applicable) are required and will appear in PubMed.

| *First Name and Middle Initial(s) | *Last Name        | *Suffix (eg, Jr, III) | Academic Degrees | Institution                                  | Location (city, state/province, country) | Role or Contribution, eg, chair, principal investigator | Group (if more than 1 Group listed in the byline) and/or Subgroup (eg, Steering Committee) |
|-----------------------------------|-------------------|-----------------------|------------------|----------------------------------------------|------------------------------------------|---------------------------------------------------------|--------------------------------------------------------------------------------------------|
| M.                                | Guglielmetti      |                       |                  | Kantonsspital Aarau                          |                                          | Investigator/study personnel enrolling site SWIFT PRIME | HERMES collaborators                                                                       |
| J.F.                              | Arenillas Lara    |                       |                  | Hospital Clinico Universitario de Valladolid |                                          | PI enrolling site SWIFT PRIME                           | HERMES collaborators                                                                       |
| M.                                | Martínez Galdámez |                       |                  | Hospital Clinico Universitario de Valladolid |                                          | Investigator/study personnel enrolling site SWIFT PRIME | HERMES collaborators                                                                       |
| A.I.                              | Calleja Sanz      |                       |                  | Hospital Clinico Universitario de Valladolid |                                          | Investigator/study personnel enrolling site SWIFT PRIME | HERMES collaborators                                                                       |
| E.                                | Cortijo Garcia    |                       |                  | Hospital Clinico Universitario de Valladolid |                                          | Investigator/study personnel enrolling site SWIFT PRIME | HERMES collaborators                                                                       |
| P.                                | Garcia Bermejo    |                       |                  | Hospital Clinico Universitario de Valladolid |                                          | Investigator/study personnel enrolling site SWIFT PRIME | HERMES collaborators                                                                       |
| S.                                | Perez             |                       |                  | Hospital Clinico Universitario de Valladolid |                                          | Investigator/study personnel enrolling site SWIFT PRIME | HERMES collaborators                                                                       |
| P.                                | Mulero Carrillo   |                       |                  | Hospital Clinico Universitario de Valladolid |                                          | Investigator/study personnel enrolling site SWIFT PRIME | HERMES collaborators                                                                       |
| E.                                | Crespo Vallejo    |                       |                  | Hospital Clinico Universitario de Valladolid |                                          | Investigator/study personnel enrolling site SWIFT PRIME | HERMES collaborators                                                                       |
| M.                                | Ruiz Piñero       |                       |                  | Hospital Clinico Universitario de Valladolid |                                          | Investigator/study personnel enrolling site SWIFT PRIME | HERMES collaborators                                                                       |
| L.                                | Lopez Mesonero    |                       |                  | Hospital Clinico Universitario de Valladolid |                                          | Investigator/study personnel enrolling site SWIFT PRIME | HERMES collaborators                                                                       |

## Supplemental Online Content: Nonauthor Collaborators

\*First name, last name, and suffix (if applicable) are required and will appear in PubMed.

| *First Name and Middle Initial(s) | *Last Name  | *Suffix (eg, Jr, III) | Academic Degrees | Institution                                  | Location (city, state/province, country) | Role or Contribution, eg, chair, principal investigator | Group (if more than 1 Group listed in the byline) and/or Subgroup (eg, Steering Committee) |
|-----------------------------------|-------------|-----------------------|------------------|----------------------------------------------|------------------------------------------|---------------------------------------------------------|--------------------------------------------------------------------------------------------|
| F.J.                              | Reyes Muñoz |                       |                  | Hospital Clinico Universitario de Valladolid |                                          | Investigator/study personnel enrolling site SWIFT PRIME | HERMES collaborators                                                                       |
| C.                                | Brekenfeld  |                       |                  | Universitätsklinikum Hamburg-Eppendorf       |                                          | PI enrolling site SWIFT PRIME                           | HERMES collaborators                                                                       |
| J-H.                              | Buhk        |                       |                  | Universitätsklinikum Hamburg-Eppendorf       |                                          | Investigator/study personnel enrolling site SWIFT PRIME | HERMES collaborators                                                                       |
| A.                                | Krützelmann |                       |                  | Universitätsklinikum Hamburg-Eppendorf       |                                          | Investigator/study personnel enrolling site SWIFT PRIME | HERMES collaborators                                                                       |
| G.                                | Thomalla    |                       |                  | Universitätsklinikum Hamburg-Eppendorf       |                                          | Investigator/study personnel enrolling site SWIFT PRIME | HERMES collaborators                                                                       |
| B.                                | Cheng-Ching |                       |                  | Universitätsklinikum Hamburg-Eppendorf       |                                          | Investigator/study personnel enrolling site SWIFT PRIME | HERMES collaborators                                                                       |
| C.                                | Becker      |                       |                  | Universitätsklinikum Hamburg-Eppendorf       |                                          | Investigator/study personnel enrolling site SWIFT PRIME | HERMES collaborators                                                                       |
| J.                                | Hoppe       |                       |                  | Universitätsklinikum Hamburg-Eppendorf       |                                          | Investigator/study personnel enrolling site SWIFT PRIME | HERMES collaborators                                                                       |
| E.                                | Goebell     |                       |                  | Universitätsklinikum Hamburg-Eppendorf       |                                          | Investigator/study personnel enrolling site SWIFT PRIME | HERMES collaborators                                                                       |
| B.                                | Holst       |                       |                  | Universitätsklinikum Hamburg-Eppendorf       |                                          | Investigator/study personnel enrolling site SWIFT PRIME | HERMES collaborators                                                                       |
| U.                                | Gryzka      |                       |                  | Universitätsklinikum Hamburg-Eppendorf       |                                          | Investigator/study personnel enrolling site SWIFT PRIME | HERMES collaborators                                                                       |

## Supplemental Online Content: Nonauthor Collaborators

\*First name, last name, and suffix (if applicable) are required and will appear in PubMed.

| *First Name and Middle Initial(s) | *Last Name | *Suffix (eg, Jr, III) | Academic Degrees | Institution                              | Location (city, state/province, country) | Role or Contribution, eg, chair, principal investigator | Group (if more than 1 Group listed in the byline) and/or Subgroup (eg, Steering Committee) |
|-----------------------------------|------------|-----------------------|------------------|------------------------------------------|------------------------------------------|---------------------------------------------------------|--------------------------------------------------------------------------------------------|
| G.                                | Wortmann   |                       |                  | Universitätsklinikum Hamburg-Eppendorf   |                                          | Investigator/study personnel enrolling site SWIFT PRIME | HERMES collaborators                                                                       |
| S.                                | Starkman   |                       |                  | UCLA / Ronald Reagan UCLA Medical Center |                                          | PI enrolling site SWIFT PRIME                           | HERMES collaborators                                                                       |
| G.                                | Duckwiler  |                       |                  | UCLA / Ronald Reagan UCLA Medical Center |                                          | Investigator/study personnel enrolling site SWIFT PRIME | HERMES collaborators                                                                       |
| N.                                | Rao        |                       |                  | UCLA / Ronald Reagan UCLA Medical Center |                                          | Investigator/study personnel enrolling site SWIFT PRIME | HERMES collaborators                                                                       |
| S.                                | Sheth      |                       |                  | UCLA / Ronald Reagan UCLA Medical Center |                                          | Investigator/study personnel enrolling site SWIFT PRIME | HERMES collaborators                                                                       |
| K.                                | Ng         |                       |                  | UCLA / Ronald Reagan UCLA Medical Center |                                          | Investigator/study personnel enrolling site SWIFT PRIME | HERMES collaborators                                                                       |
| A.                                | Noorian    |                       |                  | UCLA / Ronald Reagan UCLA Medical Center |                                          | Investigator/study personnel enrolling site SWIFT PRIME | HERMES collaborators                                                                       |
| V.                                | Szeder     |                       |                  | UCLA / Ronald Reagan UCLA Medical Center |                                          | Investigator/study personnel enrolling site SWIFT PRIME | HERMES collaborators                                                                       |
| M.                                | Nour       |                       |                  | UCLA / Ronald Reagan UCLA Medical Center |                                          | Investigator/study personnel enrolling site SWIFT PRIME | HERMES collaborators                                                                       |
| M.                                | McManus    |                       |                  | UCLA / Ronald Reagan UCLA Medical Center |                                          | Investigator/study personnel enrolling site SWIFT PRIME | HERMES collaborators                                                                       |
| J.                                | Huang      |                       |                  | UCLA / Ronald Reagan UCLA Medical Center |                                          | Investigator/study personnel enrolling site SWIFT PRIME | HERMES collaborators                                                                       |

## Supplemental Online Content: Nonauthor Collaborators

\*First name, last name, and suffix (if applicable) are required and will appear in PubMed.

| *First Name and Middle Initial(s) | *Last Name        | *Suffix (eg, Jr, III) | Academic Degrees | Institution                                     | Location (city, state/province, country) | Role or Contribution, eg, chair, principal investigator | Group (if more than 1 Group listed in the byline) and/or Subgroup (eg, Steering Committee) |
|-----------------------------------|-------------------|-----------------------|------------------|-------------------------------------------------|------------------------------------------|---------------------------------------------------------|--------------------------------------------------------------------------------------------|
| J.                                | Tarpley           |                       |                  | UCLA / Ronald Reagan UCLA Medical Center        |                                          | Investigator/study personnel enrolling site SWIFT PRIME | HERMES collaborators                                                                       |
| S.                                | Teteshima         |                       |                  | UCLA / Ronald Reagan UCLA Medical Center        |                                          | Investigator/study personnel enrolling site SWIFT PRIME | HERMES collaborators                                                                       |
| N.                                | Gonzalez          |                       |                  | UCLA / Ronald Reagan UCLA Medical Center        |                                          | Investigator/study personnel enrolling site SWIFT PRIME | HERMES collaborators                                                                       |
| L.                                | Ali               |                       |                  | UCLA / Ronald Reagan UCLA Medical Center        |                                          | Investigator/study personnel enrolling site SWIFT PRIME | HERMES collaborators                                                                       |
| D.                                | Liebeskind        |                       |                  | UCLA / Ronald Reagan UCLA Medical Center        |                                          | Investigator/study personnel enrolling site SWIFT PRIME | HERMES collaborators                                                                       |
| J.                                | Hinman            |                       |                  | UCLA / Ronald Reagan UCLA Medical Center        |                                          | Investigator/study personnel enrolling site SWIFT PRIME | HERMES collaborators                                                                       |
| M.                                | Calderon-Arnulphi |                       |                  | UCLA / Ronald Reagan UCLA Medical Center        |                                          | Investigator/study personnel enrolling site SWIFT PRIME | HERMES collaborators                                                                       |
| C.                                | Liang             |                       |                  | UCLA / Ronald Reagan UCLA Medical Center        |                                          | Investigator/study personnel enrolling site SWIFT PRIME | HERMES collaborators                                                                       |
| J.                                | Guzy              |                       |                  | UCLA / Ronald Reagan UCLA Medical Center        |                                          | Investigator/study personnel enrolling site SWIFT PRIME | HERMES collaborators                                                                       |
| S.                                | Koch              |                       |                  | University of Miami / Jackson Memorial Hospital |                                          | Investigator/study personnel enrolling site SWIFT PRIME | HERMES collaborators                                                                       |



## Supplemental Online Content: Nonauthor Collaborators

\*First name, last name, and suffix (if applicable) are required and will appear in PubMed.

| *First Name and Middle Initial(s) | *Last Name    | *Suffix (eg, Jr, III) | Academic Degrees | Institution                                     | Location (city, state/province, country) | Role or Contribution, eg, chair, principal investigator | Group (if more than 1 Group listed in the byline) and/or Subgroup (eg, Steering Committee) |
|-----------------------------------|---------------|-----------------------|------------------|-------------------------------------------------|------------------------------------------|---------------------------------------------------------|--------------------------------------------------------------------------------------------|
| K.                                | DeSousa       |                       |                  | University of Miami / Jackson Memorial Hospital |                                          | Investigator/study personnel enrolling site SWIFT PRIME | HERMES collaborators                                                                       |
| G.                                | Gordon-Perue  |                       |                  | University of Miami / Jackson Memorial Hospital |                                          | Investigator/study personnel enrolling site SWIFT PRIME | HERMES collaborators                                                                       |
| D.                                | Haussen       |                       |                  | University of Miami / Jackson Memorial Hospital |                                          | Investigator/study personnel enrolling site SWIFT PRIME | HERMES collaborators                                                                       |
| M.                                | Elhammady     |                       |                  | University of Miami / Jackson Memorial Hospital |                                          | Investigator/study personnel enrolling site SWIFT PRIME | HERMES collaborators                                                                       |
| E.                                | Peterson      |                       |                  | University of Miami / Jackson Memorial Hospital |                                          | Investigator/study personnel enrolling site SWIFT PRIME | HERMES collaborators                                                                       |
| V.                                | Pandey        |                       |                  | University of Miami / Jackson Memorial Hospital |                                          | Investigator/study personnel enrolling site SWIFT PRIME | HERMES collaborators                                                                       |
| S.                                | Dharmadhikari |                       |                  | University of Miami / Jackson Memorial Hospital |                                          | Investigator/study personnel enrolling site SWIFT PRIME | HERMES collaborators                                                                       |
| P.                                | Khandelwal    |                       |                  | University of Miami / Jackson Memorial Hospital |                                          | Investigator/study personnel enrolling site SWIFT PRIME | HERMES collaborators                                                                       |
| A.                                | Malik         |                       |                  | University of Miami / Jackson Memorial Hospital |                                          | Investigator/study personnel enrolling site SWIFT PRIME | HERMES collaborators                                                                       |
| R.                                | Pafford       |                       |                  | University of Miami / Jackson Memorial Hospital |                                          | Investigator/study personnel enrolling site SWIFT PRIME | HERMES collaborators                                                                       |

## Supplemental Online Content: Nonauthor Collaborators

\*First name, last name, and suffix (if applicable) are required and will appear in PubMed.

| *First Name and Middle Initial(s) | *Last Name               | *Suffix (eg, Jr, III) | Academic Degrees | Institution                                     | Location (city, state/province, country) | Role or Contribution, eg, chair, principal investigator | Group (if more than 1 Group listed in the byline) and/or Subgroup (eg, Steering Committee) |
|-----------------------------------|--------------------------|-----------------------|------------------|-------------------------------------------------|------------------------------------------|---------------------------------------------------------|--------------------------------------------------------------------------------------------|
| P.                                | Gonzalez                 |                       |                  | University of Miami / Jackson Memorial Hospital |                                          | Investigator/study personnel enrolling site SWIFT PRIME | HERMES collaborators                                                                       |
| K.                                | Ramdas                   |                       |                  | University of Miami / Jackson Memorial Hospital |                                          | Investigator/study personnel enrolling site SWIFT PRIME | HERMES collaborators                                                                       |
| G.                                | Andersen                 |                       |                  | Aarhus University Hospital                      |                                          | PI enrolling site SWIFT PRIME                           | HERMES collaborators                                                                       |
| D.                                | Damgaard                 |                       |                  | Aarhus University Hospital                      |                                          | Investigator/study personnel enrolling site SWIFT PRIME | HERMES collaborators                                                                       |
| P.                                | Von Weitzel-Mudersbach   |                       |                  | Aarhus University Hospital                      |                                          | Investigator/study personnel enrolling site SWIFT PRIME | HERMES collaborators                                                                       |
| C.                                | Simonsen                 |                       |                  | Aarhus University Hospital                      |                                          | Investigator/study personnel enrolling site SWIFT PRIME | HERMES collaborators                                                                       |
| N.                                | Ruiz de Morales Ayurdate |                       |                  | Aarhus University Hospital                      |                                          | Investigator/study personnel enrolling site SWIFT PRIME | HERMES collaborators                                                                       |
| M.                                | Poulsen                  |                       |                  | Aarhus University Hospital                      |                                          | Investigator/study personnel enrolling site SWIFT PRIME | HERMES collaborators                                                                       |
| L.                                | Sørensen                 |                       |                  | Aarhus University Hospital                      |                                          | Investigator/study personnel enrolling site SWIFT PRIME | HERMES collaborators                                                                       |
| S.                                | Karabegovich             |                       |                  | Aarhus University Hospital                      |                                          | Investigator/study personnel enrolling site SWIFT PRIME | HERMES collaborators                                                                       |
| M.                                | Hjørringgaard            |                       |                  | Aarhus University Hospital                      |                                          | Investigator/study personnel enrolling site SWIFT PRIME | HERMES collaborators                                                                       |

## Supplemental Online Content: Nonauthor Collaborators

\*First name, last name, and suffix (if applicable) are required and will appear in PubMed.

| *First Name and Middle Initial(s) | *Last Name | *Suffix (eg, Jr, III) | Academic Degrees | Institution                                             | Location (city, state/province, country) | Role or Contribution, eg, chair, principal investigator | Group (if more than 1 Group listed in the byline) and/or Subgroup (eg, Steering Committee) |
|-----------------------------------|------------|-----------------------|------------------|---------------------------------------------------------|------------------------------------------|---------------------------------------------------------|--------------------------------------------------------------------------------------------|
| N.                                | Hjort      |                       |                  | Aarhus University Hospital                              |                                          | Investigator/study personnel enrolling site SWIFT PRIME | HERMES collaborators                                                                       |
| T.                                | Harbo      |                       |                  | Aarhus University Hospital                              |                                          | Investigator/study personnel enrolling site SWIFT PRIME | HERMES collaborators                                                                       |
| K.                                | Sørensen   |                       |                  | Aarhus University Hospital                              |                                          | Investigator/study personnel enrolling site SWIFT PRIME | HERMES collaborators                                                                       |
| E.                                | Deshaies   |                       |                  | State University of New York Upstate Medical University |                                          | PI enrolling site SWIFT PRIME                           | HERMES collaborators                                                                       |
| D.                                | Padalino   |                       |                  | State University of New York Upstate Medical University |                                          | Investigator/study personnel enrolling site SWIFT PRIME | HERMES collaborators                                                                       |
| A.                                | Swarnkar   |                       |                  | State University of New York Upstate Medical University |                                          | Investigator/study personnel enrolling site SWIFT PRIME | HERMES collaborators                                                                       |
| J.G.                              | Latorre    |                       |                  | State University of New York Upstate Medical University |                                          | Investigator/study personnel enrolling site SWIFT PRIME | HERMES collaborators                                                                       |
| E.                                | Elnour     |                       |                  | State University of New York Upstate Medical University |                                          | Investigator/study personnel enrolling site SWIFT PRIME | HERMES collaborators                                                                       |
| Z.                                | El-Zammar  |                       |                  | State University of New York Upstate Medical University |                                          | Investigator/study personnel enrolling site SWIFT PRIME | HERMES collaborators                                                                       |
| M.                                | Villwock   |                       |                  | State University of New York Upstate Medical University |                                          | Investigator/study personnel enrolling site SWIFT PRIME | HERMES collaborators                                                                       |
| H.                                | Farid      |                       |                  | St. Jude Medical Center                                 |                                          | PI enrolling site SWIFT PRIME                           | HERMES collaborators                                                                       |

## Supplemental Online Content: Nonauthor Collaborators

\*First name, last name, and suffix (if applicable) are required and will appear in PubMed.

| *First Name and Middle Initial(s) | *Last Name      | *Suffix (eg, Jr, III) | Academic Degrees | Institution                                     | Location (city, state/province, country) | Role or Contribution, eg, chair, principal investigator | Group (if more than 1 Group listed in the byline) and/or Subgroup (eg, Steering Committee) |
|-----------------------------------|-----------------|-----------------------|------------------|-------------------------------------------------|------------------------------------------|---------------------------------------------------------|--------------------------------------------------------------------------------------------|
| A.                                | Balgude         |                       |                  | St. Jude Medical Center                         |                                          | Investigator/study personnel enrolling site SWIFT PRIME | HERMES collaborators                                                                       |
| L.                                | Cross           |                       |                  | St. Jude Medical Center                         |                                          | Investigator/study personnel enrolling site SWIFT PRIME | HERMES collaborators                                                                       |
| K.                                | Hansen          |                       |                  | Rigshospitalet - Copenhagen University Hospital |                                          | PI enrolling site SWIFT PRIME                           | HERMES collaborators                                                                       |
| M.                                | Holtmannspötter |                       |                  | Rigshospitalet - Copenhagen University Hospital |                                          | PI enrolling site SWIFT PRIME                           | HERMES collaborators                                                                       |
| D.                                | Kondziella      |                       |                  | Rigshospitalet - Copenhagen University Hospital |                                          | Investigator/study personnel enrolling site SWIFT PRIME | HERMES collaborators                                                                       |
| J.                                | Hoejgaard       |                       |                  | Rigshospitalet - Copenhagen University Hospital |                                          | Investigator/study personnel enrolling site SWIFT PRIME | HERMES collaborators                                                                       |
| S.                                | Taudorf         |                       |                  | Rigshospitalet - Copenhagen University Hospital |                                          | Investigator/study personnel enrolling site SWIFT PRIME | HERMES collaborators                                                                       |
| H.                                | Soendergaard    |                       |                  | Rigshospitalet - Copenhagen University Hospital |                                          | Investigator/study personnel enrolling site SWIFT PRIME | HERMES collaborators                                                                       |
| A.                                | Wagner          |                       |                  | Rigshospitalet - Copenhagen University Hospital |                                          | Investigator/study personnel enrolling site SWIFT PRIME | HERMES collaborators                                                                       |
| M.                                | Cronquist       |                       |                  | Rigshospitalet - Copenhagen University Hospital |                                          | Investigator/study personnel enrolling site SWIFT PRIME | HERMES collaborators                                                                       |
| T.                                | Stavngaard      |                       |                  | Rigshospitalet - Copenhagen University Hospital |                                          | Investigator/study personnel enrolling site SWIFT PRIME | HERMES collaborators                                                                       |

## Supplemental Online Content: Nonauthor Collaborators

\*First name, last name, and suffix (if applicable) are required and will appear in PubMed.

| *First Name and Middle Initial(s) | *Last Name   | *Suffix (eg, Jr, III) | Academic Degrees | Institution                                     | Location (city, state/province, country) | Role or Contribution, eg, chair, principal investigator | Group (if more than 1 Group listed in the byline) and/or Subgroup (eg, Steering Committee) |
|-----------------------------------|--------------|-----------------------|------------------|-------------------------------------------------|------------------------------------------|---------------------------------------------------------|--------------------------------------------------------------------------------------------|
| M.                                | Cortsen      |                       |                  | Rigshospitalet - Copenhagen University Hospital |                                          | Investigator/study personnel enrolling site SWIFT PRIME | HERMES collaborators                                                                       |
| L.H.                              | Krarpup      |                       |                  | Rigshospitalet - Copenhagen University Hospital |                                          | Investigator/study personnel enrolling site SWIFT PRIME | HERMES collaborators                                                                       |
| T.                                | Hylidal      |                       |                  | Rigshospitalet - Copenhagen University Hospital |                                          | Investigator/study personnel enrolling site SWIFT PRIME | HERMES collaborators                                                                       |
| H.P.                              | Haring       |                       |                  | Landes - Nervenlinik Wagner-Jauregg             |                                          | PI enrolling site SWIFT PRIME                           | HERMES collaborators                                                                       |
| S.                                | Guggenberger |                       |                  | Landes - Nervenlinik Wagner-Jauregg             |                                          | Investigator/study personnel enrolling site SWIFT PRIME | HERMES collaborators                                                                       |
| M.                                | Hamberger    |                       |                  | Landes - Nervenlinik Wagner-Jauregg             |                                          | Investigator/study personnel enrolling site SWIFT PRIME | HERMES collaborators                                                                       |
| J.                                | Trenkler     |                       |                  | Landes - Nervenlinik Wagner-Jauregg             |                                          | Investigator/study personnel enrolling site SWIFT PRIME | HERMES collaborators                                                                       |
| M.                                | Sonnberger   |                       |                  | Landes - Nervenlinik Wagner-Jauregg             |                                          | Investigator/study personnel enrolling site SWIFT PRIME | HERMES collaborators                                                                       |
| K.                                | Nussbaumer   |                       |                  | Landes - Nervenlinik Wagner-Jauregg             |                                          | Investigator/study personnel enrolling site SWIFT PRIME | HERMES collaborators                                                                       |
| C.                                | Dominger     |                       |                  | Landes - Nervenlinik Wagner-Jauregg             |                                          | Investigator/study personnel enrolling site SWIFT PRIME | HERMES collaborators                                                                       |
| E.                                | Bach         |                       |                  | Landes - Nervenlinik Wagner-Jauregg             |                                          | Investigator/study personnel enrolling site SWIFT PRIME | HERMES collaborators                                                                       |

## Supplemental Online Content: Nonauthor Collaborators

\*First name, last name, and suffix (if applicable) are required and will appear in PubMed.

| *First Name and Middle Initial(s) | *Last Name  | *Suffix (eg, Jr, III) | Academic Degrees | Institution                    | Location (city, state/province, country) | Role or Contribution, eg, chair, principal investigator | Group (if more than 1 Group listed in the byline) and/or Subgroup (eg, Steering Committee) |
|-----------------------------------|-------------|-----------------------|------------------|--------------------------------|------------------------------------------|---------------------------------------------------------|--------------------------------------------------------------------------------------------|
| B.D.                              | Jagadeesan  |                       |                  | Hennepin County Medical Center |                                          | PI enrolling site SWIFT PRIME                           | HERMES collaborators                                                                       |
| R.                                | Taylor      |                       |                  | Hennepin County Medical Center |                                          | Investigator/study personnel enrolling site SWIFT PRIME | HERMES collaborators                                                                       |
| J.                                | Kim         |                       |                  | Hennepin County Medical Center |                                          | Investigator/study personnel enrolling site SWIFT PRIME | HERMES collaborators                                                                       |
| K.                                | Shea        |                       |                  | Hennepin County Medical Center |                                          | Investigator/study personnel enrolling site SWIFT PRIME | HERMES collaborators                                                                       |
| R.                                | Tummala     |                       |                  | Hennepin County Medical Center |                                          | Investigator/study personnel enrolling site SWIFT PRIME | HERMES collaborators                                                                       |
| H.                                | Zacharatos  |                       |                  | Hennepin County Medical Center |                                          | Investigator/study personnel enrolling site SWIFT PRIME | HERMES collaborators                                                                       |
| D.                                | Sandhu      |                       |                  | Hennepin County Medical Center |                                          | Investigator/study personnel enrolling site SWIFT PRIME | HERMES collaborators                                                                       |
| M.                                | Ezzeddine   |                       |                  | Hennepin County Medical Center |                                          | Investigator/study personnel enrolling site SWIFT PRIME | HERMES collaborators                                                                       |
| A.                                | Grande      |                       |                  | Hennepin County Medical Center |                                          | Investigator/study personnel enrolling site SWIFT PRIME | HERMES collaborators                                                                       |
| D.                                | Hildebrandt |                       |                  | Hennepin County Medical Center |                                          | Investigator/study personnel enrolling site SWIFT PRIME | HERMES collaborators                                                                       |
| K.                                | Miller      |                       |                  | Hennepin County Medical Center |                                          | Investigator/study personnel enrolling site SWIFT PRIME | HERMES collaborators                                                                       |

## Supplemental Online Content: Nonauthor Collaborators

\*First name, last name, and suffix (if applicable) are required and will appear in PubMed.

| *First Name and Middle Initial(s) | *Last Name         | *Suffix (eg, Jr, III) | Academic Degrees | Institution                                            | Location (city, state/province, country) | Role or Contribution, eg, chair, principal investigator | Group (if more than 1 Group listed in the byline) and/or Subgroup (eg, Steering Committee) |
|-----------------------------------|--------------------|-----------------------|------------------|--------------------------------------------------------|------------------------------------------|---------------------------------------------------------|--------------------------------------------------------------------------------------------|
| J.                                | Scherber           |                       |                  | Hennepin County Medical Center                         |                                          | Investigator/study personnel enrolling site SWIFT PRIME | HERMES collaborators                                                                       |
| A.                                | Hendrickson        |                       |                  | Hennepin County Medical Center                         |                                          | Investigator/study personnel enrolling site SWIFT PRIME | HERMES collaborators                                                                       |
| M.                                | Jumaa              |                       |                  | ProMedica Toledo Hospital                              |                                          | PI enrolling site SWIFT PRIME                           | HERMES collaborators                                                                       |
| S.                                | Zaidi              |                       |                  | ProMedica Toledo Hospital                              |                                          | Investigator/study personnel enrolling site SWIFT PRIME | HERMES collaborators                                                                       |
| T.                                | Hendrickson        |                       |                  | ProMedica Toledo Hospital                              |                                          | Investigator/study personnel enrolling site SWIFT PRIME | HERMES collaborators                                                                       |
| V.                                | Snyder             |                       |                  | ProMedica Toledo Hospital                              |                                          | Investigator/study personnel enrolling site SWIFT PRIME | HERMES collaborators                                                                       |
| M.                                | Killer-Oberpfalzer |                       |                  | Universitätsklinikum Christian Doppler Klinik Salzburg |                                          | PI enrolling site SWIFT PRIME                           | HERMES collaborators                                                                       |
| J.                                | Mutzenbach         |                       |                  | Universitätsklinikum Christian Doppler Klinik Salzburg |                                          | Investigator/study personnel enrolling site SWIFT PRIME | HERMES collaborators                                                                       |
| F.                                | Weymayr            |                       |                  | Universitätsklinikum Christian Doppler Klinik Salzburg |                                          | Investigator/study personnel enrolling site SWIFT PRIME | HERMES collaborators                                                                       |
| E.                                | Broussalis         |                       |                  | Universitätsklinikum Christian Doppler Klinik Salzburg |                                          | Investigator/study personnel enrolling site SWIFT PRIME | HERMES collaborators                                                                       |
| K.                                | Stadler            |                       |                  | Universitätsklinikum Christian Doppler Klinik Salzburg |                                          | Investigator/study personnel enrolling site SWIFT PRIME | HERMES collaborators                                                                       |

## Supplemental Online Content: Nonauthor Collaborators

\*First name, last name, and suffix (if applicable) are required and will appear in PubMed.

| *First Name and Middle Initial(s) | *Last Name      | *Suffix (eg, Jr, III) | Academic Degrees | Institution                                            | Location (city, state/province, country) | Role or Contribution, eg, chair, principal investigator | Group (if more than 1 Group listed in the byline) and/or Subgroup (eg, Steering Committee) |
|-----------------------------------|-----------------|-----------------------|------------------|--------------------------------------------------------|------------------------------------------|---------------------------------------------------------|--------------------------------------------------------------------------------------------|
| A.                                | Jedlitschka     |                       |                  | Universitätsklinikum Christian Doppler Klinik Salzburg |                                          | Investigator/study personnel enrolling site SWIFT PRIME | HERMES collaborators                                                                       |
| A.                                | Malek           |                       |                  | Tenet Florida Physician Services                       |                                          | PI enrolling site SWIFT PRIME                           | HERMES collaborators                                                                       |
| N.                                | Mueller-Kronast |                       |                  | Tenet Florida Physician Services                       |                                          | Investigator/study personnel enrolling site SWIFT PRIME | HERMES collaborators                                                                       |
| P.                                | Becker          |                       |                  | Tenet Florida Physician Services                       |                                          | Investigator/study personnel enrolling site SWIFT PRIME | HERMES collaborators                                                                       |
| C.                                | Martin          |                       |                  | Saint Luke's Hospital of Kansas City                   |                                          | PI enrolling site SWIFT PRIME                           | HERMES collaborators                                                                       |
| D.                                | Summers         |                       |                  | Saint Luke's Hospital of Kansas City                   |                                          | Investigator/study personnel enrolling site SWIFT PRIME | HERMES collaborators                                                                       |
| J.                                | Day             |                       |                  | Saint Luke's Hospital of Kansas City                   |                                          | Investigator/study personnel enrolling site SWIFT PRIME | HERMES collaborators                                                                       |
| I.                                | Bettinger       |                       |                  | Saint Luke's Hospital of Kansas City                   |                                          | Investigator/study personnel enrolling site SWIFT PRIME | HERMES collaborators                                                                       |
| W.                                | Holloway        |                       |                  | Saint Luke's Hospital of Kansas City                   |                                          | Investigator/study personnel enrolling site SWIFT PRIME | HERMES collaborators                                                                       |
| K.                                | Olds            |                       |                  | Saint Luke's Hospital of Kansas City                   |                                          | Investigator/study personnel enrolling site SWIFT PRIME | HERMES collaborators                                                                       |
| S.                                | Arkin           |                       |                  | Saint Luke's Hospital of Kansas City                   |                                          | Investigator/study personnel enrolling site SWIFT PRIME | HERMES collaborators                                                                       |



## Supplemental Online Content: Nonauthor Collaborators

\*First name, last name, and suffix (if applicable) are required and will appear in PubMed.

| *First Name and Middle Initial(s) | *Last Name    | *Suffix (eg, Jr, III) | Academic Degrees | Institution                                               | Location (city, state/province, country) | Role or Contribution, eg, chair, principal investigator | Group (if more than 1 Group listed in the byline) and/or Subgroup (eg, Steering Committee) |
|-----------------------------------|---------------|-----------------------|------------------|-----------------------------------------------------------|------------------------------------------|---------------------------------------------------------|--------------------------------------------------------------------------------------------|
| N.                                | Akhtar        |                       |                  | Saint Luke's Hospital of Kansas City                      |                                          | Investigator/study personnel enrolling site SWIFT PRIME | HERMES collaborators                                                                       |
| C.                                | Boutwell      |                       |                  | Saint Luke's Hospital of Kansas City                      |                                          | Investigator/study personnel enrolling site SWIFT PRIME | HERMES collaborators                                                                       |
| S.                                | Crandall      |                       |                  | Saint Luke's Hospital of Kansas City                      |                                          | Investigator/study personnel enrolling site SWIFT PRIME | HERMES collaborators                                                                       |
| M.                                | Schwartzman   |                       |                  | Saint Luke's Hospital of Kansas City                      |                                          | Investigator/study personnel enrolling site SWIFT PRIME | HERMES collaborators                                                                       |
| C.                                | Weinstein     |                       |                  | Saint Luke's Hospital of Kansas City                      |                                          | Investigator/study personnel enrolling site SWIFT PRIME | HERMES collaborators                                                                       |
| B.                                | Brion         |                       |                  | Saint Luke's Hospital of Kansas City                      |                                          | Investigator/study personnel enrolling site SWIFT PRIME | HERMES collaborators                                                                       |
| S.                                | Prothmann     |                       |                  | Klinikum rechts der Isar - Technische Universität München |                                          | PI enrolling site SWIFT PRIME                           | HERMES collaborators                                                                       |
| J.                                | Kleine        |                       |                  | Klinikum rechts der Isar - Technische Universität München |                                          | Investigator/study personnel enrolling site SWIFT PRIME | HERMES collaborators                                                                       |
| K.                                | Kreiser       |                       |                  | Klinikum rechts der Isar - Technische Universität München |                                          | Investigator/study personnel enrolling site SWIFT PRIME | HERMES collaborators                                                                       |
| T.                                | Boeck-Behrens |                       |                  | Klinikum rechts der Isar - Technische Universität München |                                          | Investigator/study personnel enrolling site SWIFT PRIME | HERMES collaborators                                                                       |

## Supplemental Online Content: Nonauthor Collaborators

\*First name, last name, and suffix (if applicable) are required and will appear in PubMed.

| *First Name and Middle Initial(s) | *Last Name           | *Suffix (eg, Jr, III) | Academic Degrees | Institution                                                  | Location (city, state/province, country) | Role or Contribution, eg, chair, principal investigator    | Group (if more than 1 Group listed in the byline) and/or Subgroup (eg, Steering Committee) |
|-----------------------------------|----------------------|-----------------------|------------------|--------------------------------------------------------------|------------------------------------------|------------------------------------------------------------|--------------------------------------------------------------------------------------------|
| H.                                | Poppert              |                       |                  | Klinikum rechts der Isar -<br>Technische Universität München |                                          | Investigator/study personnel<br>enrolling site SWIFT PRIME | HERMES collaborators                                                                       |
| S.                                | Wunderlich           |                       |                  | Klinikum rechts der Isar -<br>Technische Universität München |                                          | Investigator/study personnel<br>enrolling site SWIFT PRIME | HERMES collaborators                                                                       |
| M.L.                              | Koch                 |                       |                  | Klinikum rechts der Isar -<br>Technische Universität München |                                          | Investigator/study personnel<br>enrolling site SWIFT PRIME | HERMES collaborators                                                                       |
| V.                                | Biberacher           |                       |                  | Klinikum rechts der Isar -<br>Technische Universität München |                                          | Investigator/study personnel<br>enrolling site SWIFT PRIME | HERMES collaborators                                                                       |
| A.                                | Huberle              |                       |                  | Klinikum rechts der Isar -<br>Technische Universität München |                                          | Investigator/study personnel<br>enrolling site SWIFT PRIME | HERMES collaborators                                                                       |
| G.                                | Gora-Stahlberg       |                       |                  | Klinikum rechts der Isar -<br>Technische Universität München |                                          | Investigator/study personnel<br>enrolling site SWIFT PRIME | HERMES collaborators                                                                       |
| B.                                | Knier                |                       |                  | Klinikum rechts der Isar -<br>Technische Universität München |                                          | Investigator/study personnel<br>enrolling site SWIFT PRIME | HERMES collaborators                                                                       |
| T.                                | Meindl               |                       |                  | Klinikum rechts der Isar -<br>Technische Universität München |                                          | Investigator/study personnel<br>enrolling site SWIFT PRIME | HERMES collaborators                                                                       |
| D.                                | Utpadel-<br>Fischler |                       |                  | Klinikum rechts der Isar -<br>Technische Universität München |                                          | Investigator/study personnel<br>enrolling site SWIFT PRIME | HERMES collaborators                                                                       |
| M.                                | Zech                 |                       |                  | Klinikum rechts der Isar -<br>Technische Universität München |                                          | Investigator/study personnel<br>enrolling site SWIFT PRIME | HERMES collaborators                                                                       |

## Supplemental Online Content: Nonauthor Collaborators

\*First name, last name, and suffix (if applicable) are required and will appear in PubMed.

| *First Name and Middle Initial(s) | *Last Name | *Suffix (eg, Jr, III) | Academic Degrees | Institution                                               | Location (city, state/province, country) | Role or Contribution, eg, chair, principal investigator | Group (if more than 1 Group listed in the byline) and/or Subgroup (eg, Steering Committee) |
|-----------------------------------|------------|-----------------------|------------------|-----------------------------------------------------------|------------------------------------------|---------------------------------------------------------|--------------------------------------------------------------------------------------------|
| M.                                | Kowarik    |                       |                  | Klinikum rechts der Isar - Technische Universität München |                                          | Investigator/study personnel enrolling site SWIFT PRIME | HERMES collaborators                                                                       |
| C.                                | Seifert    |                       |                  | Klinikum rechts der Isar - Technische Universität München |                                          | Investigator/study personnel enrolling site SWIFT PRIME | HERMES collaborators                                                                       |
| B.                                | Schwaiger  |                       |                  | Klinikum rechts der Isar - Technische Universität München |                                          | Investigator/study personnel enrolling site SWIFT PRIME | HERMES collaborators                                                                       |
| A.                                | Puri       |                       |                  | University of Massachusetts Medical Center                |                                          | PI enrolling site SWIFT PRIME                           | HERMES collaborators                                                                       |
| S.                                | Hou        |                       |                  | University of Massachusetts Medical Center                |                                          | Investigator/study personnel enrolling site SWIFT PRIME | HERMES collaborators                                                                       |
| A.                                | Wakhloo    |                       |                  | University of Massachusetts Medical Center                |                                          | Investigator/study personnel enrolling site SWIFT PRIME | HERMES collaborators                                                                       |
| M.                                | Moonis     |                       |                  | University of Massachusetts Medical Center                |                                          | Investigator/study personnel enrolling site SWIFT PRIME | HERMES collaborators                                                                       |
| N.                                | Henniger   |                       |                  | University of Massachusetts Medical Center                |                                          | Investigator/study personnel enrolling site SWIFT PRIME | HERMES collaborators                                                                       |
| R.                                | Goddeau    |                       |                  | University of Massachusetts Medical Center                |                                          | Investigator/study personnel enrolling site SWIFT PRIME | HERMES collaborators                                                                       |
| F.                                | Massari    |                       |                  | University of Massachusetts Medical Center                |                                          | Investigator/study personnel enrolling site SWIFT PRIME | HERMES collaborators                                                                       |
| A.                                | Minaeian   |                       |                  | University of Massachusetts Medical Center                |                                          | Investigator/study personnel enrolling site SWIFT PRIME | HERMES collaborators                                                                       |

## Supplemental Online Content: Nonauthor Collaborators

\*First name, last name, and suffix (if applicable) are required and will appear in PubMed.

| *First Name and Middle Initial(s) | *Last Name | *Suffix (eg, Jr, III) | Academic Degrees | Institution                                | Location (city, state/province, country) | Role or Contribution, eg, chair, principal investigator                   | Group (if more than 1 Group listed in the byline) and/or Subgroup (eg, Steering Committee) |
|-----------------------------------|------------|-----------------------|------------------|--------------------------------------------|------------------------------------------|---------------------------------------------------------------------------|--------------------------------------------------------------------------------------------|
| J.D.                              | Lorazo     |                       |                  | University of Massachusetts Medical Center |                                          | Investigator/study personnel enrolling site SWIFT PRIME                   | HERMES collaborators                                                                       |
| M.                                | Ramzan     |                       |                  | University of Massachusetts Medical Center |                                          | Investigator/study personnel enrolling site SWIFT PRIME                   | HERMES collaborators                                                                       |
| C.                                | Stout      |                       |                  | University of Massachusetts Medical Center |                                          | Investigator/study personnel enrolling site SWIFT PRIME                   | HERMES collaborators                                                                       |
| A.                                | Patel      |                       |                  | University of Massachusetts Medical Center |                                          | Investigator/study personnel enrolling site SWIFT PRIME                   | HERMES collaborators                                                                       |
| A.                                | Tunguturi  |                       |                  | University of Massachusetts Medical Center |                                          | Investigator/study personnel enrolling site SWIFT PRIME                   | HERMES collaborators                                                                       |
| S.                                | Onteddu    |                       |                  | University of Massachusetts Medical Center |                                          | Investigator/study personnel enrolling site SWIFT PRIME                   | HERMES collaborators                                                                       |
| R.                                | Carandang  |                       |                  | University of Massachusetts Medical Center |                                          | Investigator/study personnel enrolling site SWIFT PRIME                   | HERMES collaborators                                                                       |
| M.                                | Howk       |                       |                  | University of Massachusetts Medical Center |                                          | Investigator/study personnel enrolling site SWIFT PRIME                   | HERMES collaborators                                                                       |
| Antoni                            | Dávalos    |                       |                  | Hospital Germans Trias Trias I Pujol       | Barcelona, Spain                         | Steering Committee REVASCAT trial (Co-chair), Investigator enrolling site | HERMES collaborators                                                                       |
| Tudor G.                          | Jovin      |                       |                  | UPMC                                       | Pittsburgh, Pennsylvania, USA            | Steering Committee REVASCAT trial (Co-chair)                              | HERMES collaborators                                                                       |

## Supplemental Online Content: Nonauthor Collaborators

\*First name, last name, and suffix (if applicable) are required and will appear in PubMed.

| *First Name and Middle Initial(s) | *Last Name     | *Suffix (eg, Jr, III) | Academic Degrees | Institution                          | Location (city, state/province, country) | Role or Contribution, eg, chair, principal investigator                       | Group (if more than 1 Group listed in the byline) and/or Subgroup (eg, Steering Committee) |
|-----------------------------------|----------------|-----------------------|------------------|--------------------------------------|------------------------------------------|-------------------------------------------------------------------------------|--------------------------------------------------------------------------------------------|
| Angel                             | Chamorro       |                       |                  | Hospital Clínic Barcelona            | Barcelona, Spain                         | Steering Committee REVASCAT trial, PI enrolling site REVASCAT trial           | HERMES collaborators                                                                       |
| Carlos A.                         | Molina         |                       |                  | Hospital Vall d'Hebrón               | Barcelona, Spain                         | Steering Committee REVASCAT trial, Investigator enrolling site REVASCAT trial | HERMES collaborators                                                                       |
| Joaquin                           | Serena         |                       |                  | Hospital Josep Trueta                | Girona, Spain                            | Steering Committee REVASCAT trial                                             | HERMES collaborators                                                                       |
| Luis                              | San Román      |                       |                  | Hospital Clínic Barcelona            | Barcelona, Spain                         | Steering Committee REVASCAT trial                                             | HERMES collaborators                                                                       |
| Angeles                           | de Miquel      |                       |                  | Hospital de Bellvitge                | Barcelona, Spain                         | Steering Committee REVASCAT trial, Investigator enrolling site REVASCAT trial | HERMES collaborators                                                                       |
| Àlex                              | Rovira         |                       |                  | Hospital Vall d'Hebrón               | Barcelona, Spain                         | Steering Committee REVASCAT trial, Investigator enrolling site REVASCAT trial | HERMES collaborators                                                                       |
| Erik                              | Cobo           |                       |                  | Universitat politecnica de catalunya | Barcelona, Spain                         | Steering Committee REVASCAT trial (Statistician)                              | HERMES collaborators                                                                       |
| G.                                | Albers         |                       |                  |                                      |                                          | DSMB REVASCAT trial (chair)                                                   | HERMES collaborators                                                                       |
| K.                                | Lees           |                       |                  |                                      |                                          | DSMB REVASCAT trial                                                           | HERMES collaborators                                                                       |
| J.                                | Arenillas Lara |                       |                  |                                      |                                          | DSMB REVASCAT trial                                                           | HERMES collaborators                                                                       |
| R.                                | Roberts        |                       |                  |                                      |                                          | DSMB REVASCAT trial (Independent statistician)                                | HERMES collaborators                                                                       |
| Mayank                            | Goyal          |                       |                  |                                      |                                          | Neuroimaging Corelab REVASCAT trial                                           | HERMES collaborators                                                                       |
| Andrew M.                         | Demchuk        |                       |                  |                                      |                                          | Neuroimaging Corelab REVASCAT trial                                           | HERMES collaborators                                                                       |
| P.                                | Minhas         |                       |                  |                                      |                                          | Neuroimaging Corelab REVASCAT trial                                           | HERMES collaborators                                                                       |

## Supplemental Online Content: Nonauthor Collaborators

\*First name, last name, and suffix (if applicable) are required and will appear in PubMed.

| *First Name and Middle Initial(s) | *Last Name      | *Suffix (eg, Jr, III) | Academic Degrees | Institution                    | Location (city, state/province, country) | Role or Contribution, eg, chair, principal investigator                     | Group (if more than 1 Group listed in the byline) and/or Subgroup (eg, Steering Committee) |
|-----------------------------------|-----------------|-----------------------|------------------|--------------------------------|------------------------------------------|-----------------------------------------------------------------------------|--------------------------------------------------------------------------------------------|
| F.                                | Al-Ajlan        |                       |                  |                                |                                          | Neuroimaging Corelab<br>REVASCAT trial                                      | HERMES collaborators                                                                       |
| M.                                | Salluzi         |                       |                  |                                |                                          | Neuroimaging Corelab<br>REVASCAT trial                                      | HERMES collaborators                                                                       |
| L.                                | Zimmel          |                       |                  |                                |                                          | Neuroimaging Corelab<br>REVASCAT trial                                      | HERMES collaborators                                                                       |
| S.                                | Patel           |                       |                  |                                |                                          | Neuroimaging Corelab<br>REVASCAT trial                                      | HERMES collaborators                                                                       |
| M.                                | Eesa            |                       |                  |                                |                                          | Neuroimaging Corelab<br>REVASCAT trial                                      | HERMES collaborators                                                                       |
| R.                                | von Kummer      |                       |                  |                                |                                          | Angiography Corelab<br>REVASCAT trial                                       | HERMES collaborators                                                                       |
| J.                                | Martí-Fàbregas  |                       |                  |                                |                                          | Critical Events Committee<br>REVASCAT trial                                 | HERMES collaborators                                                                       |
| B.                                | Jankowitz       |                       |                  |                                |                                          | Critical Events Committee<br>REVASCAT trial                                 | HERMES collaborators                                                                       |
| J.                                | Serena          |                       |                  |                                |                                          | Central blinded evaluation of<br>Modified Rankin Scale<br>REVASCAT trial    | HERMES collaborators                                                                       |
| M.                                | Salvat-Plana    |                       |                  |                                |                                          | Central blinded evaluation of<br>Modified Rankin Scale<br>REVASCAT trial    | HERMES collaborators                                                                       |
| E.                                | López-Cancio    |                       |                  | Hospital Germans Trias I Pujol | Barcelona, Spain                         | Trial Coordination Center<br>REVASCAT trial, Investigator<br>enrolling site | HERMES collaborators                                                                       |
| M.                                | Hernandez-Pérez |                       |                  | Hospital Germans Trias I Pujol | Barcelona, Spain                         | Trial Coordination Center<br>REVASCAT trial, Investigator<br>enrolling site | HERMES collaborators                                                                       |
| M.                                | Ribó            |                       |                  | Hospital Vall d'Hebrón         |                                          | PI enrolling site<br>REVASCAT trial                                         | HERMES collaborators                                                                       |
| E.                                | Sanjuan         |                       |                  | Hospital Vall d'Hebrón         |                                          | Investigator enrolling site<br>REVASCAT trial                               | HERMES collaborators                                                                       |

## Supplemental Online Content: Nonauthor Collaborators

\*First name, last name, and suffix (if applicable) are required and will appear in PubMed.

| *First Name and Middle Initial(s) | *Last Name  | *Suffix (eg, Jr, III) | Academic Degrees | Institution            | Location (city, state/province, country) | Role or Contribution, eg, chair, principal investigator | Group (if more than 1 Group listed in the byline) and/or Subgroup (eg, Steering Committee) |
|-----------------------------------|-------------|-----------------------|------------------|------------------------|------------------------------------------|---------------------------------------------------------|--------------------------------------------------------------------------------------------|
| M.                                | Rubiera     |                       |                  | Hospital Vall d'Hebrón |                                          | Investigator enrolling site REVASCAT trial              | HERMES collaborators                                                                       |
| J.                                | Pagola      |                       |                  | Hospital Vall d'Hebrón |                                          | Investigator enrolling site REVASCAT trial              | HERMES collaborators                                                                       |
| A.                                | Flores      |                       |                  | Hospital Vall d'Hebrón |                                          | Investigator enrolling site REVASCAT trial              | HERMES collaborators                                                                       |
| M.                                | Muchada     |                       |                  | Hospital Vall d'Hebrón |                                          | Investigator enrolling site REVASCAT trial              | HERMES collaborators                                                                       |
| P.                                | Meler       |                       |                  | Hospital Vall d'Hebrón |                                          | Investigator enrolling site REVASCAT trial              | HERMES collaborators                                                                       |
| E.                                | Huerga      |                       |                  | Hospital Vall d'Hebrón |                                          | Investigator enrolling site REVASCAT trial              | HERMES collaborators                                                                       |
| S.                                | Galabert    |                       |                  | Hospital Vall d'Hebrón |                                          | Investigator enrolling site REVASCAT trial              | HERMES collaborators                                                                       |
| P.                                | Coscojuela  |                       |                  | Hospital Vall d'Hebrón |                                          | Investigator enrolling site REVASCAT trial              | HERMES collaborators                                                                       |
| A.                                | Tomasello   |                       |                  | Hospital Vall d'Hebrón |                                          | Investigator enrolling site REVASCAT trial              | HERMES collaborators                                                                       |
| D.                                | Rodriguez   |                       |                  | Hospital Vall d'Hebrón |                                          | Investigator enrolling site REVASCAT trial              | HERMES collaborators                                                                       |
| E.                                | Santamarina |                       |                  | Hospital Vall d'Hebrón |                                          | Investigator enrolling site REVASCAT trial              | HERMES collaborators                                                                       |
| O.                                | Maisterra   |                       |                  | Hospital Vall d'Hebrón |                                          | Investigator enrolling site REVASCAT trial              | HERMES collaborators                                                                       |
| S.                                | Boned       |                       |                  | Hospital Vall d'Hebrón |                                          | Investigator enrolling site REVASCAT trial              | HERMES collaborators                                                                       |
| L.                                | Seró        |                       |                  | Hospital Vall d'Hebrón |                                          | Investigator enrolling site REVASCAT trial              | HERMES collaborators                                                                       |
| M.                                | Millán      |                       |                  | Hospital Germans Trias |                                          | PI enrolling site REVASCAT trial                        | HERMES collaborators                                                                       |
| L.                                | Muñoz       |                       |                  | Hospital Germans Trias |                                          | Investigator enrolling site REVASCAT trial              | HERMES collaborators                                                                       |

## Supplemental Online Content: Nonauthor Collaborators

\*First name, last name, and suffix (if applicable) are required and will appear in PubMed.

| *First Name and Middle Initial(s) | *Last Name       | *Suffix (eg, Jr, III) | Academic Degrees | Institution            | Location (city, state/province, country) | Role or Contribution, eg, chair, principal investigator | Group (if more than 1 Group listed in the byline) and/or Subgroup (eg, Steering Committee) |
|-----------------------------------|------------------|-----------------------|------------------|------------------------|------------------------------------------|---------------------------------------------------------|--------------------------------------------------------------------------------------------|
| N.                                | Pérez de la Ossa |                       |                  | Hospital Germans Trias |                                          | Investigator enrolling site REVASCAT trial              | HERMES collaborators                                                                       |
| M.                                | Gomis            |                       |                  | Hospital Germans Trias |                                          | Investigator enrolling site REVASCAT trial              | HERMES collaborators                                                                       |
| L.                                | Dorado           |                       |                  | Hospital Germans Trias |                                          | Investigator enrolling site REVASCAT trial              | HERMES collaborators                                                                       |
| E.                                | Palomeras        |                       |                  | Hospital Germans Trias |                                          | Investigator enrolling site REVASCAT trial              | HERMES collaborators                                                                       |
| J.                                | Munuera          |                       |                  | Hospital Germans Trias |                                          | Investigator enrolling site REVASCAT trial              | HERMES collaborators                                                                       |
| P.                                | García Bermejo   |                       |                  | Hospital Germans Trias |                                          | Investigator enrolling site REVASCAT trial              | HERMES collaborators                                                                       |
| S.                                | Remollo          |                       |                  | Hospital Germans Trias |                                          | Investigator enrolling site REVASCAT trial              | HERMES collaborators                                                                       |
| C.                                | Castaño          |                       |                  | Hospital Germans Trias |                                          | Investigator enrolling site REVASCAT trial              | HERMES collaborators                                                                       |
| R.                                | García-Sort      |                       |                  | Hospital Germans Trias |                                          | Investigator enrolling site REVASCAT trial              | HERMES collaborators                                                                       |
| P.                                | Cuadras          |                       |                  | Hospital Germans Trias |                                          | Investigator enrolling site REVASCAT trial              | HERMES collaborators                                                                       |
| P.                                | Puyalto          |                       |                  | Hospital Germans Trias |                                          | Investigator enrolling site REVASCAT trial              | HERMES collaborators                                                                       |
| M.                                | Jiménez          |                       |                  | Hospital Germans Trias |                                          | Investigator enrolling site REVASCAT trial              | HERMES collaborators                                                                       |
| A.                                | Martínez-Piñeiro |                       |                  | Hospital Germans Trias |                                          | Investigator enrolling site REVASCAT trial              | HERMES collaborators                                                                       |
| G.                                | Lucente          |                       |                  | Hospital Germans Trias |                                          | Investigator enrolling site REVASCAT trial              | HERMES collaborators                                                                       |
| X.                                | Urra             |                       |                  | Hospital Clínic        |                                          | PI enrolling site REVASCAT trial                        | HERMES collaborators                                                                       |
| V.                                | Obach            |                       |                  | Hospital Clínic        |                                          | Investigator enrolling site REVASCAT trial              | HERMES collaborators                                                                       |



## Supplemental Online Content: Nonauthor Collaborators

\*First name, last name, and suffix (if applicable) are required and will appear in PubMed.

| *First Name and Middle Initial(s) | *Last Name | *Suffix (eg, Jr, III) | Academic Degrees | Institution                                             | Location (city, state/province, country) | Role or Contribution, eg, chair, principal investigator              | Group (if more than 1 Group listed in the byline) and/or Subgroup (eg, Steering Committee) |
|-----------------------------------|------------|-----------------------|------------------|---------------------------------------------------------|------------------------------------------|----------------------------------------------------------------------|--------------------------------------------------------------------------------------------|
| A.                                | Cervera    |                       |                  | Hospital Clínic                                         |                                          | Investigator enrolling site REVASCAT trial                           | HERMES collaborators                                                                       |
| S.                                | Amaro      |                       |                  | Hospital Clínic                                         |                                          | Investigator enrolling site REVASCAT trial                           | HERMES collaborators                                                                       |
| L.                                | Llull      |                       |                  | Hospital Clínic                                         |                                          | Investigator enrolling site REVASCAT trial                           | HERMES collaborators                                                                       |
| J.                                | Codas      |                       |                  | Hospital Clínic                                         |                                          | Investigator enrolling site REVASCAT trial                           | HERMES collaborators                                                                       |
| M.                                | Balasa     |                       |                  | Hospital Clínic                                         |                                          | Investigator enrolling site REVASCAT trial                           | HERMES collaborators                                                                       |
| J.                                | Navarro    |                       |                  | Hospital Clínic                                         |                                          | Investigator enrolling site REVASCAT trial                           | HERMES collaborators                                                                       |
| N.                                | Macías     |                       |                  | Hospital Clínic                                         |                                          | Investigator enrolling site REVASCAT trial                           | HERMES collaborators                                                                       |
| P.                                | Cardona    |                       |                  | Hospital de Bellvitge                                   |                                          | PI enrolling site REVASCAT trial                                     | HERMES collaborators                                                                       |
| H.                                | Quesada    |                       |                  | Hospital de Bellvitge                                   |                                          | Investigator enrolling site REVASCAT trial                           | HERMES collaborators                                                                       |
| F.                                | Rubio      |                       |                  | Hospital de Bellvitge                                   |                                          | Investigator enrolling site REVASCAT trial                           | HERMES collaborators                                                                       |
| L.                                | Cano       |                       |                  | Hospital de Bellvitge                                   |                                          | Investigator enrolling site REVASCAT trial                           | HERMES collaborators                                                                       |
| B.                                | Lara       |                       |                  | Hospital de Bellvitge                                   |                                          | Investigator enrolling site REVASCAT trial                           | HERMES collaborators                                                                       |
| M.A.                              | de Miquel  |                       |                  | Hospital de Bellvitge                                   |                                          | Investigator enrolling site REVASCAT trial                           | HERMES collaborators                                                                       |
| L.                                | Aja        |                       |                  | Hospital de Bellvitge                                   |                                          | Investigator enrolling site REVASCAT trial                           | HERMES collaborators                                                                       |
| Serge                             | Bracard    |                       |                  | University of Lorraine and University Hospital of Nancy | Nancy, France                            | Steering Committee THRACE, Thrombectomy systems Validation Committee | HERMES collaborators                                                                       |

## Supplemental Online Content: Nonauthor Collaborators

\*First name, last name, and suffix (if applicable) are required and will appear in PubMed.

| *First Name and Middle Initial(s) | *Last Name | *Suffix (eg, Jr, III) | Academic Degrees | Institution                                             | Location (city, state/province, country) | Role or Contribution, eg, chair, principal investigator            | Group (if more than 1 Group listed in the byline) and/or Subgroup (eg, Steering Committee) |
|-----------------------------------|------------|-----------------------|------------------|---------------------------------------------------------|------------------------------------------|--------------------------------------------------------------------|--------------------------------------------------------------------------------------------|
| Xavier                            | Ducrocq    |                       |                  | University of Lorraine and University Hospital of Nancy | Nancy, France                            | Steering Committee THRACE                                          | HERMES collaborators                                                                       |
| Jean-Louis                        | Mas        |                       |                  | Sainte-Anne Hospital and Paris-Descartes University     | Paris-Sainte Anne, France                | Neuroimaging Corelab REVASCAT trial, Investigator enrolling center | HERMES collaborators                                                                       |
| M.                                | Soudant    |                       |                  | University of Lorraine and University Hospital of Nancy | Nancy, France                            | Statistician THRACE                                                | HERMES collaborators                                                                       |
| Catherine                         | Oppenheim  |                       |                  | Sainte-Anne Hospital and Paris-Descartes University     | Paris-Sainte Anne, France                | Imaging Core Laboratory THRACE                                     | HERMES collaborators                                                                       |
| Thierry                           | Moulin     |                       |                  | University Hospital of Besançon                         | Besançon France                          | Steering Committee THRACE, Investigator enrolling center           | HERMES collaborators                                                                       |
| Francis                           | Guillemin  |                       |                  | INSERM CIC-EC 1433                                      | Nancy, France                            | Steering Committee THRACE                                          | HERMES collaborators                                                                       |
| Alain                             | Bonafé     |                       |                  | Gui de Chauliac Hospital                                | Montpellier, France                      | Steering Committee THRACE, Investigator enrolling center           | HERMES collaborators                                                                       |
| Xavier                            | Leclerc    |                       |                  | University Hospital of Lille                            | Lille, France                            | Steering Committee THRACE, Investigator enrolling center           | HERMES collaborators                                                                       |
| Serge                             | Timsit     |                       |                  |                                                         | Brest, France                            | DSMB THRACE                                                        | HERMES collaborators                                                                       |
| Mathieu                           | Zuber      |                       |                  |                                                         | Paris, France                            | DSMB THRACE                                                        | HERMES collaborators                                                                       |
| Didier                            | Dormont    |                       |                  |                                                         | Paris, France                            | DSMB THRACE                                                        | HERMES collaborators                                                                       |
| Luc                               | Picard     |                       |                  |                                                         | Nancy, France                            | DSMB THRACE                                                        | HERMES collaborators                                                                       |
| Jean-Luc                          | Novella    |                       |                  |                                                         | Reims, France                            | DSMB THRACE                                                        | HERMES collaborators                                                                       |
| Nadine                            | Petitpain  |                       |                  | University Hospital of Nancy                            | Nancy, France                            | Clinical Events committee THRACE                                   | HERMES collaborators                                                                       |
| Sébastien                         | Richard    |                       |                  | University Hospital of Nancy                            | Nancy, France                            | Clinical Events committee THRACE                                   | HERMES collaborators                                                                       |
| Romain                            | Bourcier   |                       |                  | University Hospital of Nantes                           | Nantes, France                           | Clinical Events committee THRACE                                   | HERMES collaborators                                                                       |
| Sébastien                         | Soize      |                       |                  | University Hospital of Reims                            | Reims, France                            | Imaging Core Laboratory THRACE                                     | HERMES collaborators                                                                       |

## Supplemental Online Content: Nonauthor Collaborators

\*First name, last name, and suffix (if applicable) are required and will appear in PubMed.

| *First Name and Middle Initial(s) | *Last Name       | *Suffix (eg, Jr, III) | Academic Degrees | Institution                                                                   | Location (city, state/province, country) | Role or Contribution, eg, chair, principal investigator       | Group (if more than 1 Group listed in the byline) and/or Subgroup (eg, Steering Committee) |
|-----------------------------------|------------------|-----------------------|------------------|-------------------------------------------------------------------------------|------------------------------------------|---------------------------------------------------------------|--------------------------------------------------------------------------------------------|
| Hélène                            | Raoult           |                       |                  | University Hospital of Rennes                                                 | Rennes, France                           | Imaging Core Laboratory THRACE, Investigator enrolling center | HERMES collaborators                                                                       |
| Marie                             | Tisserand        |                       |                  | Sainte-Anne Hospital and Paris-Descartes University                           | Paris-Sainte Anne, France                | Imaging Core Laboratory THRACE                                | HERMES collaborators                                                                       |
| Olivier                           | Naggara          |                       |                  | Sainte-Anne Hospital and Paris-Descartes University                           | Paris-Sainte Anne, France                | Imaging Core Laboratory THRACE, Investigator enrolling center | HERMES collaborators                                                                       |
| Frédéric                          | Clarencon        |                       |                  | Pitié-Salpêtrière Hospital Group and Paris 6 University—Pierre et Marie Curie | Paris-Salpêtrière, France                | Imaging Core Laboratory THRACE, Investigator enrolling center | HERMES collaborators                                                                       |
| Anne-Laure                        | Derelle          |                       |                  | University Hospital of Nancy                                                  | Nancy, France                            | Imaging Core Laboratory THRACE, Investigator enrolling center | HERMES collaborators                                                                       |
| René                              | Axionnat         |                       |                  | University Hospital of Nancy                                                  | Nancy, France                            | Thrombectomy systems Validation Committee THRACE              | HERMES collaborators                                                                       |
| Pierre-Alexandre                  | Baillot          |                       |                  | University Hospital of Nancy                                                  | Nancy, France                            | Investigator enrolling site THRACE                            | HERMES collaborators                                                                       |
| Charlotte                         | Barbier          |                       |                  | University Hospital of Nancy                                                  | Nancy, France                            | Investigator enrolling center THRACE                          | HERMES collaborators                                                                       |
| Jean-Christophie                  | Lacour           |                       |                  | University Hospital of Nancy                                                  | Nancy, France                            | Investigator enrolling center THRACE                          | HERMES collaborators                                                                       |
| Nelly                             | Agrinier         |                       |                  | University of Lorraine and University Hospital of Nancy                       | Nancy, France                            |                                                               | HERMES collaborators                                                                       |
| Serge                             | Bakchine         |                       |                  | University of Reims                                                           | Reims, France                            | Investigator enrolling center THRACE                          | HERMES collaborators                                                                       |
| Flore                             | Baronnet-Chauvet |                       |                  | Pitié-Salpêtrière Hospital Group and Paris 6 University—Pierre et Marie Curie | Paris, France                            | Investigator enrolling center THRACE                          | HERMES collaborators                                                                       |

## Supplemental Online Content: Nonauthor Collaborators

\*First name, last name, and suffix (if applicable) are required and will appear in PubMed.

| *First Name and Middle Initial(s) | *Last Name       | *Suffix (eg, Jr, III) | Academic Degrees | Institution                                             | Location (city, state/province, country) | Role or Contribution, eg, chair, principal investigator | Group (if more than 1 Group listed in the byline) and/or Subgroup (eg, Steering Committee) |
|-----------------------------------|------------------|-----------------------|------------------|---------------------------------------------------------|------------------------------------------|---------------------------------------------------------|--------------------------------------------------------------------------------------------|
| Marine                            | Beaumont         |                       |                  | University of Lorraine and University Hospital of Nancy | Nancy, France                            |                                                         | HERMES collaborators                                                                       |
| Yannick                           | Bejot            |                       |                  | University Hospital of Dijon                            | Dijon, France                            | Investigator enrolling center THRACE                    | HERMES collaborators                                                                       |
| Jerôme                            | Berge            |                       |                  | University of Bordeaux                                  | Bordeaux, France                         | Investigator enrolling center THRACE                    | HERMES collaborators                                                                       |
| Marc                              | Bintner          |                       |                  | Sud-Reunion Hospital Group                              | Saint Pierre, France                     | Investigator enrolling center THRACE                    | HERMES collaborators                                                                       |
| Tae Hee                           | Cho              |                       |                  | University Hospital of Lyon                             | Lyon, France                             | Investigator enrolling center THRACE                    | HERMES collaborators                                                                       |
| Julien                            | Cogez            |                       |                  | University Hospital of Caen                             | Caen, France                             | Investigator enrolling center THRACE                    | HERMES collaborators                                                                       |
| Charlotte                         | Cordonnier       |                       |                  | University Hospital of Lille                            | Lille, France                            | Investigator enrolling center THRACE                    | HERMES collaborators                                                                       |
| Christian                         | Denier           |                       |                  | University Hospital of Bicêtre                          | Le Kremlin-Bicêtre, France               | Investigator enrolling center THRACE                    | HERMES collaborators                                                                       |
| Olivier                           | Detante          |                       |                  | University Hospital of Grenoble                         | Grenoble, France                         | Investigator enrolling center THRACE                    | HERMES collaborators                                                                       |
| Anthony                           | Faivre           |                       |                  | Hôpital d'Instruction des Armées                        | Toulon, France                           | Investigator enrolling center THRACE                    | HERMES collaborators                                                                       |
| Anne                              | Ferrier          |                       |                  | University Hospital Gabriel-Montpied                    | Clermont-Ferrand, France                 | Investigator enrolling center THRACE                    | HERMES collaborators                                                                       |
| Laetitia                          | Gimenez          |                       |                  | University Hospital of Limoges                          | Limoges, France                          | Investigator enrolling center THRACE                    | HERMES collaborators                                                                       |
| Sophie                            | Godard Ducceschi |                       |                  | University Hospital of Angers                           | Angers, France                           | Investigator enrolling center THRACE                    | HERMES collaborators                                                                       |
| Benoît                            | Guillon          |                       |                  | University Hospital of Nantes                           | Nantes, France                           | Investigator enrolling center THRACE                    | HERMES collaborators                                                                       |
| Emmanuel                          | Houdart          |                       |                  | University Hospital Lariboisière                        | Paris, France                            | Investigator enrolling center THRACE                    | HERMES collaborators                                                                       |
| Bertrand                          | Lapergue         |                       |                  | Foch Hospital                                           | Suresnes, France                         | Investigator enrolling center THRACE                    | HERMES collaborators                                                                       |

## Supplemental Online Content: Nonauthor Collaborators

\*First name, last name, and suffix (if applicable) are required and will appear in PubMed.

| *First Name and Middle Initial(s) | *Last Name  | *Suffix (eg, Jr, III) | Academic Degrees | Institution                           | Location (city, state/province, country) | Role or Contribution, eg, chair, principal investigator | Group (if more than 1 Group listed in the byline) and/or Subgroup (eg, Steering Committee) |
|-----------------------------------|-------------|-----------------------|------------------|---------------------------------------|------------------------------------------|---------------------------------------------------------|--------------------------------------------------------------------------------------------|
| Raul Mariano                      | Musacchio   |                       |                  | Pasteur Hospital                      | Colmar, France                           | Investigator enrolling center THRACE                    | HERMES collaborators                                                                       |
| Jean-Philippe                     | Neau        |                       |                  | University Hospital of Poitiers       | Poitiers, France                         | Investigator enrolling center THRACE                    | HERMES collaborators                                                                       |
| Michaël                           | Obadia      |                       |                  | Rothschild Ophtalmological Foundation | Paris, France                            | Investigator enrolling center THRACE                    | HERMES collaborators                                                                       |
| Anne                              | Pasco-Papon |                       |                  | University Hospital of Angers         | Angers, France                           | Investigator enrolling center THRACE                    | HERMES collaborators                                                                       |
| Michel                            | Piotin      |                       |                  | Rothschild Ophtalmological Foundation | Paris, France                            | Investigator enrolling center THRACE                    | HERMES collaborators                                                                       |
| Laurent                           | Pierot      |                       |                  | University Hospital of Reims          | Reims, France                            | Investigator enrolling center THRACE                    | HERMES collaborators                                                                       |
| Frederic                          | Ricolfi     |                       |                  | University Hospital of Dijon          | Dijon, France                            | Investigator enrolling center THRACE                    | HERMES collaborators                                                                       |
| Thomas                            | Ronziere    |                       |                  | University Hospital of Rennes         | Rennes, France                           | Investigator enrolling center THRACE                    | HERMES collaborators                                                                       |
| Guillaume                         | Saliou      |                       |                  | University Hospital of Bicêtre        | Le Kremlin-Bicêtre, France               | Investigator enrolling center THRACE                    | HERMES collaborators                                                                       |
| Igor                              | Sibon       |                       |                  | University Hospital of Bordeaux       | Bordeaux, France                         | Investigator enrolling center THRACE                    | HERMES collaborators                                                                       |
| Jacques                           | Sedat       |                       |                  | University Hospital of Nice           | Nice, France                             | Investigator enrolling center THRACE                    | HERMES collaborators                                                                       |
| Christian                         | Stapf       |                       |                  | University Hospital Lariboisière      | Paris, France                            | Investigator enrolling center THRACE                    | HERMES collaborators                                                                       |
| Laurent                           | Suissa      |                       |                  | University Hospital of Nice           | Nice, France                             | Investigator enrolling center THRACE                    | HERMES collaborators                                                                       |
| Francis                           | Turjman     |                       |                  | University Hospital of Lyon           | Lyon, France                             | Investigator enrolling center THRACE                    | HERMES collaborators                                                                       |
| Stephane                          | Velasco     |                       |                  | University Hospital of Poitiers       | Poitiers, France                         | Investigator enrolling center THRACE                    | HERMES collaborators                                                                       |

## Supplemental Online Content: Nonauthor Collaborators

\*First name, last name, and suffix (if applicable) are required and will appear in PubMed.

| *First Name and Middle Initial(s) | *Last Name | *Suffix (eg, Jr, III) | Academic Degrees | Institution                                                                   | Location (city, state/province, country) | Role or Contribution, eg, chair, principal investigator | Group (if more than 1 Group listed in the byline) and/or Subgroup (eg, Steering Committee) |
|-----------------------------------|------------|-----------------------|------------------|-------------------------------------------------------------------------------|------------------------------------------|---------------------------------------------------------|--------------------------------------------------------------------------------------------|
| Yves                              | Samson     |                       |                  | Pitié-Salpêtrière Hospital Group and Paris 6 University—Pierre et Marie Curie | Paris, France                            | Investigator enrolling center THRACE                    | HERMES collaborators                                                                       |
| Nader                             | Sourour    |                       |                  | Pitié-Salpêtrière Hospital Group and Paris 6 University—Pierre et Marie Curie | Paris, France                            | Investigator enrolling center THRACE                    | HERMES collaborators                                                                       |
| Sophie                            | Crozier    |                       |                  | Pitié-Salpêtrière Hospital Group and Paris 6 University—Pierre et Marie Curie | Paris, France                            | Investigator enrolling center THRACE                    | HERMES collaborators                                                                       |
| Sandrine                          | Deltour    |                       |                  | Pitié-Salpêtrière Hospital Group and Paris 6 University—Pierre et Marie Curie | Paris, France                            | Investigator enrolling center THRACE                    | HERMES collaborators                                                                       |
| Federico                          | Di Maria   |                       |                  | Pitié-Salpêtrière Hospital Group and Paris 6 University—Pierre et Marie Curie | Paris, France                            | Investigator enrolling center THRACE                    | HERMES collaborators                                                                       |
| Raphael                           | Le Bouc    |                       |                  | Pitié-Salpêtrière Hospital Group and Paris 6 University—Pierre et Marie Curie | Paris, France                            | Investigator enrolling center THRACE                    | HERMES collaborators                                                                       |
| Anne                              | Leger      |                       |                  | Pitié-Salpêtrière Hospital Group and Paris 6 University—Pierre et Marie Curie | Paris, France                            | Investigator enrolling center THRACE                    | HERMES collaborators                                                                       |
| Gurkan                            | Mutlu      |                       |                  | Pitié-Salpêtrière Hospital Group and Paris 6 University—Pierre et Marie Curie | Paris, France                            | Investigator enrolling center THRACE                    | HERMES collaborators                                                                       |

## Supplemental Online Content: Nonauthor Collaborators

\*First name, last name, and suffix (if applicable) are required and will appear in PubMed.

| *First Name and Middle Initial(s) | *Last Name            | *Suffix (eg, Jr, III) | Academic Degrees | Institution                                                                   | Location (city, state/province, country) | Role or Contribution, eg, chair, principal investigator | Group (if more than 1 Group listed in the byline) and/or Subgroup (eg, Steering Committee) |
|-----------------------------------|-----------------------|-----------------------|------------------|-------------------------------------------------------------------------------|------------------------------------------|---------------------------------------------------------|--------------------------------------------------------------------------------------------|
| Charlotte                         | Rosso                 |                       |                  | Pitié-Salpêtrière Hospital Group and Paris 6 University—Pierre et Marie Curie | Paris, France                            | Investigator enrolling center THRACE                    | HERMES collaborators                                                                       |
| Zoltan                            | Szatmary              |                       |                  | Pitié-Salpêtrière Hospital Group and Paris 6 University—Pierre et Marie Curie | Paris, France                            | Investigator enrolling center THRACE                    | HERMES collaborators                                                                       |
| Marion                            | Yger                  |                       |                  | Pitié-Salpêtrière Hospital Group and Paris 6 University—Pierre et Marie Curie | Paris, France                            | Investigator enrolling center THRACE                    | HERMES collaborators                                                                       |
| Chiara                            | Zavanone              |                       |                  | Pitié-Salpêtrière Hospital Group and Paris 6 University—Pierre et Marie Curie | Paris, France                            | Investigator enrolling center THRACE                    | HERMES collaborators                                                                       |
| Nathalie                          | Caucheteux            |                       |                  | University of Reims                                                           | Reims, France                            | Investigator enrolling center THRACE                    | HERMES collaborators                                                                       |
| Laurent                           | Estrade               |                       |                  | University of Reims                                                           | Reims, France                            | Investigator enrolling center THRACE                    | HERMES collaborators                                                                       |
| Krzysztof                         | Kadziolka             |                       |                  | University of Reims                                                           | Reims, France                            | Investigator enrolling center THRACE                    | HERMES collaborators                                                                       |
| Alexandre                         | Leautaud              |                       |                  | University of Reims                                                           | Reims, France                            | Investigator enrolling center THRACE                    | HERMES collaborators                                                                       |
| Céline                            | Renkes                |                       |                  | University of Reims                                                           | Reims, France                            | Investigator enrolling center THRACE                    | HERMES collaborators                                                                       |
| Isabelle                          | Serre                 |                       |                  | University of Reims                                                           | Reims, France                            | Investigator enrolling center THRACE                    | HERMES collaborators                                                                       |
| Hubert                            | Desal                 |                       |                  | University Hospital of Nantes                                                 | Nantes, France                           | Investigator enrolling center THRACE                    | HERMES collaborators                                                                       |
| Claire                            | Boutoleau-Bretonniere |                       |                  | University Hospital of Nantes                                                 | Nantes, France                           | Investigator enrolling center THRACE                    | HERMES collaborators                                                                       |

## Supplemental Online Content: Nonauthor Collaborators

\*First name, last name, and suffix (if applicable) are required and will appear in PubMed.

| *First Name and Middle Initial(s) | *Last Name            | *Suffix (eg, Jr, III) | Academic Degrees | Institution                   | Location (city, state/province, country) | Role or Contribution, eg, chair, principal investigator | Group (if more than 1 Group listed in the byline) and/or Subgroup (eg, Steering Committee) |
|-----------------------------------|-----------------------|-----------------------|------------------|-------------------------------|------------------------------------------|---------------------------------------------------------|--------------------------------------------------------------------------------------------|
| Benjamin                          | Daumas-Duport         |                       |                  | University Hospital of Nantes | Nantes, France                           | Investigator enrolling center THRACE                    | HERMES collaborators                                                                       |
| Solène                            | De Gaalon             |                       |                  | University Hospital of Nantes | Nantes, France                           | Investigator enrolling center THRACE                    | HERMES collaborators                                                                       |
| Pascal                            | Derkinderen           |                       |                  | University Hospital of Nantes | Nantes, France                           | Investigator enrolling center THRACE                    | HERMES collaborators                                                                       |
| Sarah                             | Evain                 |                       |                  | University Hospital of Nantes | Nantes, France                           | Investigator enrolling center THRACE                    | HERMES collaborators                                                                       |
| Fanny                             | Herisson              |                       |                  | University Hospital of Nantes | Nantes, France                           | Investigator enrolling center THRACE                    | HERMES collaborators                                                                       |
| David-Axel                        | Laplaud               |                       |                  | University Hospital of Nantes | Nantes, France                           | Investigator enrolling center THRACE                    | HERMES collaborators                                                                       |
| Thibaud                           | Lebouvier             |                       |                  | University Hospital of Nantes | Nantes, France                           | Investigator enrolling center THRACE                    | HERMES collaborators                                                                       |
| Alina                             | Lintia-Gaultier       |                       |                  | University Hospital of Nantes | Nantes, France                           | Investigator enrolling center THRACE                    | HERMES collaborators                                                                       |
| Hélène                            | Poucllet-Courtemanche |                       |                  | University Hospital of Nantes | Nantes, France                           | Investigator enrolling center THRACE                    | HERMES collaborators                                                                       |
| Tiphaine                          | Rouaud                |                       |                  | University Hospital of Nantes | Nantes, France                           | Investigator enrolling center THRACE                    | HERMES collaborators                                                                       |
| Violaine                          | Rouaud Jaffrenou      |                       |                  | University Hospital of Nantes | Nantes, France                           | Investigator enrolling center THRACE                    | HERMES collaborators                                                                       |
| Aurélia                           | Schunck               |                       |                  | University Hospital of Nantes | Nantes, France                           | Investigator enrolling center THRACE                    | HERMES collaborators                                                                       |
| Mathieu                           | Sevin                 |                       |                  | University Hospital of Nantes | Nantes, France                           | Investigator enrolling center THRACE                    | HERMES collaborators                                                                       |
| Fredereque                        | Toulgoat              |                       |                  | University Hospital of Nantes | Nantes, France                           | Investigator enrolling center THRACE                    | HERMES collaborators                                                                       |
| Sandrine                          | Wiertlewski           |                       |                  | University Hospital of Nantes | Nantes, France                           | Investigator enrolling center THRACE                    | HERMES collaborators                                                                       |



## Supplemental Online Content: Nonauthor Collaborators

\*First name, last name, and suffix (if applicable) are required and will appear in PubMed.

| *First Name and Middle Initial(s) | *Last Name           | *Suffix (eg, Jr, III) | Academic Degrees | Institution                                         | Location (city, state/province, country) | Role or Contribution, eg, chair, principal investigator | Group (if more than 1 Group listed in the byline) and/or Subgroup (eg, Steering Committee) |
|-----------------------------------|----------------------|-----------------------|------------------|-----------------------------------------------------|------------------------------------------|---------------------------------------------------------|--------------------------------------------------------------------------------------------|
| Jean-Yves                         | Gauvrit              |                       |                  | University Hospital of Rennes                       | Rennes, France                           | Investigator enrolling center THRACE                    | HERMES collaborators                                                                       |
| Vincent                           | Cahagne              |                       |                  | University Hospital of Rennes                       | Rennes, France                           | Investigator enrolling center THRACE                    | HERMES collaborators                                                                       |
| Jean-Christophie                  | Ferre                |                       |                  | University Hospital of Rennes                       | Rennes, France                           | Investigator enrolling center THRACE                    | HERMES collaborators                                                                       |
| Jean-François                     | Pinel                |                       |                  | University Hospital of Rennes                       | Rennes, France                           | Investigator enrolling center THRACE                    | HERMES collaborators                                                                       |
| Jean-François                     | Meder                |                       |                  | Sainte-Anne Hospital and Paris-Descartes University | Paris-Sainte Anne, France                | Investigator enrolling center THRACE                    | HERMES collaborators                                                                       |
| Amen-Adam                         | Al Najjar-Carpentier |                       |                  | Sainte-Anne Hospital and Paris-Descartes University | Paris-Sainte Anne, France                | Investigator enrolling center THRACE                    | HERMES collaborators                                                                       |
| Julia                             | Birchenall           |                       |                  | Sainte-Anne Hospital and Paris-Descartes University | Paris-Sainte Anne, France                | Investigator enrolling center THRACE                    | HERMES collaborators                                                                       |
| Eric                              | Bodiguel             |                       |                  | Sainte-Anne Hospital and Paris-Descartes University | Paris-Sainte Anne, France                | Investigator enrolling center THRACE                    | HERMES collaborators                                                                       |
| David                             | Calvet               |                       |                  | Sainte-Anne Hospital and Paris-Descartes University | Paris-Sainte Anne, France                | Investigator enrolling center THRACE                    | HERMES collaborators                                                                       |
| Valérie                           | Domigo               |                       |                  | Sainte-Anne Hospital and Paris-Descartes University | Paris-Sainte Anne, France                | Investigator enrolling center THRACE                    | HERMES collaborators                                                                       |
| Sylvie                            | Godon-Hardy          |                       |                  | Sainte-Anne Hospital and Paris-Descartes University | Paris-Sainte Anne, France                | Investigator enrolling center THRACE                    | HERMES collaborators                                                                       |
| Vincent                           | Guiraud              |                       |                  | Sainte-Anne Hospital and Paris-Descartes University | Paris-Sainte Anne, France                | Investigator enrolling center THRACE                    | HERMES collaborators                                                                       |
| Catherine                         | Lamy                 |                       |                  | Sainte-Anne Hospital and Paris-Descartes University | Paris-Sainte Anne, France                | Investigator enrolling center THRACE                    | HERMES collaborators                                                                       |
| Loubna                            | Majhadi              |                       |                  | Sainte-Anne Hospital and Paris-Descartes University | Paris-Sainte Anne, France                | Investigator enrolling center THRACE                    | HERMES collaborators                                                                       |
| Ludovic                           | Morin                |                       |                  | Sainte-Anne Hospital and Paris-Descartes University | Paris-Sainte Anne, France                | Investigator enrolling center THRACE                    | HERMES collaborators                                                                       |
| Denis                             | Trystam              |                       |                  | Sainte-Anne Hospital and Paris-Descartes University | Paris-Sainte Anne, France                | Investigator enrolling center THRACE                    | HERMES collaborators                                                                       |

## Supplemental Online Content: Nonauthor Collaborators

\*First name, last name, and suffix (if applicable) are required and will appear in PubMed.

| *First Name and Middle Initial(s) | *Last Name  | *Suffix (eg, Jr, III) | Academic Degrees | Institution                                         | Location (city, state/province, country) | Role or Contribution, eg, chair, principal investigator | Group (if more than 1 Group listed in the byline) and/or Subgroup (eg, Steering Committee) |
|-----------------------------------|-------------|-----------------------|------------------|-----------------------------------------------------|------------------------------------------|---------------------------------------------------------|--------------------------------------------------------------------------------------------|
| Guillaume                         | Turc        |                       |                  | Sainte-Anne Hospital and Paris-Descartes University | Paris-Sainte Anne, France                | Investigator enrolling center THRACE                    | HERMES collaborators                                                                       |
| Xavier                            | Barreau     |                       |                  | University of Bordeaux                              | Bordeaux, France                         | Investigator enrolling center THRACE                    | HERMES collaborators                                                                       |
| François                          | Rouanet     |                       |                  | University of Bordeaux                              | Bordeaux, France                         | Investigator enrolling center THRACE                    | HERMES collaborators                                                                       |
| Sabrina                           | Debruxelles |                       |                  | University of Bordeaux                              | Bordeaux, France                         | Investigator enrolling center THRACE                    | HERMES collaborators                                                                       |
| Annabelle                         | Kazadi      |                       |                  | University of Bordeaux                              | Bordeaux, France                         | Investigator enrolling center THRACE                    | HERMES collaborators                                                                       |
| Pauline                           | Renou       |                       |                  | University of Bordeaux                              | Bordeaux, France                         | Investigator enrolling center THRACE                    | HERMES collaborators                                                                       |
| Olivier                           | Fleury      |                       |                  | University of Bordeaux                              | Bordeaux, France                         | Investigator enrolling center THRACE                    | HERMES collaborators                                                                       |
| Frédéric                          | Dubas       |                       |                  | University Hospital of Angers                       | Angers, France                           | Investigator enrolling center THRACE                    | HERMES collaborators                                                                       |
| Jildaz                            | Caroff      |                       |                  | University Hospital of Angers                       | Angers, France                           | Investigator enrolling center THRACE                    | HERMES collaborators                                                                       |
| Marie-Aurélié                     | Hamon       |                       |                  | University Hospital of Angers                       | Angers, France                           | Investigator enrolling center THRACE                    | HERMES collaborators                                                                       |
| Alderic                           | Lecluse     |                       |                  | University Hospital of Angers                       | Angers, France                           | Investigator enrolling center THRACE                    | HERMES collaborators                                                                       |
| Guillaume                         | Marc        |                       |                  | University Hospital of Angers                       | Angers, France                           | Investigator enrolling center THRACE                    | HERMES collaborators                                                                       |
| Maurice                           | Giroud      |                       |                  | University Hospital of Dijon                        | Dijon, France                            | Investigator enrolling center THRACE                    | HERMES collaborators                                                                       |
| Adrien                            | Chavent     |                       |                  | University Hospital of Dijon                        | Dijon, France                            | Investigator enrolling center THRACE                    | HERMES collaborators                                                                       |
| Arnaud                            | Gentil      |                       |                  | University Hospital of Dijon                        | Dijon, France                            | Investigator enrolling center THRACE                    | HERMES collaborators                                                                       |
| Apolline                          | Kazemi      |                       |                  | University Hospital of Dijon                        | Dijon, France                            | Investigator enrolling center THRACE                    | HERMES collaborators                                                                       |

## Supplemental Online Content: Nonauthor Collaborators

\*First name, last name, and suffix (if applicable) are required and will appear in PubMed.

| *First Name and Middle Initial(s) | *Last Name    | *Suffix (eg, Jr, III) | Academic Degrees | Institution                      | Location (city, state/province, country) | Role or Contribution, eg, chair, principal investigator | Group (if more than 1 Group listed in the byline) and/or Subgroup (eg, Steering Committee) |
|-----------------------------------|---------------|-----------------------|------------------|----------------------------------|------------------------------------------|---------------------------------------------------------|--------------------------------------------------------------------------------------------|
| Guy-Victor                        | Osseby        |                       |                  | University Hospital of Dijon     | Dijon, France                            | Investigator enrolling center THRACE                    | HERMES collaborators                                                                       |
| Charlotte                         | Voguet        |                       |                  | University Hospital of Dijon     | Dijon, France                            | Investigator enrolling center THRACE                    | HERMES collaborators                                                                       |
| Marie-Hélène                      | Mahagne       |                       |                  | University Hospital of Nice      | Nice, France                             | Investigator enrolling center THRACE                    | HERMES collaborators                                                                       |
| Yves                              | Chau          |                       |                  | University Hospital of Nice      | Nice, France                             | Investigator enrolling center THRACE                    | HERMES collaborators                                                                       |
| Sylvain                           | Lachaud       |                       |                  | University Hospital of Nice      | Nice, France                             | Investigator enrolling center THRACE                    | HERMES collaborators                                                                       |
| Frédérique Buffon                 | Porcher       |                       |                  | University Hospital Lariboisière | Paris, France                            | Investigator enrolling center THRACE                    | HERMES collaborators                                                                       |
| Hugues                            | Chabriat      |                       |                  | University Hospital Lariboisière | Paris, France                            | Investigator enrolling center THRACE                    | HERMES collaborators                                                                       |
| Pierre                            | Guedin        |                       |                  | University Hospital Lariboisière | Paris, France                            | Investigator enrolling center THRACE                    | HERMES collaborators                                                                       |
| Dominique                         | Herve         |                       |                  | University Hospital Lariboisière | Paris, France                            | Investigator enrolling center THRACE                    | HERMES collaborators                                                                       |
| Eric                              | Jouvent       |                       |                  | University Hospital Lariboisière | Paris, France                            | Investigator enrolling center THRACE                    | HERMES collaborators                                                                       |
| Jérôme                            | Mawet         |                       |                  | University Hospital Lariboisière | Paris, France                            | Investigator enrolling center THRACE                    | HERMES collaborators                                                                       |
| Jean-Pierre                       | Saint-Maurice |                       |                  | University Hospital Lariboisière | Paris, France                            | Investigator enrolling center THRACE                    | HERMES collaborators                                                                       |
| Hans-Martin                       | Schneble      |                       |                  | University Hospital Lariboisière | Paris, France                            | Investigator enrolling center THRACE                    | HERMES collaborators                                                                       |
| Norbert                           | Nighoghossian |                       |                  | University Hospital of Lyon      | Lyon, France                             | Investigator enrolling center THRACE                    | HERMES collaborators                                                                       |
| Nadia-Nawel                       | Berhouné      |                       |                  | University Hospital of Lyon      | Lyon, France                             | Investigator enrolling center THRACE                    | HERMES collaborators                                                                       |
| Françoise                         | Bouhour       |                       |                  | University Hospital of Lyon      | Lyon, France                             | Investigator enrolling center THRACE                    | HERMES collaborators                                                                       |

## Supplemental Online Content: Nonauthor Collaborators

\*First name, last name, and suffix (if applicable) are required and will appear in PubMed.

| *First Name and Middle Initial(s) | *Last Name      | *Suffix (eg, Jr, III) | Academic Degrees | Institution                           | Location (city, state/province, country) | Role or Contribution, eg, chair, principal investigator | Group (if more than 1 Group listed in the byline) and/or Subgroup (eg, Steering Committee) |
|-----------------------------------|-----------------|-----------------------|------------------|---------------------------------------|------------------------------------------|---------------------------------------------------------|--------------------------------------------------------------------------------------------|
| Laurent                           | DereX           |                       |                  | University Hospital of Lyon           | Lyon, France                             | Investigator enrolling center THRACE                    | HERMES collaborators                                                                       |
| Hélène                            | Gervais-Bernard |                       |                  | University Hospital of Lyon           | Lyon, France                             | Investigator enrolling center THRACE                    | HERMES collaborators                                                                       |
| Benjarmin                         | Gory            |                       |                  | University Hospital of Lyon           | Lyon, France                             | Investigator enrolling center THRACE                    | HERMES collaborators                                                                       |
| Luis                              | Manera          |                       |                  | University Hospital of Lyon           | Lyon, France                             | Investigator enrolling center THRACE                    | HERMES collaborators                                                                       |
| Laura                             | Mechtouff       |                       |                  | University Hospital of Lyon           | Lyon, France                             | Investigator enrolling center THRACE                    | HERMES collaborators                                                                       |
| Thomas                            | Ritzenthaler    |                       |                  | University Hospital of Lyon           | Lyon, France                             | Investigator enrolling center THRACE                    | HERMES collaborators                                                                       |
| Roberto                           | Riva            |                       |                  | University Hospital of Lyon           | Lyon, France                             | Investigator enrolling center THRACE                    | HERMES collaborators                                                                       |
| Fabrizio                          | Salaris Silvio  |                       |                  | University Hospital of Lyon           | Lyon, France                             | Investigator enrolling center THRACE                    | HERMES collaborators                                                                       |
| Caroline                          | Tilikete        |                       |                  | University Hospital of Lyon           | Lyon, France                             | Investigator enrolling center THRACE                    | HERMES collaborators                                                                       |
| Raphael                           | Blanc           |                       |                  | Rothschild Ophtalmological Foundation | Paris, France                            | Investigator enrolling center THRACE                    | HERMES collaborators                                                                       |
| Marion                            | Bruno Bartolini |                       |                  | Rothschild Ophtalmological Foundation | Paris, France                            | Investigator enrolling center THRACE                    | HERMES collaborators                                                                       |
| Antoine                           | Gueguen         |                       |                  | Rothschild Ophtalmological Foundation | Paris, France                            | Investigator enrolling center THRACE                    | HERMES collaborators                                                                       |
| Silvia                            | Pistocchi       |                       |                  | Rothschild Ophtalmological Foundation | Paris, France                            | Investigator enrolling center THRACE                    | HERMES collaborators                                                                       |
| Hocine                            | Redjem          |                       |                  | Rothschild Ophtalmological Foundation | Paris, France                            | Investigator enrolling center THRACE                    | HERMES collaborators                                                                       |
| Jacques                           | Drouineau       |                       |                  | University Hospital of Poitiers       | Poitiers, France                         | Investigator enrolling center THRACE                    | HERMES collaborators                                                                       |
| Gaëlle                            | Godeneche       |                       |                  | University Hospital of Poitiers       | Poitiers, France                         | Investigator enrolling center THRACE                    | HERMES collaborators                                                                       |

## Supplemental Online Content: Nonauthor Collaborators

\*First name, last name, and suffix (if applicable) are required and will appear in PubMed.

| *First Name and Middle Initial(s) | *Last Name      | *Suffix (eg, Jr, III) | Academic Degrees | Institution                          | Location (city, state/province, country) | Role or Contribution, eg, chair, principal investigator | Group (if more than 1 Group listed in the byline) and/or Subgroup (eg, Steering Committee) |
|-----------------------------------|-----------------|-----------------------|------------------|--------------------------------------|------------------------------------------|---------------------------------------------------------|--------------------------------------------------------------------------------------------|
| Matthias                          | Lamy            |                       |                  | University Hospital of Poitiers      | Poitiers, France                         | Investigator enrolling center THRACE                    | HERMES collaborators                                                                       |
| Emilia                            | Marsac          |                       |                  | University Hospital of Poitiers      | Poitiers, France                         | Investigator enrolling center THRACE                    | HERMES collaborators                                                                       |
| Pierre                            | Clavelou        |                       |                  | University Hospital Gabriel-Montpied | Clermont-Ferrand, France                 | Investigator enrolling center THRACE                    | HERMES collaborators                                                                       |
| Emmanuel                          | Chabert         |                       |                  | University Hospital Gabriel-Montpied | Clermont-Ferrand, France                 | Investigator enrolling center THRACE                    | HERMES collaborators                                                                       |
| Nathalie                          | Bourgois        |                       |                  | University Hospital Gabriel-Montpied | Clermont-Ferrand, France                 | Investigator enrolling center THRACE                    | HERMES collaborators                                                                       |
| Catherine                         | Cornut-Chauvinc |                       |                  | University Hospital Gabriel-Montpied | Clermont-Ferrand, France                 | Investigator enrolling center THRACE                    | HERMES collaborators                                                                       |
| Jean                              | Gabrillargues   |                       |                  | University Hospital Gabriel-Montpied | Clermont-Ferrand, France                 | Investigator enrolling center THRACE                    | HERMES collaborators                                                                       |
| Betty                             | Jean            |                       |                  | University Hospital Gabriel-Montpied | Clermont-Ferrand, France                 | Investigator enrolling center THRACE                    | HERMES collaborators                                                                       |
| Anna-Raquel                       | Marques         |                       |                  | University Hospital Gabriel-Montpied | Clermont-Ferrand, France                 | Investigator enrolling center THRACE                    | HERMES collaborators                                                                       |
| Nicolas                           | Vitello         |                       |                  | University Hospital Gabriel-Montpied | Clermont-Ferrand, France                 | Investigator enrolling center THRACE                    | HERMES collaborators                                                                       |
| Marianne                          | Barbieux        |                       |                  | University Hospital of Grenoble      | Grenoble, France                         | Investigator enrolling center THRACE                    | HERMES collaborators                                                                       |
| Kamel                             | Boubagra        |                       |                  | University Hospital of Grenoble      | Grenoble, France                         | Investigator enrolling center THRACE                    | HERMES collaborators                                                                       |
| Isabelle F.                       | Wiki            |                       |                  | University Hospital of Grenoble      | Grenoble, France                         | Investigator enrolling center THRACE                    | HERMES collaborators                                                                       |
| Katia                             | Garambois       |                       |                  | University Hospital of Grenoble      | Grenoble, France                         | Investigator enrolling center THRACE                    | HERMES collaborators                                                                       |
| Florence                          | Tahon           |                       |                  | University Hospital of Grenoble      | Grenoble, France                         | Investigator enrolling center THRACE                    | HERMES collaborators                                                                       |
| Vasdev                            | Ashok           |                       |                  | University Hospital of Grenoble      | Grenoble, France                         | Investigator enrolling center THRACE                    | HERMES collaborators                                                                       |

## Supplemental Online Content: Nonauthor Collaborators

\*First name, last name, and suffix (if applicable) are required and will appear in PubMed.

| *First Name and Middle Initial(s) | *Last Name  | *Suffix (eg, Jr, III) | Academic Degrees | Institution                     | Location (city, state/province, country) | Role or Contribution, eg, chair, principal investigator | Group (if more than 1 Group listed in the byline) and/or Subgroup (eg, Steering Committee) |
|-----------------------------------|-------------|-----------------------|------------------|---------------------------------|------------------------------------------|---------------------------------------------------------|--------------------------------------------------------------------------------------------|
| Charlotte                         | Voguet      |                       |                  | University Hospital of Grenoble | Grenoble, France                         | Investigator enrolling center THRACE                    | HERMES collaborators                                                                       |
| Oguzhan                           | Coskun      |                       |                  | Foch Hospital                   | Suresnes, France                         | Investigator enrolling center THRACE                    | HERMES collaborators                                                                       |
| Pierre                            | Guedin      |                       |                  | Foch Hospital                   | Suresnes, France                         | Investigator enrolling center THRACE                    | HERMES collaborators                                                                       |
| Georges                           | Rodesch     |                       |                  | Foch Hospital                   | Suresnes, France                         | Investigator enrolling center THRACE                    | HERMES collaborators                                                                       |
| Frédéric                          | Bourdain    |                       |                  | Foch Hospital                   | Suresnes, France                         | Investigator enrolling center THRACE                    | HERMES collaborators                                                                       |
| Serge                             | Evrard      |                       |                  | Foch Hospital                   | Suresnes, France                         | Investigator enrolling center THRACE                    | HERMES collaborators                                                                       |
| Philippe                          | Graveleau   |                       |                  | Foch Hospital                   | Suresnes, France                         | Investigator enrolling center THRACE                    | HERMES collaborators                                                                       |
| Jean Pierre                       | Decroix     |                       |                  | Foch Hospital                   | Suresnes, France                         | Investigator enrolling center THRACE                    | HERMES collaborators                                                                       |
| Adrien                            | Wang        |                       |                  | Foch Hospital                   | Suresnes, France                         | Investigator enrolling center THRACE                    | HERMES collaborators                                                                       |
| François                          | Sellal      |                       |                  | Pasteur Hospital                | Colmar, France                           | Investigator enrolling center THRACE                    | HERMES collaborators                                                                       |
| Guido                             | Ahle        |                       |                  | Pasteur Hospital                | Colmar, France                           | Investigator enrolling center THRACE                    | HERMES collaborators                                                                       |
| Gabriela                          | Carelli     |                       |                  | Pasteur Hospital                | Colmar, France                           | Investigator enrolling center THRACE                    | HERMES collaborators                                                                       |
| Marie-Hélène                      | Dugay       |                       |                  | Pasteur Hospital                | Colmar, France                           | Investigator enrolling center THRACE                    | HERMES collaborators                                                                       |
| Claude                            | Gaultier    |                       |                  | Pasteur Hospital                | Colmar, France                           | Investigator enrolling center THRACE                    | HERMES collaborators                                                                       |
| Ariel P.                          | Lebedeinsky |                       |                  | Pasteur Hospital                | Colmar, France                           | Investigator enrolling center THRACE                    | HERMES collaborators                                                                       |
| Lavinia                           | Lita        |                       |                  | Pasteur Hospital                | Colmar, France                           | Investigator enrolling center THRACE                    | HERMES collaborators                                                                       |

## Supplemental Online Content: Nonauthor Collaborators

\*First name, last name, and suffix (if applicable) are required and will appear in PubMed.

| *First Name and Middle Initial(s) | *Last Name            | *Suffix (eg, Jr, III) | Academic Degrees | Institution                    | Location (city, state/province, country) | Role or Contribution, eg, chair, principal investigator | Group (if more than 1 Group listed in the byline) and/or Subgroup (eg, Steering Committee) |
|-----------------------------------|-----------------------|-----------------------|------------------|--------------------------------|------------------------------------------|---------------------------------------------------------|--------------------------------------------------------------------------------------------|
| Catherine                         | Renglewicz-Destuynder |                       |                  | Pasteur Hospital               | Colmar, France                           | Investigator enrolling center THRACE                    | HERMES collaborators                                                                       |
| Alain                             | Tournade              |                       |                  | Pasteur Hospital               | Colmar, France                           | Investigator enrolling center THRACE                    | HERMES collaborators                                                                       |
| Françis                           | Vuillemet             |                       |                  | Pasteur Hospital               | Colmar, France                           | Investigator enrolling center THRACE                    | HERMES collaborators                                                                       |
| Francisco M.                      | Montoro               |                       |                  | University Hospital of Limoges | Limoges, France                          | Investigator enrolling center THRACE                    | HERMES collaborators                                                                       |
| Charbel                           | Mounayer              |                       |                  | University Hospital of Limoges | Limoges, France                          | Investigator enrolling center THRACE                    | HERMES collaborators                                                                       |
| Frederic                          | Faugeras              |                       |                  | University Hospital of Limoges | Limoges, France                          | Investigator enrolling center THRACE                    | HERMES collaborators                                                                       |
| Catherine                         | Labach                |                       |                  | University Hospital of Limoges | Limoges, France                          | Investigator enrolling center THRACE                    | HERMES collaborators                                                                       |
| Géraldine                         | Lautrette             |                       |                  | University Hospital of Limoges | Limoges, France                          | Investigator enrolling center THRACE                    | HERMES collaborators                                                                       |
| Guillaume                         | Saliou                |                       |                  | University Hospital of Bicêtre | Le Kremlin-Bicêtre, France               | Investigator enrolling center THRACE                    | HERMES collaborators                                                                       |
| Olivier                           | Chassin               |                       |                  | University Hospital of Bicêtre | Le Kremlin-Bicêtre, France               | Investigator enrolling center THRACE                    | HERMES collaborators                                                                       |
| Claire                            | Dussaule              |                       |                  | University Hospital of Bicêtre | Le Kremlin-Bicêtre, France               | Investigator enrolling center THRACE                    | HERMES collaborators                                                                       |
| Elsa                              | Melki                 |                       |                  | University Hospital of Bicêtre | Le Kremlin-Bicêtre, France               | Investigator enrolling center THRACE                    | HERMES collaborators                                                                       |
| Augustin                          | Ozanne                |                       |                  | University Hospital of Bicêtre | Le Kremlin-Bicêtre, France               | Investigator enrolling center THRACE                    | HERMES collaborators                                                                       |
| Francesco                         | Puccinelli            |                       |                  | University Hospital of Bicêtre | Le Kremlin-Bicêtre, France               | Investigator enrolling center THRACE                    | HERMES collaborators                                                                       |
| Marina                            | Sachet                |                       |                  | University Hospital of Bicêtre | Le Kremlin-Bicêtre, France               | Investigator enrolling center THRACE                    | HERMES collaborators                                                                       |
| Sarov                             | Mariana               |                       |                  | University Hospital of Bicêtre | Le Kremlin-Bicêtre, France               | Investigator enrolling center THRACE                    | HERMES collaborators                                                                       |

## Supplemental Online Content: Nonauthor Collaborators

\*First name, last name, and suffix (if applicable) are required and will appear in PubMed.

| *First Name and Middle Initial(s) | *Last Name         | *Suffix (eg, Jr, III) | Academic Degrees | Institution                     | Location (city, state/province, country) | Role or Contribution, eg, chair, principal investigator | Group (if more than 1 Group listed in the byline) and/or Subgroup (eg, Steering Committee) |
|-----------------------------------|--------------------|-----------------------|------------------|---------------------------------|------------------------------------------|---------------------------------------------------------|--------------------------------------------------------------------------------------------|
| Jean-François                     | Bonneville         |                       |                  | University Hospital of Besançon | Besançon France                          | Investigator enrolling center THRACE                    | HERMES collaborators                                                                       |
| Allessandra                       | Biondi             |                       |                  | University Hospital of Besançon | Besançon France                          | Investigator enrolling center THRACE                    | HERMES collaborators                                                                       |
| Elisabeth                         | De Bustos Medeiros |                       |                  | University Hospital of Besançon | Besançon France                          | Investigator enrolling center THRACE                    | HERMES collaborators                                                                       |
| Fabrice                           | Vuillier           |                       |                  | University Hospital of Besançon | Besançon France                          | Investigator enrolling center THRACE                    | HERMES collaborators                                                                       |
| Patrick                           | Courtheoux         |                       |                  | University Hospital of Caen     | Caen, France                             | Investigator enrolling center THRACE                    | HERMES collaborators                                                                       |
| Fausto                            | Viader             |                       |                  | University Hospital of Caen     | Caen, France                             | Investigator enrolling center THRACE                    | HERMES collaborators                                                                       |
| Marion                            | Apoil-Brissard     |                       |                  | University Hospital of Caen     | Caen, France                             | Investigator enrolling center THRACE                    | HERMES collaborators                                                                       |
| Mathieu                           | Bataille           |                       |                  | University Hospital of Caen     | Caen, France                             | Investigator enrolling center THRACE                    | HERMES collaborators                                                                       |
| Anne-Laure                        | Bonnet             |                       |                  | University Hospital of Caen     | Caen, France                             | Investigator enrolling center THRACE                    | HERMES collaborators                                                                       |
| Emmanuel                          | Touze              |                       |                  | University Hospital of Caen     | Caen, France                             | Investigator enrolling center THRACE                    | HERMES collaborators                                                                       |
| Didier                            | Leys               |                       |                  | University Hospital of Lille    | Lille, France                            | Investigator enrolling center THRACE                    | HERMES collaborators                                                                       |
| Mohamed                           | Aggour             |                       |                  | University Hospital of Lille    | Lille, France                            | Investigator enrolling center THRACE                    | HERMES collaborators                                                                       |
| Pierre                            | Aguettaz           |                       |                  | University Hospital of Lille    | Lille, France                            | Investigator enrolling center THRACE                    | HERMES collaborators                                                                       |
| Marie                             | Bodenant           |                       |                  | University Hospital of Lille    | Lille, France                            | Investigator enrolling center THRACE                    | HERMES collaborators                                                                       |
| Dominique                         | Deplanque          |                       |                  | University Hospital of Lille    | Lille, France                            | Investigator enrolling center THRACE                    | HERMES collaborators                                                                       |
| Marie                             | Giot               |                       |                  | University Hospital of Lille    | Lille, France                            | Investigator enrolling center THRACE                    | HERMES collaborators                                                                       |



## Supplemental Online Content: Nonauthor Collaborators

\*First name, last name, and suffix (if applicable) are required and will appear in PubMed.

| *First Name and Middle Initial(s) | *Last Name | *Suffix (eg, Jr, III) | Academic Degrees | Institution                      | Location (city, state/province, country) | Role or Contribution, eg, chair, principal investigator  | Group (if more than 1 Group listed in the byline) and/or Subgroup (eg, Steering Committee) |
|-----------------------------------|------------|-----------------------|------------------|----------------------------------|------------------------------------------|----------------------------------------------------------|--------------------------------------------------------------------------------------------|
| Hilde                             | Henon      |                       |                  | University Hospital of Lille     | Lille, France                            | Investigator enrolling center THRACE                     | HERMES collaborators                                                                       |
| Erwah                             | Kalsoum    |                       |                  | University Hospital of Lille     | Lille, France                            | Investigator enrolling center THRACE                     | HERMES collaborators                                                                       |
| Christian                         | Lucas      |                       |                  | University Hospital of Lille     | Lille, France                            | Investigator enrolling center THRACE                     | HERMES collaborators                                                                       |
| Jean-Pierre                       | Pruvo      |                       |                  | University Hospital of Lille     | Lille, France                            | Investigator enrolling center THRACE                     | HERMES collaborators                                                                       |
| Paolo                             | Zuniga     |                       |                  | University Hospital of Lille     | Lille, France                            | Investigator enrolling center THRACE                     | HERMES collaborators                                                                       |
| Caroline                          | Arquizan   |                       |                  | Gui de Chauliac Hospital         | Montpellier, France                      | Steering Committee THRACE, Investigator enrolling center | HERMES collaborators                                                                       |
| Vincent                           | Costalat   |                       |                  | Gui de Chauliac Hospital         | Montpellier, France                      | Steering Committee THRACE, Investigator enrolling center | HERMES collaborators                                                                       |
| Paolo                             | Machi      |                       |                  | Gui de Chauliac Hospital         | Montpellier, France                      | Steering Committee THRACE, Investigator enrolling center | HERMES collaborators                                                                       |
| Isabelle                          | Mourand    |                       |                  | Gui de Chauliac Hospital         | Montpellier, France                      | Steering Committee THRACE, Investigator enrolling center | HERMES collaborators                                                                       |
| Carlos A.                         | Riquelme   |                       |                  | Gui de Chauliac Hospital         | Montpellier, France                      | Steering Committee THRACE, Investigator enrolling center | HERMES collaborators                                                                       |
| Pierre                            | Bounolleau |                       |                  | Hôpital d'Instruction des Armées | Toulon, France                           | Investigator enrolling center THRACE                     | HERMES collaborators                                                                       |
| Charles                           | Arteaga    |                       |                  | Hôpital d'Instruction des Armées | Toulon, France                           | Investigator enrolling center THRACE                     | HERMES collaborators                                                                       |
| Patrice                           | Tournebize |                       |                  | Sud-Reunion Hospital Group       | Saint Pierre, France                     | Investigator enrolling center THRACE                     | HERMES collaborators                                                                       |

## Supplemental Online Content: Nonauthor Collaborators

\*First name, last name, and suffix (if applicable) are required and will appear in PubMed.

| *First Name and Middle Initial(s) | *Last Name         | *Suffix (eg, Jr, III) | Academic Degrees | Institution                                               | Location (city, state/province, country) | Role or Contribution, eg, chair, principal investigator | Group (if more than 1 Group listed in the byline) and/or Subgroup (eg, Steering Committee) |
|-----------------------------------|--------------------|-----------------------|------------------|-----------------------------------------------------------|------------------------------------------|---------------------------------------------------------|--------------------------------------------------------------------------------------------|
| Cyril                             | Charlin            |                       |                  | Sud-Reunion Hospital Group                                | Saint Pierre, France                     | Investigator enrolling center THRACE                    | HERMES collaborators                                                                       |
| Françoise                         | Darcel             |                       |                  | Sud-Reunion Hospital Group                                | Saint Pierre, France                     | Investigator enrolling center THRACE                    | HERMES collaborators                                                                       |
| Pascale                           | Gauthier-Lasalarie |                       |                  | Sud-Reunion Hospital Group                                | Saint Pierre, France                     | Investigator enrolling center THRACE                    | HERMES collaborators                                                                       |
| Marcia                            | Jeremenko          |                       |                  | Sud-Reunion Hospital Group                                | Saint Pierre, France                     | Investigator enrolling center THRACE                    | HERMES collaborators                                                                       |
| Servane                           | Mouton             |                       |                  | Sud-Reunion Hospital Group                                | Saint Pierre, France                     | Investigator enrolling center THRACE                    | HERMES collaborators                                                                       |
| Jean-Baptiste                     | Zerlauth           |                       |                  | Sud-Reunion Hospital Group                                | Saint Pierre, France                     | Investigator enrolling center THRACE                    | HERMES collaborators                                                                       |
| Chantal                           | Lamy               |                       |                  | CHU Amiens                                                |                                          | Investigator non-enrolling center THRACE                | HERMES collaborators                                                                       |
| Hervé                             | Deramond           |                       |                  | CHU Amiens                                                |                                          | Investigator non-enrolling center THRACE                | HERMES collaborators                                                                       |
| Hassan                            | Hosseini           |                       |                  | CHU Creteil                                               |                                          | Investigator non-enrolling center THRACE                | HERMES collaborators                                                                       |
| André                             | Gaston             |                       |                  | CHU Creteil                                               |                                          | Investigator non-enrolling center THRACE                | HERMES collaborators                                                                       |
| Francis-Guy                       | Barral             |                       |                  | CHU Saint Etienne                                         |                                          | Investigator non-enrolling center THRACE                | HERMES collaborators                                                                       |
| Pierre                            | Garnier            |                       |                  | CHU Saint Etienne                                         |                                          | Investigator non-enrolling center THRACE                | HERMES collaborators                                                                       |
| Rémy W.V.                         | Beaujeux           |                       |                  | CHU Strasbourg                                            |                                          | Investigator non-enrolling center THRACE                | HERMES collaborators                                                                       |
| Denis D.S.                        | Herbreteau         |                       |                  | CHU Tours                                                 |                                          | Investigator non-enrolling center THRACE                | HERMES collaborators                                                                       |
| Alicia                            | Murray             |                       |                  | University of Glasgow, Queen Elizabeth University Hospita | Glasgow, UK                              | Trial coordinator PISTE                                 | HERMES collaborators                                                                       |
| Gary                              | Ford               |                       |                  |                                                           |                                          | Trial Steering Committee (chair) PISTE                  | HERMES collaborators                                                                       |

## Supplemental Online Content: Nonauthor Collaborators

\*First name, last name, and suffix (if applicable) are required and will appear in PubMed.

| *First Name and Middle Initial(s) | *Last Name | *Suffix (eg, Jr, III) | Academic Degrees | Institution                                               | Location (city, state/province, country) | Role or Contribution, eg, chair, principal investigator | Group (if more than 1 Group listed in the byline) and/or Subgroup (eg, Steering Committee) |
|-----------------------------------|------------|-----------------------|------------------|-----------------------------------------------------------|------------------------------------------|---------------------------------------------------------|--------------------------------------------------------------------------------------------|
| Keith                             | Muir       |                       |                  | University of Glasgow, Queen Elizabeth University Hospita | Glasgow, UK                              | Trial Steering Committee PISTE                          | HERMES collaborators                                                                       |
| Phil                              | White      |                       |                  | Newcastle University, Newcastle upon Tyne                 | Newcastle, UK                            | Trial Steering Committee PISTE, Site Investigator       | HERMES collaborators                                                                       |
| Martin M                          | Brown      |                       |                  | University College London Hospital                        | London, UK                               | Trial Steering Committee PISTE, Site Investigator       | HERMES collaborators                                                                       |
| Andrew                            | Clifton    |                       |                  | St George's, University of London                         | London, UK                               | Trial Steering Committee PISTE                          | HERMES collaborators                                                                       |
| Janet                             | Freeman    |                       |                  |                                                           | Cornwall, UK                             | Trial Steering Committee PISTE                          | HERMES collaborators                                                                       |
| Ian                               | Ford       |                       |                  | University of Glasgow                                     | Glasgow, UK                              | Trial Steering Committee PISTE                          | HERMES collaborators                                                                       |
| Hugh                              | Markus     |                       |                  |                                                           |                                          | Trial Steering Committee (chair) PISTE                  | HERMES collaborators                                                                       |
| Joanna                            | Wardlaw    |                       |                  | University of Edinburgh                                   | Edinburgh, UK                            | Trial Steering Committee PISTE                          | HERMES collaborators                                                                       |
| Claudia-Martina                   | Messow     |                       |                  | Oxford University Hospitals NHS Trust, Oxford Universit   | Oxford, UK                               |                                                         | HERMES collaborators                                                                       |
| Kennedy                           | Lees       |                       |                  |                                                           |                                          | Independent Data Monitoring Committee PISTE             | HERMES collaborators                                                                       |
| Andy                              | Molyneux   |                       |                  |                                                           |                                          | Independent Data Monitoring Committee PISTE             | HERMES collaborators                                                                       |
| Steff                             | Lewis      |                       |                  |                                                           |                                          | Independent Data Monitoring Committee PISTE             | HERMES collaborators                                                                       |
| Tom                               | Robinson   |                       |                  |                                                           |                                          | Independent Data Monitoring Committee PISTE             | HERMES collaborators                                                                       |

## Supplemental Online Content: Nonauthor Collaborators

\*First name, last name, and suffix (if applicable) are required and will appear in PubMed.

| *First Name and Middle Initial(s) | *Last Name  | *Suffix (eg, Jr, III) | Academic Degrees | Institution                            | Location (city, state/province, country) | Role or Contribution, eg, chair, principal investigator | Group (if more than 1 Group listed in the byline) and/or Subgroup (eg, Steering Committee) |
|-----------------------------------|-------------|-----------------------|------------------|----------------------------------------|------------------------------------------|---------------------------------------------------------|--------------------------------------------------------------------------------------------|
| Andy                              | Molyneux    |                       |                  |                                        |                                          | Independent Data Monitoring Committee PISTE             | HERMES collaborators                                                                       |
| John                              | Norrie      |                       |                  |                                        |                                          | Independent Data Monitoring Committee PISTE             | HERMES collaborators                                                                       |
| Fergus                            | Robertson   |                       |                  | University College London Hospital     | London, UK                               | Site Investigator PISTE                                 | HERMES collaborators                                                                       |
| Richard                           | Perry       |                       |                  | University College London Hospital     | London, UK                               | Site Investigator PISTE                                 | HERMES collaborators                                                                       |
| Anand                             | Dixit       |                       |                  | Newcastle University, Newcastle        | Newcastle, UK                            | Site Investigator PISTE                                 | HERMES collaborators                                                                       |
| Geoffrey C.                       | Cloud       |                       |                  | St. George's University of London      | London, UK                               | Site Investigator PISTE                                 | HERMES collaborators                                                                       |
| Jeremy                            | Madigan     |                       |                  | St. George's University of London      | London, UK                               | Site Investigator PISTE                                 | HERMES collaborators                                                                       |
| Christine                         | Roffe       |                       |                  | University Hospital of N Staffordshire |                                          | Site Investigator PISTE                                 | HERMES collaborators                                                                       |
| Sanjeev                           | Nayak       |                       |                  | University Hospital of N Staffordshire |                                          | Site Investigator PISTE                                 | HERMES collaborators                                                                       |
| Kyriakos                          | Lobotesis   |                       |                  | Charing Cross Hospital                 |                                          | Site Investigator PISTE                                 | HERMES collaborators                                                                       |
| Craig                             | Smith       |                       |                  | Salford Royal Hospital                 |                                          | Site Investigator PISTE                                 | HERMES collaborators                                                                       |
| Amit                              | Herwadkar   |                       |                  | Salford Royal Hospital                 |                                          | Site Investigator PISTE                                 | HERMES collaborators                                                                       |
| Naga                              | Kandasamy   |                       |                  | King's College Hospital                | London, UK                               | Site Investigator PISTE                                 | HERMES collaborators                                                                       |
| Tony                              | Goddard     |                       |                  |                                        | Leeds, UK                                | Site Investigator PISTE                                 | HERMES collaborators                                                                       |
| John                              | Bamford     |                       |                  |                                        | Leeds, UK                                | Site Investigator PISTE                                 | HERMES collaborators                                                                       |
| Ganesh                            | Subramanian |                       |                  | Queen's Medical Centre                 | Nottingham, UK                           | Site Investigator PISTE                                 | HERMES collaborators                                                                       |
| Rob                               | Lenthall    |                       |                  | Queen's Medical Centre                 | Nottingham, UK                           | Site Investigator PISTE                                 | HERMES collaborators                                                                       |
| Edward                            | Littleton   |                       |                  | QE Hospital Birmingham                 |                                          | Site Investigator PISTE                                 | HERMES collaborators                                                                       |
| Sal                               | Lamin       |                       |                  | QE Hospital Birmingham                 |                                          | Site Investigator PISTE                                 | HERMES collaborators                                                                       |
| Kelly                             | Storey      |                       |                  |                                        |                                          | Research coordinator PISTE                              | HERMES collaborators                                                                       |

## Supplemental Online Content: Nonauthor Collaborators

\*First name, last name, and suffix (if applicable) are required and will appear in PubMed.

| *First Name and Middle Initial(s) | *Last Name       | *Suffix (eg, Jr, III) | Academic Degrees | Institution                                                                                  | Location (city, state/province, country) | Role or Contribution, eg, chair, principal investigator                                            | Group (if more than 1 Group listed in the byline) and/or Subgroup (eg, Steering Committee) |
|-----------------------------------|------------------|-----------------------|------------------|----------------------------------------------------------------------------------------------|------------------------------------------|----------------------------------------------------------------------------------------------------|--------------------------------------------------------------------------------------------|
| Rita                              | Ghatala          |                       |                  |                                                                                              |                                          | Research coordinator PISTE                                                                         | HERMES collaborators                                                                       |
| Azra                              | Banaras          |                       |                  |                                                                                              |                                          | Research coordinator PISTE                                                                         | HERMES collaborators                                                                       |
| John                              | Aeron-Thomas     |                       |                  |                                                                                              |                                          | Research coordinator PISTE                                                                         | HERMES collaborators                                                                       |
| Bath                              | Hazel            |                       |                  |                                                                                              |                                          | Research coordinator PISTE                                                                         | HERMES collaborators                                                                       |
| Holly                             | Maguire          |                       |                  |                                                                                              |                                          | Research coordinator PISTE                                                                         | HERMES collaborators                                                                       |
| Emelda                            | Verqae           |                       |                  |                                                                                              |                                          | Research coordinator PISTE                                                                         | HERMES collaborators                                                                       |
| Louise                            | Harrison         |                       |                  |                                                                                              |                                          | Research coordinator PISTE                                                                         | HERMES collaborators                                                                       |
| Rekha                             | Keshvara         |                       |                  |                                                                                              |                                          | Research coordinator PISTE                                                                         | HERMES collaborators                                                                       |
| James                             | Cunningham       |                       |                  |                                                                                              |                                          | Research coordinator PISTE                                                                         | HERMES collaborators                                                                       |
| Diederik W.J.                     | Dippel           |                       |                  | Erasmus MC University Medical Center                                                         | Rotterdam, the Netherlands               | Executive committee, Local principal investigator, Writing                                         | MR CLEAN Registry investigators                                                            |
| Aad                               | van der Lugt     |                       |                  | Erasmus MC University Medical Center                                                         | Rotterdam, the Netherlands               | Executive committee, Local principal investigator, Imaging assessment committee, Writing committee | MR CLEAN Registry investigators                                                            |
| Charles B.L.M.                    | Majoie           |                       |                  | Amsterdam UMC, location University of Amsterdam                                              | Amsterdam, the Netherlands               | Executive committee, Local principal investigator, Imaging assessment committee, Writing committee | MR CLEAN Registry investigators                                                            |
| Yvo B.W.E.M.                      | Roos             |                       |                  | Amsterdam UMC, location University of Amsterdam                                              | Amsterdam, the Netherlands               | Executive committee, Local principal investigator, Writing committee                               | MR CLEAN Registry investigators                                                            |
| Robert J.                         | van Oostenbrugge |                       |                  | Maastricht University Medical Center+; School for Cardiovascular Diseases Maastricht (CARIM) | Maastricht, the Netherlands              | Executive committee, Local principal investigator, Writing committee, Adverse event committee      | MR CLEAN Registry investigators                                                            |
| Wim                               | van Zwam         |                       |                  | Maastricht University Medical Center+; School for Cardiovascular                             | Maastricht, the Netherlands              | Executive committee, Local principal investigator, Imaging                                         | MR CLEAN Registry investigators                                                            |

## Supplemental Online Content: Nonauthor Collaborators

\*First name, last name, and suffix (if applicable) are required and will appear in PubMed.

| *First Name and Middle Initial(s) | *Last Name | *Suffix (eg, Jr, III) | Academic Degrees | Institution                                                                                  | Location (city, state/province, country) | Role or Contribution, eg, chair, principal investigator                                            | Group (if more than 1 Group listed in the byline) and/or Subgroup (eg, Steering Committee) |
|-----------------------------------|------------|-----------------------|------------------|----------------------------------------------------------------------------------------------|------------------------------------------|----------------------------------------------------------------------------------------------------|--------------------------------------------------------------------------------------------|
| Jelis                             | Boiten     |                       |                  | Haaglanden MC                                                                                | the Hague, the Netherlands               | Executive committee, Local principal investigator, Writing committee                               | MR CLEAN Registry investigators                                                            |
| Jan Albert                        | Vos        |                       |                  | Sint Antonius Hospital                                                                       | Nieuwegein, the Netherlands              | Executive committee, Local principal investigator, Imaging assessment committee, Writing committee | MR CLEAN Registry investigators                                                            |
| Ivo G.H.                          | Jansen     |                       |                  | Amsterdam UMC, location University of Amsterdam                                              | Amsterdam, the Netherlands               | Study coordinator                                                                                  | MR CLEAN Registry investigators                                                            |
| Maxim J.H.L.                      | Mulder     |                       |                  | Erasmus MC University Medical Center                                                         | Rotterdam, the Netherlands               | Study coordinator                                                                                  | MR CLEAN Registry investigators                                                            |
| Robert- Jan B.                    | Goldhoorn  |                       |                  | Maastricht University Medical Center+; School for Cardiovascular Diseases Maastricht (CARIM) | Maastricht, the Netherlands              | Study coordinator                                                                                  | MR CLEAN Registry investigators                                                            |
| Kars C.J.                         | Compagne   |                       |                  | Erasmus MC University Medical Center                                                         | Rotterdam, the Netherlands               | Study coordinator                                                                                  | MR CLEAN Registry investigators                                                            |
| Manon                             | Kappelhof  |                       |                  | Amsterdam UMC, location University of Amsterdam                                              | Amsterdam, the Netherlands               | Study coordinator                                                                                  | MR CLEAN Registry investigators                                                            |
| Josje                             | Brouwer    |                       |                  | Amsterdam UMC, location University of Amsterdam                                              | Amsterdam, the Netherlands               | Study coordinator                                                                                  | MR CLEAN Registry investigators                                                            |
| Sanne J.                          | den Hartog |                       |                  | Erasmus MC University Medical Center                                                         | Rotterdam, the Netherlands               | Study coordinator                                                                                  | MR CLEAN Registry investigators                                                            |
| Wouter H.                         | Hinsenveld |                       |                  | Maastricht University Medical Center+                                                        | Maastricht, the Netherlands              | Study coordinator                                                                                  | MR CLEAN Registry investigators                                                            |
| Bob                               | Roozenbeek |                       |                  | Erasmus MC University Medical Center                                                         | Rotterdam, the Netherlands               | Local principal investigator                                                                       | MR CLEAN Registry investigators                                                            |

## Supplemental Online Content: Nonauthor Collaborators

\*First name, last name, and suffix (if applicable) are required and will appear in PubMed.

| *First Name and Middle Initial(s) | *Last Name          | *Suffix (eg, Jr, III) | Academic Degrees | Institution                                                                                  | Location (city, state/province, country) | Role or Contribution, eg, chair, principal investigator                       | Group (if more than 1 Group listed in the byline) and/or Subgroup (eg, Steering Committee) |
|-----------------------------------|---------------------|-----------------------|------------------|----------------------------------------------------------------------------------------------|------------------------------------------|-------------------------------------------------------------------------------|--------------------------------------------------------------------------------------------|
| Adriaan C.G.M.                    | van Es              |                       |                  | Leiden University Medical Center                                                             | Leiden, the Netherlands                  | Local principal investigator, Imaging assessment committee                    | MR CLEAN Registry investigators                                                            |
| Bart J.                           | Emmer               |                       |                  | Amsterdam UMC, location University of Amsterdam                                              | Amsterdam, the Netherlands               | Local principal investigator, Imaging assessment committee                    | MR CLEAN Registry investigators                                                            |
| Jonathan M.                       | Coutinho            |                       |                  | Amsterdam UMC, location University of Amsterdam                                              | Amsterdam, the Netherlands               | Local principal investigator                                                  | MR CLEAN Registry investigators                                                            |
| Wouter J.                         | Schonewille         |                       |                  | Sint Antonius Hospital                                                                       | Nieuwegein, the Netherlands              | Local principal investigator, Writing committee                               | MR CLEAN Registry investigators                                                            |
| Marieke J.H.                      | Wermer              |                       |                  | Leiden University Medical Center                                                             | Leiden, the Netherlands                  | Local principal investigator                                                  | MR CLEAN Registry investigators                                                            |
| Marianne A.A.                     | van Walderveen      |                       |                  | Leiden University Medical Center                                                             | Leiden, the Netherlands                  | Local principal investigator, Imaging assessment committee                    | MR CLEAN Registry investigators                                                            |
| Julie                             | Staals              |                       |                  | Maastricht University Medical Center+; School for Cardiovascular Diseases Maastricht (CARIM) | Maastricht, the Netherlands              | Local principal investigator                                                  | MR CLEAN Registry investigators                                                            |
| Jeannette                         | Hofmeijer           |                       |                  | Rijnstate Hospital                                                                           | Arnhem, the Netherlands                  | Local principal investigator, Writing committee, Adverse event committee      | MR CLEAN Registry investigators                                                            |
| Jasper M.                         | Martens             |                       |                  | Rijnstate Hospital                                                                           | Arnhem, the Netherlands                  | Local principal investigator,                                                 | MR CLEAN Registry investigators                                                            |
| Geert J.                          | Lycklama à Nijeholt |                       |                  | Haaglanden MC                                                                                | the Hague, the Netherlands               | Local principal investigator, Imaging assessment committee, Writing committee | MR CLEAN Registry investigators                                                            |
| Sebastiaan F                      | de Bruijn           |                       |                  | HAGA Hospital                                                                                | the Hague, the Netherlands               | Local principal investigator                                                  | MR CLEAN Registry investigators                                                            |

## Supplemental Online Content: Nonauthor Collaborators

\*First name, last name, and suffix (if applicable) are required and will appear in PubMed.

| *First Name and Middle Initial(s) | *Last Name   | *Suffix (eg, Jr, III) | Academic Degrees | Institution                                 | Location (city, state/province, country) | Role or Contribution, eg, chair, principal investigator                       | Group (if more than 1 Group listed in the byline) and/or Subgroup (eg, Steering Committee) |
|-----------------------------------|--------------|-----------------------|------------------|---------------------------------------------|------------------------------------------|-------------------------------------------------------------------------------|--------------------------------------------------------------------------------------------|
| Lukas C.                          | van Dijk     |                       |                  | HAGA Hospital                               | the Hague, the Netherlands               | Local principal investigator                                                  | MR CLEAN Registry investigators                                                            |
| H. Bart                           | van der Worp |                       |                  | University Medical Center Utrecht           | Utrecht, the Netherlands                 | Local principal investigator, Writing committee                               | MR CLEAN Registry investigators                                                            |
| Rob H.                            | Lo           |                       |                  | University Medical Center Utrecht           | Utrecht, the Netherlands                 | Local principal investigator, Imaging assessment committee, Writing committee | MR CLEAN Registry investigators                                                            |
| Ewoud J.                          | van Dijk     |                       |                  | Radboud University Medical Center, Nijmegen | Nijmegen, the Netherlands                | Local principal investigator                                                  | MR CLEAN Registry investigators                                                            |
| Hieronymus D.                     | Boogaarts    |                       |                  | Radboud University Medical Center, Nijmegen | Nijmegen, the Netherlands                | Local principal investigator, Imaging assessment committee                    | MR CLEAN Registry investigators                                                            |
| J.                                | de Vries     |                       |                  | Isala Klinieken                             | Zwolle, the Netherlands                  | Local principal investigator                                                  | MR CLEAN Registry investigators                                                            |
| Paul L.M.                         | de Kort      |                       |                  | Elisabeth-TweeSteden ziekenhuis             | Tilburg, the Netherlands                 | Local principal investigator                                                  | MR CLEAN Registry investigators                                                            |
| Julia                             | van Tuijl    |                       |                  | Elisabeth-TweeSteden ziekenhuis             | Tilburg, the Netherlands                 | Local principal investigator                                                  | MR CLEAN Registry investigators                                                            |
| Jo P.                             | Peluso       |                       |                  | Elisabeth-TweeSteden ziekenhuis             | Tilburg, the Netherlands                 | Local principal investigator, Imaging assessment committee                    | MR CLEAN Registry investigators                                                            |
| Puck                              | Fransen      |                       |                  | Isala Klinieken                             | Zwolle, the Netherlands                  | Local principal investigator                                                  | MR CLEAN Registry investigators                                                            |
| Jan S.P.                          | van den Berg |                       |                  | Isala Klinieken                             | Zwolle, the Netherlands                  | Local principal investigator                                                  | MR CLEAN Registry investigators                                                            |
| Boudewijn A.A.M.                  | van Hasselt  |                       |                  | Isala Klinieken                             | Zwolle, the Netherlands                  | Local principal investigator                                                  | MR CLEAN Registry investigators                                                            |
| Leo A.M.                          | Aerden       |                       |                  | Reinier de Graaf Gasthuis                   | Delft, the Netherlands                   | Local principal investigator                                                  | MR CLEAN Registry investigators                                                            |
| René J.                           | Dallinga     |                       |                  | Reinier de Graaf Gasthuis                   | Delft, the Netherlands                   | Local principal investigator                                                  | MR CLEAN Registry investigators                                                            |



## Supplemental Online Content: Nonauthor Collaborators

\*First name, last name, and suffix (if applicable) are required and will appear in PubMed.

| *First Name and Middle Initial(s) | *Last Name     | *Suffix (eg, Jr, III) | Academic Degrees | Institution                                     | Location (city, state/province, country) | Role or Contribution, eg, chair, principal investigator    | Group (if more than 1 Group listed in the byline) and/or Subgroup (eg, Steering Committee) |
|-----------------------------------|----------------|-----------------------|------------------|-------------------------------------------------|------------------------------------------|------------------------------------------------------------|--------------------------------------------------------------------------------------------|
| Maarten                           | Uyttenboogaart |                       |                  | University Medical Center Groningen             | Groningen, the Netherlands               | Local principal investigator                               | MR CLEAN Registry investigators                                                            |
| Omid                              | Eschgi         |                       |                  | University Medical Center Groningen             | Groningen, the Netherlands               | Local principal investigator                               | MR CLEAN Registry investigators                                                            |
| Reinoud P.H.                      | Bokkers        |                       |                  | University Medical Center Groningen             | Groningen, the Netherlands               | Local principal investigator, Imaging assessment committee | MR CLEAN Registry investigators                                                            |
| Tobien H.C.M.L.                   | Schreuder      |                       |                  | Atrium Medical Center                           | Heerlen, the Netherlands                 | Local principal investigator                               | MR CLEAN Registry investigators                                                            |
| Roel J.J.                         | Heijboer       |                       |                  | Atrium Medical Center                           | Heerlen, the Netherlands                 | Local principal investigator                               | MR CLEAN Registry investigators                                                            |
| Koos                              | Keizer         |                       |                  | Catharina Hospital                              | Eindhoven, the Netherlands               | Local principal investigator                               | MR CLEAN Registry investigators                                                            |
| Lonneke S.F.                      | Yo             |                       |                  | Catharina Hospital                              | Eindhoven, the Netherlands               | Local principal investigator, Imaging assessment committee | MR CLEAN Registry investigators                                                            |
| Heleen M.                         | den Hertog     |                       |                  | Isala Klinieken                                 | Zwolle, the Netherlands                  | Local principal investigator                               | MR CLEAN Registry investigators                                                            |
| Tomas                             | Bulut          |                       |                  | Medisch Spectrum Twente                         | Enschede, the Netherlands                | Local principal investigator                               | MR CLEAN Registry investigators                                                            |
| Paul J.A.M.                       | Brouwers       |                       |                  | Medisch Spectrum Twente                         | Enschede, the Netherlands                | Local principal investigator                               | MR CLEAN Registry investigators                                                            |
| Marieke E.S.                      | Sprengers      |                       |                  | Amsterdam UMC, location University of Amsterdam | Amsterdam, the Netherlands               | Imaging assessment committee                               | MR CLEAN Registry investigators                                                            |
| Sjoerd F.M.                       | Jenniskens     |                       |                  | Radboud University Medical Center               | Nijmegen, the Netherlands                | Imaging assessment committee                               | MR CLEAN Registry investigators                                                            |
| René                              | van den Berg   |                       |                  | Amsterdam UMC, location University of Amsterdam | Amsterdam, the Netherlands               | Imaging assessment committee                               | MR CLEAN Registry investigators                                                            |
| Albert J.                         | Yoo            |                       |                  | Texas Stroke Institute                          | Texas, United States                     | Imaging assessment committee                               | MR CLEAN Registry investigators                                                            |

## Supplemental Online Content: Nonauthor Collaborators

\*First name, last name, and suffix (if applicable) are required and will appear in PubMed.

| *First Name and Middle Initial(s) | *Last Name        | *Suffix (eg, Jr, III) | Academic Degrees | Institution                                                                            | Location (city, state/province, country) | Role or Contribution, eg, chair, principal investigator | Group (if more than 1 Group listed in the byline) and/or Subgroup (eg, Steering Committee) |
|-----------------------------------|-------------------|-----------------------|------------------|----------------------------------------------------------------------------------------|------------------------------------------|---------------------------------------------------------|--------------------------------------------------------------------------------------------|
| Ludo F.M.                         | Beenen            |                       |                  | Amsterdam UMC, location University of Amsterdam                                        | Amsterdam, the Netherlands               | Imaging assessment committee                            | MR CLEAN Registry investigators                                                            |
| Alida A.                          | Postma            |                       |                  | Maastricht University Medical Center+; MHeNs School for Mental Health and Neuroscience | Maastricht, the Netherlands              | Imaging assessment committee                            | MR CLEAN Registry investigators                                                            |
| Stefan D.                         | Roosendaal        |                       |                  | Amsterdam UMC, location University of Amsterdam                                        | Amsterdam, the Netherlands               | Imaging assessment committee                            | MR CLEAN Registry investigators                                                            |
| Bas F.W.                          | van der Kallen    |                       |                  | Haaglanden MC                                                                          | the Hague, the Netherlands               | Imaging assessment committee                            | MR CLEAN Registry investigators                                                            |
| Ido R.                            | van den Wijngaard |                       |                  | Haaglanden MC                                                                          | the Hague, the Netherlands               | Imaging assessment committee                            | MR CLEAN Registry investigators                                                            |
| Joost                             | Bot               |                       |                  | Amsterdam UMC, Vrije Universiteit van Amsterdam                                        | Amsterdam, the Netherlands               | Imaging assessment committee                            | MR CLEAN Registry investigators                                                            |
| Pieter-Jan                        | van Doormaal      |                       |                  | Erasmus MC University Medical Center                                                   | Rotterdam, the Netherlands               | Imaging assessment committee                            | MR CLEAN Registry investigators                                                            |
| Anton                             | Meijer            |                       |                  | Radboud University Medical Center                                                      | Nijmegen, the Netherlands                | Imaging assessment committee                            | MR CLEAN Registry investigators                                                            |
| Elyas                             | Ghariq            |                       |                  | Haaglanden MC                                                                          | the Hague, the Netherlands               | Imaging assessment committee                            | MR CLEAN Registry investigators                                                            |
| Marc P.                           | van Proosdij      |                       |                  | Noordwest Ziekenhuisgroep                                                              | Alkmaar, the Netherlands                 | Imaging assessment committee                            | MR CLEAN Registry investigators                                                            |
| G. Menno                          | Krietemeijer      |                       |                  | Catharina Hospital                                                                     | Eindhoven, the Netherlands               | Imaging assessment committee                            | MR CLEAN Registry investigators                                                            |
| Wouter                            | Dinkelaar         |                       |                  | Erasmus MC University Medical Center                                                   | Rotterdam, the Netherlands               | Imaging assessment committee                            | MR CLEAN Registry investigators                                                            |
| Auke P.A.                         | Appelman          |                       |                  | University Medical Center Groningen                                                    | Groningen, the Netherlands               | Imaging assessment committee                            | MR CLEAN Registry investigators                                                            |

## Supplemental Online Content: Nonauthor Collaborators

\*First name, last name, and suffix (if applicable) are required and will appear in PubMed.

| *First Name and Middle Initial(s) | *Last Name    | *Suffix (eg, Jr, III) | Academic Degrees | Institution                                     | Location (city, state/province, country) | Role or Contribution, eg, chair, principal investigator | Group (if more than 1 Group listed in the byline) and/or Subgroup (eg, Steering Committee) |
|-----------------------------------|---------------|-----------------------|------------------|-------------------------------------------------|------------------------------------------|---------------------------------------------------------|--------------------------------------------------------------------------------------------|
| Bas                               | Hammer        |                       |                  | HAGA Hospital                                   | the Hague, the Netherlands               | Imaging assessment committee                            | MR CLEAN Registry investigators                                                            |
| Sjoert                            | Pegge         |                       |                  | Radboud University Medical Center               | Nijmegen, the Netherlands                | Imaging assessment committee                            | MR CLEAN Registry investigators                                                            |
| Anouk                             | van der Hoorn |                       |                  | University Medical Center Groningen             | Groningen, the Netherlands               | Imaging assessment committee                            | MR CLEAN Registry investigators                                                            |
| Saman                             | Vinke         |                       |                  | Radboud University Medical Center               | Nijmegen, the Netherlands                | Imaging assessment committee                            | MR CLEAN Registry investigators                                                            |
| H. Zwenneke                       | Flach         |                       |                  | Isala Klinieken                                 | Zwolle, the Netherlands                  | Adverse event committee                                 | MR CLEAN Registry investigators                                                            |
| Hester F.                         | Lingsma       |                       |                  | Erasmus MC University Medical Center            | Rotterdam, the Netherlands               | Trial methodologist                                     | MR CLEAN Registry investigators                                                            |
| Naziha                            | el Ghannouti  |                       |                  | Erasmus MC University Medical Center            | Rotterdam, the Netherlands               | Research nurses/ local trial coordinators               | MR CLEAN Registry investigators                                                            |
| Martin                            | Sterrenberg   |                       |                  | Erasmus MC University Medical Center            | Rotterdam, the Netherlands               | Research nurses/ local trial coordinators               | MR CLEAN Registry investigators                                                            |
| Wilma                             | Pellikaan     |                       |                  | Sint Antonius Hospital                          | Nieuwegein, the Netherlands              | Research nurses/ local trial coordinators               | MR CLEAN Registry investigators                                                            |
| Rita                              | Sprengers     |                       |                  | Amsterdam UMC, location University of Amsterdam | Amsterdam, the Netherlands               | Research nurses/ local trial coordinators               | MR CLEAN Registry investigators                                                            |
| Marjan                            | Elfrink       |                       |                  | Rijnstate Hospital                              | Arnhem, the Netherlands                  | Research nurses/ local trial coordinators               | MR CLEAN Registry investigators                                                            |
| Michelle                          | Simons        |                       |                  | Rijnstate Hospital                              | Arnhem, the Netherlands                  | Research nurses/ local trial coordinators               | MR CLEAN Registry investigators                                                            |
| Marjolein                         | Vossers       |                       |                  | Rijnstate Hospital                              | Arnhem, the Netherlands                  | Research nurses/ local trial coordinators               | MR CLEAN Registry investigators                                                            |
| Joke                              | de Meris      |                       |                  | Haaglanden MC                                   | the Hague, the Netherlands               | Research nurses/ local trial coordinators               | MR CLEAN Registry investigators                                                            |
| Tamara                            | Vermeulen     |                       |                  | Haaglanden MC                                   | the Hague, the Netherlands               | Research nurses/ local trial coordinators               | MR CLEAN Registry investigators                                                            |

## Supplemental Online Content: Nonauthor Collaborators

\*First name, last name, and suffix (if applicable) are required and will appear in PubMed.

| *First Name and Middle Initial(s) | *Last Name   | *Suffix (eg, Jr, III) | Academic Degrees | Institution                           | Location (city, state/province, country) | Role or Contribution, eg, chair, principal investigator | Group (if more than 1 Group listed in the byline) and/or Subgroup (eg, Steering Committee) |
|-----------------------------------|--------------|-----------------------|------------------|---------------------------------------|------------------------------------------|---------------------------------------------------------|--------------------------------------------------------------------------------------------|
| Annet                             | Geerlings    |                       |                  | Radboud University Medical Center     | Nijmegen, the Netherlands                | Research nurses/ local trial coordinators               | MR CLEAN Registry investigators                                                            |
| Gina                              | van Vemde    |                       |                  | Isala Klinieken                       | Zwolle, the Netherlands                  | Research nurses/ local trial coordinators               | MR CLEAN Registry investigators                                                            |
| Tiny                              | Simons       |                       |                  | Atrium Medical Center                 | Heerlen, the Netherlands                 | Research nurses/ local trial coordinators               | MR CLEAN Registry investigators                                                            |
| Gert                              | Messchendorp |                       |                  | University Medical Center Groningen   | Groningen, the Netherlands               | Research nurses/ local trial coordinators               | MR CLEAN Registry investigators                                                            |
| Nynke                             | Nicolaj      |                       |                  | University Medical Center Groningen   | Groningen, the Netherlands               | Research nurses/ local trial coordinators               | MR CLEAN Registry investigators                                                            |
| Hester                            | Bongenaar    |                       |                  | Catharina Hospital                    | Eindhoven, the Netherlands               | Research nurses/ local trial coordinators               | MR CLEAN Registry investigators                                                            |
| Karin                             | Bodde        |                       |                  | Reinier de Graaf Gasthuis             | Delft, the Netherlands                   | Research nurses/ local trial coordinators               | MR CLEAN Registry investigators                                                            |
| Sandra                            | Kleijn       |                       |                  | Medisch Spectrum Twente               | Enschede, the Netherlands                | Research nurses/ local trial coordinators               | MR CLEAN Registry investigators                                                            |
| Jasmijn                           | Lodico       |                       |                  | Medisch Spectrum Twente               | Enschede, the Netherlands                | Research nurses/ local trial coordinators               | MR CLEAN Registry investigators                                                            |
| Hanneke                           | Droste       |                       |                  | Medisch Spectrum Twente               | Enschede, the Netherlands                | Research nurses/ local trial coordinators               | MR CLEAN Registry investigators                                                            |
| Maureen                           | Wollaert     |                       |                  | Maastricht University Medical Center+ | Maastricht, the Netherlands              | Research nurses/ local trial coordinators               | MR CLEAN Registry investigators                                                            |
| Sabrina                           | Verheesen    |                       |                  | Maastricht University Medical Center+ | Maastricht, the Netherlands              | Research nurses/ local trial coordinators               | MR CLEAN Registry investigators                                                            |
| D.                                | Jeurrissen   |                       |                  | Maastricht University Medical Center+ | Maastricht, the Netherlands              | Research nurses/ local trial coordinators               | MR CLEAN Registry investigators                                                            |
| Erna                              | Bos          |                       |                  | Leiden University Medical Center      | Leiden, the Netherlands                  | Research nurses/ local trial coordinators               | MR CLEAN Registry investigators                                                            |
| Yvonne                            | Drabbe       |                       |                  | HAGA Hospital                         | the Hague, the Netherlands               | Research nurses/ local trial coordinators               | MR CLEAN Registry investigators                                                            |
| Michelle                          | Sandiman     |                       |                  | HAGA Hospital                         | the Hague, the Netherlands               | Research nurses/ local trial coordinators               | MR CLEAN Registry investigators                                                            |

## Supplemental Online Content: Nonauthor Collaborators

\*First name, last name, and suffix (if applicable) are required and will appear in PubMed.

| *First Name and Middle Initial(s) | *Last Name   | *Suffix (eg, Jr, III) | Academic Degrees | Institution                                     | Location (city, state/province, country) | Role or Contribution, eg, chair, principal investigator | Group (if more than 1 Group listed in the byline) and/or Subgroup (eg, Steering Committee) |
|-----------------------------------|--------------|-----------------------|------------------|-------------------------------------------------|------------------------------------------|---------------------------------------------------------|--------------------------------------------------------------------------------------------|
| Nicoline                          | Aaldering    |                       |                  | Rijnstate Hospital                              | Arnhem, the Netherlands                  | Research nurses/ local trial coordinators               | MR CLEAN Registry investigators                                                            |
| Berber                            | Zweeijk      |                       |                  | University Medical Center Utrecht               | Utrecht, the Netherlands                 | Research nurses/ local trial coordinators               | MR CLEAN Registry investigators                                                            |
| Jocova                            | Vervoort     |                       |                  | Elisabeth-TweeSteden ziekenhuis                 | Tilburg, the Netherlands                 | Research nurses/ local trial coordinators               | MR CLEAN Registry investigators                                                            |
| Eva                               | Ponjee       |                       |                  | Isala Klinieken                                 | Zwolle, the Netherlands                  | Research nurses/ local trial coordinators               | MR CLEAN Registry investigators                                                            |
| Sharon                            | Romviel      |                       |                  | Radboud University Medical Center               | Nijmegen, the Netherlands                | Research nurses/ local trial coordinators               | MR CLEAN Registry investigators                                                            |
| Karin                             | Kanselaar    |                       |                  | Radboud University Medical Center               | Nijmegen, the Netherlands                | Research nurses/ local trial coordinators               | MR CLEAN Registry investigators                                                            |
| Denn                              | Barning      |                       |                  | Leiden University Medical Center                | Leiden, the Netherlands                  | Research nurses/ local trial coordinators               | MR CLEAN Registry investigators                                                            |
| Esmee                             | Venema       |                       |                  | Erasmus MC University Medical Center            | Rotterdam, the Netherlands               | PhD / Medical students                                  | MR CLEAN Registry investigators                                                            |
| Vicky                             | Chalos       |                       |                  | Erasmus MC University Medical Center            | Rotterdam, the Netherlands               | PhD / Medical students                                  | MR CLEAN Registry investigators                                                            |
| Ralph R.                          | Geuskens     |                       |                  | Amsterdam UMC, location University of Amsterdam | Amsterdam, the Netherlands               | PhD / Medical students                                  | MR CLEAN Registry investigators                                                            |
| Tim                               | van Straaten |                       |                  | Radboud University Medical Center               | Nijmegen, the Netherlands                | PhD / Medical students                                  | MR CLEAN Registry investigators                                                            |
| Saliha                            | Ergezen      |                       |                  | Erasmus MC University Medical Center            | Rotterdam, the Netherlands               | PhD / Medical students                                  | MR CLEAN Registry investigators                                                            |
| Roger R.M.                        | Harmsma      |                       |                  | Erasmus MC University Medical Center            | Rotterdam, the Netherlands               | PhD / Medical students                                  | MR CLEAN Registry investigators                                                            |
| Daan                              | Muijres      |                       |                  | Erasmus MC University Medical Center            | Rotterdam, the Netherlands               | PhD / Medical students                                  | MR CLEAN Registry investigators                                                            |
| Anouk                             | de Jong      |                       |                  | Erasmus MC University Medical Center            | Rotterdam, the Netherlands               | PhD / Medical students                                  | MR CLEAN Registry investigators                                                            |

## Supplemental Online Content: Nonauthor Collaborators

\*First name, last name, and suffix (if applicable) are required and will appear in PubMed.

| *First Name and Middle Initial(s) | *Last Name     | *Suffix (eg, Jr, III) | Academic Degrees | Institution                                     | Location (city, state/province, country) | Role or Contribution, eg, chair, principal investigator | Group (if more than 1 Group listed in the byline) and/or Subgroup (eg, Steering Committee) |
|-----------------------------------|----------------|-----------------------|------------------|-------------------------------------------------|------------------------------------------|---------------------------------------------------------|--------------------------------------------------------------------------------------------|
| Olvert A.                         | Berkhemer      |                       |                  | Amsterdam UMC, location University of Amsterdam | Amsterdam, the Netherlands               | PhD / Medical students                                  | MR CLEAN Registry investigators                                                            |
| Anna                              | M.M. Boers     |                       |                  | Amsterdam UMC, location University of Amsterdam | Amsterdam, the Netherlands               | PhD / Medical students                                  | MR CLEAN Registry investigators                                                            |
| J.                                | Huguet         |                       |                  | Amsterdam UMC, location University of Amsterdam | Amsterdam, the Netherlands               | PhD / Medical students                                  | MR CLEAN Registry investigators                                                            |
| P.F.C.                            | Groot          |                       |                  | Amsterdam UMC, location University of Amsterdam | Amsterdam, the Netherlands               | PhD / Medical students                                  | MR CLEAN Registry investigators                                                            |
| Marieke A.                        | Mens           |                       |                  | Amsterdam UMC, location University of Amsterdam | Amsterdam, the Netherlands               | PhD / Medical students                                  | MR CLEAN Registry investigators                                                            |
| Katinka R.                        | van Kranendonk |                       |                  | Amsterdam UMC, location University of Amsterdam | Amsterdam, the Netherlands               | PhD / Medical students                                  | MR CLEAN Registry investigators                                                            |
| Kilian M.                         | Treurniet      |                       |                  | Amsterdam UMC, location University of Amsterdam | Amsterdam, the Netherlands               | PhD / Medical students                                  | MR CLEAN Registry investigators                                                            |
| Manon L.                          | Tolhuisen      |                       |                  | Amsterdam UMC, location University of Amsterdam | Amsterdam, the Netherlands               | PhD / Medical students                                  | MR CLEAN Registry investigators                                                            |
| Heitor                            | Alves          |                       |                  | Amsterdam UMC, location University of Amsterdam | Amsterdam, the Netherlands               | PhD / Medical students                                  | MR CLEAN Registry investigators                                                            |
| Annick J.                         | Weterings      |                       |                  | Amsterdam UMC, location University of Amsterdam | Amsterdam, the Netherlands               | PhD / Medical students                                  | MR CLEAN Registry investigators                                                            |

## Supplemental Online Content: Nonauthor Collaborators

\*First name, last name, and suffix (if applicable) are required and will appear in PubMed.

| *First Name and Middle Initial(s) | *Last Name      | *Suffix (eg, Jr, III) | Academic Degrees | Institution                                     | Location (city, state/province, country) | Role or Contribution, eg, chair, principal investigator | Group (if more than 1 Group listed in the byline) and/or Subgroup (eg, Steering Committee) |
|-----------------------------------|-----------------|-----------------------|------------------|-------------------------------------------------|------------------------------------------|---------------------------------------------------------|--------------------------------------------------------------------------------------------|
| Eleonora L.F.                     | Kirkels         |                       |                  | Amsterdam UMC, location University of Amsterdam | Amsterdam, the Netherlands               | PhD / Medical students                                  | MR CLEAN Registry investigators                                                            |
| Eva J.H.F.                        | Voogd           |                       |                  | Rijnstate Hospital                              | Arnhem, the Netherlands                  | PhD / Medical students                                  | MR CLEAN Registry investigators                                                            |
| Lieve M.                          | Schupp          |                       |                  | Amsterdam UMC, location University of Amsterdam | Amsterdam, the Netherlands               | PhD / Medical students                                  | MR CLEAN Registry investigators                                                            |
| Sabine L.                         | Collette        |                       |                  | University Medical Center Groningen             | Groningen, the Netherlands               | PhD / Medical students                                  | MR CLEAN Registry investigators                                                            |
| Adrien E.D.                       | Groot           |                       |                  | Amsterdam UMC, location University of Amsterdam | Amsterdam, the Netherlands               | PhD / Medical students                                  | MR CLEAN Registry investigators                                                            |
| Natalie E.                        | LeCouffe        |                       |                  | Amsterdam UMC, location University of Amsterdam | Amsterdam, the Netherlands               | PhD / Medical students                                  | MR CLEAN Registry investigators                                                            |
| Praneeta R.                       | Konduri         |                       |                  | Amsterdam UMC, location University of Amsterdam | Amsterdam, the Netherlands               | PhD / Medical students                                  | MR CLEAN Registry investigators                                                            |
| Haryadi                           | Prasetya        |                       |                  | Amsterdam UMC, location University of Amsterdam | Amsterdam, the Netherlands               | PhD / Medical students                                  | MR CLEAN Registry investigators                                                            |
| Nerea                             | Arrate-Terreros |                       |                  | Amsterdam UMC, location University of Amsterdam | Amsterdam, the Netherlands               | PhD / Medical students                                  |                                                                                            |
| Lucas A.                          | Ramos           |                       |                  | Amsterdam UMC, location University of Amsterdam | Amsterdam, the Netherlands               | PhD / Medical students                                  |                                                                                            |
