# Supplementary material
Source: PubMed Central journal article supplement (PMC10391355)
Supplement: jamaneurol-e232392-s003.pdf [file jamaneurol-e232392-s003.pdf]

## Data Sharing Statement

Chalos. Development and Validation of a Postprocedural Model to Predict Outcome After Endovascular Treatment for Ischemic Stroke. *JAMA Neurol.* Published July 31, 2023.  
doi:10.1001/jamaneurol.2023.2392

### Data

**Data available:** No

### Additional Information

**Explanation for why data not available:** The tool will be publicly accessible online and the full regression equation can be found in the Data Supplement. Additional information is available from the corresponding author upon reasonable request. Individual patient data will not be made available. HERMES data are available via the VISTA-Endovascular repository.
